# Supplementary material
Source: publisher figshare collection journal article supplement (https://karger.figshare.com/articles/dataset/_/5514037)
Supplement: Supplementary file 1 [file 1]

Supplemental Online Material 3: **Gene expression of selected genes, comparison of expression levels in micro-array and qPCR**

„Regulation of angiogenic and inflammatory factors in CNV-derived RPE” Christoph Ehlken et al.

| Gen    | micro-array |            | qPCR   |            |                    |               |               |
|--------|-------------|------------|--------|------------|--------------------|---------------|---------------|
|        | hRPE        | CNV-RPE-69 | hRPE   | CNV-RPE-69 | <i>Fibroblasts</i> | <i>HeLa</i>   | <i>HUVEC</i>  |
| CRALBP | 0,0401      | 0,0030     | 0,1275 | 0,0066     | <i>nd</i>          | <i>nd</i>     | <i>nd</i>     |
| KRT18  | 1,1727      | 1,7832     | 0,8236 | 1,0289     | <i>0,1321</i>      | <i>0,8470</i> | <i>0,3906</i> |
| PEDF   | 2,7198      | 0,1267     | 4,8235 | 0,1595     | <i>0,8951</i>      | <i>nd</i>     | <i>nd</i>     |
| VIM    | 1,1938      | 1,2575     | 1,6473 | 1,0186     | <i>1,2554</i>      | <i>0,7416</i> | <i>0,8207</i> |

**Legend:**

nd = not detectable; hRPE = primary human retinal pigment epithelium; CNV-RPE-69 = CNV derived retinal pigment epithelium cells (cell line 69);

Gene expression was normalized to beta-actin as reference gene and to ARPE as reference cell line.

CRALBP (cellular retinaldehyde binding protein) was expressed in both hRPE (human RPE) and CNV-RPE-69, but not in the other cell lines. KRT18 (cytokeratin 18) and VIM (Vimentin) was expressed at comparable levels in the three RPE cell lines (ARPE, hRPE, CNV-RPE-69). PEDF (pigment epithelium-derived factor) was highly expressed in hRPE, but not in CNV-RPE-69.
