# Supplementary material
Source: publisher figshare collection journal article supplement (https://karger.figshare.com/articles/dataset/_/5514037)
Supplement: Supplementary file 2 [file 1]

| Gene ID  | hRPE    |        | CNV RPE M69 |        | CNV RPE M88 |        | CNV RPE combined |         | fold change (log2) |       | FDR      |
|----------|---------|--------|-------------|--------|-------------|--------|------------------|---------|--------------------|-------|----------|
|          | mean    | SD     | mean        | SD     | mean        | SD     | mean             | SD      |                    |       |          |
| A1BG-AS1 | 445.9   | 6.2    | 805.1       | 44.7   | 1096.2      | 38.6   | 950.6            | 160.3   | 1.08               | 2.12  | <0,00001 |
| AAMDC    | 1019.2  | 54.3   | 1738.5      | 68.2   | 3971.8      | 112.1  | 2855.2           | 1196.9  | 1.41               | 2.66  | 0.00001  |
| AARD     | 54.0    | 5.7    | 71.5        | 5.7    | 178.4       | 15.0   | 125.0            | 58.1    | 1.14               | 2.20  | 0.00226  |
| AASS     | 798.0   | 41.0   | 283.4       | 16.7   | 365.9       | 14.0   | 324.6            | 46.4    | -1.29              | 0.41  | <0,00001 |
| ABCA17P  | 72.3    | 4.2    | 96.0        | 8.9    | 307.3       | 15.2   | 201.6            | 113.6   | 1.36               | 2.56  | 0.00175  |
| ABCA4    | 55.7    | 2.2    | 63.2        | 4.3    | 240.7       | 8.3    | 152.0            | 95.1    | 1.29               | 2.45  | 0.00745  |
| ABCB1    | 341.5   | 8.1    | 40.4        | 1.6    | 38.9        | 1.0    | 39.6             | 1.5     | -3.10              | 0.12  | <0,00001 |
| ABCC3    | 54.7    | 3.8    | 706.8       | 196.2  | 1101.2      | 35.2   | 904.0            | 247.9   | 3.94               | 15.36 | <0,00001 |
| ABCG4    | 1243.8  | 73.8   | 539.2       | 95.4   | 238.7       | 16.2   | 389.0            | 172.6   | -1.59              | 0.33  | <0,00001 |
| ABR      | 52888.6 | 2459.7 | 22221.0     | 995.0  | 15160.6     | 470.8  | 18690.8          | 3842.1  | -1.48              | 0.36  | <0,00001 |
| ABTB2    | 171.3   | 3.3    | 1424.4      | 38.3   | 239.4       | 31.8   | 831.9            | 634.3   | 1.91               | 3.76  | 0.00057  |
| ACADM    | 1648.8  | 190.6  | 794.4       | 73.0   | 716.2       | 113.6  | 755.3            | 97.8    | -1.12              | 0.46  | <0,00001 |
| ACKR3    | 633.7   | 46.5   | 2643.4      | 617.5  | 17131.3     | 705.3  | 9887.3           | 7768.3  | 3.24               | 9.44  | <0,00001 |
| ACOX2    | 963.6   | 58.0   | 2561.4      | 85.2   | 2253.1      | 270.1  | 2407.2           | 248.0   | 1.32               | 2.49  | <0,00001 |
| ACP5     | 3433.9  | 131.8  | 331.7       | 15.9   | 382.1       | 36.8   | 356.9            | 37.6    | -3.26              | 0.10  | <0,00001 |
| ACRC     | 222.8   | 27.5   | 458.1       | 31.6   | 453.3       | 37.2   | 455.7            | 32.0    | 1.03               | 2.04  | <0,00001 |
| ADA      | 13550.5 | 1266.9 | 3832.5      | 78.4   | 4200.2      | 230.3  | 4016.3           | 252.9   | -1.75              | 0.30  | <0,00001 |
| ADAMTS5  | 5561.9  | 595.8  | 29092.4     | 2761.7 | 10646.9     | 631.1  | 19869.6          | 10032.4 | 1.71               | 3.28  | <0,00001 |
| ADGRL2   | 291.4   | 12.9   | 102.5       | 3.0    | 94.0        | 3.7    | 98.2             | 5.5     | -1.57              | 0.34  | <0,00001 |
| ADGRL3   | 165.8   | 20.7   | 52.4        | 4.4    | 50.1        | 0.7    | 51.2             | 3.1     | -1.69              | 0.31  | <0,00001 |
| ADRA2A   | 36.7    | 6.1    | 547.6       | 80.2   | 421.8       | 35.1   | 484.7            | 88.4    | 3.67               | 12.76 | <0,00001 |
| ADRA2C   | 157.8   | 10.5   | 2022.6      | 204.6  | 205.5       | 7.7    | 1114.1           | 980.5   | 2.18               | 4.52  | 0.00047  |
| ADTRP    | 7978.4  | 562.3  | 4470.1      | 197.2  | 2485.5      | 742.3  | 3477.8           | 1173.9  | -1.15              | 0.45  | 0.00007  |
| AIM1     | 35.6    | 4.4    | 47.1        | 4.3    | 122.7       | 12.4   | 84.9             | 41.3    | 1.17               | 2.26  | 0.00307  |
| AK7      | 99.6    | 7.4    | 41.8        | 1.0    | 35.4        | 3.5    | 38.6             | 4.2     | -1.36              | 0.39  | <0,00001 |
| AKR1B1   | 5571.9  | 113.0  | 17590.6     | 2686.0 | 7689.1      | 515.4  | 12639.8          | 5587.2  | 1.12               | 2.18  | 0.00074  |
| AKR1B10  | 37.3    | 1.7    | 65.5        | 1.9    | 322.0       | 16.7   | 193.8            | 137.6   | 2.05               | 4.14  | 0.00009  |
| AKR1C3   | 256.8   | 23.6   | 303.9       | 39.8   | 793.3       | 38.5   | 548.6            | 264.1   | 1.02               | 2.03  | 0.00698  |
| ALDH1A1  | 187.7   | 20.2   | 37.9        | 2.4    | 33.5        | 2.6    | 35.7             | 3.3     | -2.39              | 0.19  | <0,00001 |
| ALDH3B1  | 748.5   | 48.8   | 181.5       | 16.4   | 284.6       | 16.1   | 233.0            | 57.1    | -1.66              | 0.32  | <0,00001 |
| ALPK2    | 40.1    | 2.5    | 710.1       | 141.7  | 58.4        | 5.3    | 384.2            | 360.5   | 2.41               | 5.32  | 0.00019  |
| ALPK3    | 160.5   | 6.8    | 37.6        | 2.1    | 36.4        | 1.9    | 37.0             | 1.9     | -2.12              | 0.23  | <0,00001 |
| AMIGO2   | 3305.3  | 181.0  | 23702.5     | 1683.5 | 13099.1     | 1659.1 | 18400.8          | 5875.2  | 2.40               | 5.29  | <0,00001 |
| AMY1C    | 156.9   | 18.1   | 327.7       | 38.5   | 335.2       | 37.4   | 331.5            | 35.3    | 1.07               | 2.10  | <0,00001 |
| ANGPTL4  | 3921.3  | 188.0  | 33633.4     | 5158.9 | 13038.8     | 332.6  | 23336.1          | 11516.8 | 2.41               | 5.32  | <0,00001 |
| ANGPTL7  | 552.2   | 25.5   | 919.4       | 30.0   | 2421.7      | 432.4  | 1670.6           | 851.6   | 1.49               | 2.81  | 0.00005  |
| ANKRD1   | 1295.4  | 85.4   | 541.2       | 208.9  | 283.6       | 48.5   | 412.4            | 196.6   | -1.57              | 0.34  | <0,00001 |
| ANKRD18B | 158.9   | 24.5   | 62.3        | 1.4    | 45.9        | 5.0    | 54.1             | 9.4     | -1.54              | 0.34  | <0,00001 |
| ANKS1A   | 4533.3  | 181.0  | 2065.9      | 76.8   | 2206.8      | 48.8   | 2136.4           | 96.0    | -1.08              | 0.47  | <0,00001 |
| ANLN     | 234.5   | 12.5   | 124.3       | 7.3    | 60.1        | 1.3    | 92.2             | 34.7    | -1.30              | 0.41  | 0.00001  |
| ANO2     | 157.1   | 10.1   | 49.4        | 5.5    | 35.1        | 1.7    | 42.2             | 8.6     | -1.89              | 0.27  | <0,00001 |

|           |         |        |         |        |         |        |         |        |       |       |          |
|-----------|---------|--------|---------|--------|---------|--------|---------|--------|-------|-------|----------|
| ANXA1     | 15933.2 | 526.5  | 45528.4 | 1852.7 | 39568.4 | 3587.1 | 42548.4 | 4139.4 | 1.41  | 2.66  | <0,00001 |
| ANXA2P3   | 1293.1  | 149.5  | 3369.3  | 152.6  | 2117.1  | 201.6  | 2743.2  | 689.5  | 1.06  | 2.09  | <0,00001 |
| ANXA2R    | 133.0   | 5.2    | 57.5    | 4.5    | 66.3    | 3.9    | 61.9    | 6.1    | -1.10 | 0.47  | <0,00001 |
| AOX1      | 56.1    | 3.2    | 2692.8  | 584.3  | 113.1   | 4.7    | 1402.9  | 1431.0 | 2.97  | 7.84  | 0.00001  |
| APCDD1L   | 174.3   | 8.6    | 2212.9  | 180.1  | 1547.1  | 27.6   | 1880.0  | 375.3  | 3.39  | 10.47 | <0,00001 |
| AR        | 69.7    | 6.6    | 161.2   | 12.6   | 123.7   | 8.8    | 142.5   | 22.4   | 1.03  | 2.04  | <0,00001 |
| ARHGAP18  | 311.7   | 13.6   | 1063.4  | 43.3   | 830.6   | 44.5   | 947.0   | 130.9  | 1.59  | 3.02  | <0,00001 |
| ARHGAP22  | 497.9   | 7.6    | 4455.8  | 180.4  | 7688.7  | 214.3  | 6072.2  | 1737.7 | 3.52  | 11.49 | <0,00001 |
| ARHGAP31  | 45.3    | 2.0    | 147.5   | 9.6    | 59.4    | 6.2    | 103.4   | 47.6   | 1.12  | 2.17  | 0.00309  |
| ARHGDIB   | 736.2   | 33.3   | 168.5   | 8.8    | 104.9   | 8.8    | 136.7   | 34.9   | -2.39 | 0.19  | <0,00001 |
| ARHGEF16  | 429.7   | 20.7   | 56.3    | 3.8    | 48.6    | 1.7    | 52.5    | 4.9    | -3.03 | 0.12  | <0,00001 |
| ARHGEF19  | 130.9   | 10.2   | 487.9   | 29.6   | 183.5   | 9.1    | 335.7   | 163.9  | 1.27  | 2.42  | 0.00081  |
| ARHGEF3   | 3148.5  | 128.0  | 521.6   | 36.6   | 639.2   | 18.2   | 580.4   | 68.3   | -2.43 | 0.19  | <0,00001 |
| ARL4C     | 1941.8  | 336.9  | 3318.6  | 422.3  | 11227.0 | 1195.5 | 7272.8  | 4307.9 | 1.72  | 3.30  | 0.00008  |
| ARNT2     | 4441.9  | 178.1  | 1711.5  | 57.0   | 2211.4  | 80.0   | 1961.4  | 274.9  | -1.17 | 0.44  | <0,00001 |
| ART5      | 261.7   | 19.4   | 54.0    | 17.6   | 65.6    | 3.1    | 59.8    | 13.3   | -2.12 | 0.23  | <0,00001 |
| ASL       | 345.1   | 29.5   | 816.1   | 83.7   | 723.2   | 69.4   | 769.6   | 86.8   | 1.15  | 2.22  | <0,00001 |
| ASPN      | 189.2   | 12.1   | 48.1    | 1.4    | 88.5    | 10.1   | 68.3    | 22.6   | -1.44 | 0.37  | <0,00001 |
| ASS1      | 567.1   | 45.7   | 188.9   | 18.2   | 173.1   | 14.4   | 181.0   | 17.4   | -1.64 | 0.32  | <0,00001 |
| ATP6AP1L  | 127.4   | 8.1    | 220.9   | 13.0   | 322.1   | 22.9   | 271.5   | 56.7   | 1.08  | 2.11  | <0,00001 |
| ATP6V0A4  | 202.9   | 15.6   | 87.9    | 7.6    | 55.2    | 4.0    | 71.5    | 18.4   | -1.48 | 0.36  | <0,00001 |
| ATP6V1B2  | 9860.1  | 113.3  | 4053.7  | 77.0   | 4288.8  | 146.7  | 4171.3  | 166.0  | -1.24 | 0.42  | <0,00001 |
| ATP6V1G2  | 110.6   | 11.7   | 826.1   | 26.9   | 849.2   | 46.6   | 837.6   | 37.3   | 2.91  | 7.54  | <0,00001 |
| B3GAT1    | 343.0   | 28.1   | 2054.4  | 203.3  | 455.4   | 23.6   | 1254.9  | 865.2  | 1.63  | 3.10  | 0.00123  |
| B3GNT5    | 227.1   | 9.5    | 146.7   | 5.2    | 57.0    | 3.5    | 101.9   | 48.2   | -1.09 | 0.47  | 0.00299  |
| BAG2      | 4780.9  | 92.1   | 1810.0  | 84.6   | 2268.2  | 84.0   | 2039.1  | 257.0  | -1.22 | 0.43  | <0,00001 |
| BEND5     | 193.4   | 15.3   | 88.8    | 9.5    | 66.8    | 6.2    | 77.8    | 13.9   | -1.30 | 0.41  | <0,00001 |
| BEST1     | 171.5   | 55.5   | 54.2    | 2.6    | 39.6    | 3.6    | 46.9    | 8.3    | -1.83 | 0.28  | <0,00001 |
| BEX2      | 50948.8 | 1194.2 | 17636.6 | 1500.5 | 16016.2 | 595.0  | 16826.4 | 1366.3 | -1.59 | 0.33  | <0,00001 |
| BEX5      | 233.1   | 8.4    | 87.4    | 2.6    | 39.4    | 3.0    | 63.4    | 25.8   | -1.80 | 0.29  | <0,00001 |
| BGN       | 879.4   | 32.4   | 39.5    | 3.0    | 73.5    | 3.5    | 56.5    | 18.4   | -3.88 | 0.07  | <0,00001 |
| BHLHE41   | 2185.8  | 76.7   | 12869.9 | 457.8  | 3144.7  | 168.6  | 8007.3  | 5208.1 | 1.66  | 3.16  | 0.00052  |
| BICC1     | 39.6    | 2.2    | 62.9    | 5.3    | 180.4   | 2.6    | 121.7   | 62.9   | 1.50  | 2.83  | 0.00023  |
| BIRC3     | 51.7    | 2.0    | 760.6   | 162.1  | 46.8    | 1.8    | 403.7   | 396.1  | 2.10  | 4.28  | 0.00206  |
| BMP6      | 3018.1  | 158.0  | 1195.1  | 88.8   | 198.7   | 2.3    | 696.9   | 535.7  | -1.79 | 0.29  | 0.00128  |
| BNIP3     | 15476.1 | 1556.0 | 25858.2 | 2116.5 | 41434.3 | 885.0  | 33646.2 | 8460.1 | 1.10  | 2.14  | <0,00001 |
| BPIFB4    | 174.6   | 15.1   | 36.9    | 1.0    | 41.0    | 1.6    | 38.9    | 2.5    | -2.16 | 0.22  | <0,00001 |
| BPIFC     | 68.6    | 3.7    | 33.1    | 2.4    | 31.7    | 1.0    | 32.4    | 1.9    | -1.08 | 0.47  | <0,00001 |
| BSCL2     | 671.2   | 44.9   | 1027.4  | 74.5   | 1795.7  | 183.2  | 1411.6  | 430.6  | 1.04  | 2.06  | 0.00001  |
| BST1      | 114.6   | 10.6   | 68.3    | 2.4    | 43.0    | 3.4    | 55.6    | 13.8   | -1.03 | 0.49  | <0,00001 |
| BST2      | 71.4    | 4.5    | 78.8    | 12.3   | 346.8   | 83.1   | 212.8   | 153.5  | 1.37  | 2.59  | 0.00867  |
| C10orf107 | 67.6    | 3.8    | 189.7   | 21.6   | 470.8   | 31.2   | 330.3   | 152.3  | 2.15  | 4.45  | <0,00001 |
| C10orf11  | 88.2    | 10.5   | 418.7   | 57.2   | 353.9   | 17.7   | 386.3   | 52.3   | 2.12  | 4.33  | <0,00001 |

|          |        |       |         |        |         |        |         |         |       |       |          |
|----------|--------|-------|---------|--------|---------|--------|---------|---------|-------|-------|----------|
| C11orf52 | 109.4  | 6.8   | 36.3    | 2.4    | 35.2    | 1.6    | 35.8    | 2.0     | -1.61 | 0.33  | <0,00001 |
| C17orf97 | 279.1  | 21.6  | 127.2   | 5.7    | 134.7   | 3.3    | 130.9   | 5.9     | -1.09 | 0.47  | <0,00001 |
| C19orf60 | 1621.6 | 61.6  | 3541.3  | 82.9   | 3344.2  | 109.9  | 3442.8  | 138.6   | 1.09  | 2.12  | <0,00001 |
| C1orf132 | 52.5   | 3.9   | 552.8   | 68.8   | 808.9   | 197.5  | 680.9   | 193.6   | 3.62  | 12.30 | <0,00001 |
| C1orf233 | 304.2  | 26.6  | 1651.9  | 201.7  | 998.8   | 49.1   | 1325.3  | 374.7   | 2.07  | 4.21  | <0,00001 |
| C1orf53  | 263.0  | 29.4  | 1676.2  | 69.8   | 875.9   | 60.3   | 1276.0  | 432.0   | 2.20  | 4.61  | <0,00001 |
| C1QL1    | 60.2   | 7.2   | 88.9    | 4.5    | 430.0   | 33.5   | 259.5   | 183.7   | 1.82  | 3.53  | 0.00047  |
| C2orf15  | 195.1  | 7.7   | 75.4    | 9.0    | 53.2    | 1.8    | 64.3    | 13.3    | -1.58 | 0.33  | <0,00001 |
| C2orf74  | 322.0  | 20.9  | 635.8   | 28.8   | 850.7   | 12.6   | 743.2   | 116.7   | 1.20  | 2.29  | <0,00001 |
| C3       | 145.6  | 8.3   | 13215.1 | 3320.2 | 1775.4  | 290.7  | 7495.3  | 6492.4  | 4.46  | 21.96 | <0,00001 |
| C4orf19  | 235.5  | 18.5  | 107.7   | 15.9   | 36.7    | 1.7    | 72.2    | 39.4    | -1.58 | 0.33  | 0.00007  |
| C4orf26  | 35.0   | 1.4   | 249.2   | 66.1   | 67.2    | 9.0    | 158.2   | 106.7   | 1.93  | 3.81  | 0.00006  |
| C5orf30  | 640.6  | 44.3  | 1729.3  | 203.2  | 919.1   | 36.6   | 1324.2  | 453.7   | 1.01  | 2.02  | 0.00015  |
| C6orf15  | 35.5   | 2.2   | 78.0    | 14.2   | 89.7    | 6.5    | 83.8    | 12.0    | 1.24  | 2.36  | <0,00001 |
| C7orf69  | 63.7   | 5.6   | 80.3    | 9.1    | 994.6   | 37.2   | 537.5   | 489.3   | 2.28  | 4.86  | 0.00043  |
| CA14     | 3712.0 | 145.1 | 79.6    | 3.9    | 248.5   | 17.0   | 164.0   | 91.0    | -4.16 | 0.06  | <0,00001 |
| CA2      | 106.2  | 7.2   | 40.6    | 3.0    | 37.7    | 2.9    | 39.1    | 3.2     | -1.44 | 0.37  | <0,00001 |
| CACNA2D1 | 37.6   | 2.0   | 97.8    | 12.5   | 154.9   | 8.2    | 126.4   | 32.0    | 1.72  | 3.29  | <0,00001 |
| CADPS2   | 214.3  | 10.3  | 64.7    | 1.2    | 41.6    | 1.2    | 53.1    | 12.4    | -2.00 | 0.25  | <0,00001 |
| CALB2    | 35.7   | 1.2   | 154.1   | 22.7   | 71.7    | 9.8    | 112.9   | 46.9    | 1.58  | 3.00  | <0,00001 |
| CAMSAP3  | 432.8  | 19.4  | 113.3   | 4.2    | 116.0   | 10.6   | 114.6   | 7.6     | -1.91 | 0.27  | <0,00001 |
| CAPG     | 3233.9 | 97.6  | 1084.5  | 104.0  | 2006.7  | 100.7  | 1545.6  | 501.9   | -1.04 | 0.49  | 0.00004  |
| CARD6    | 93.1   | 7.3   | 2084.7  | 121.8  | 2127.3  | 66.1   | 2106.0  | 93.6    | 4.49  | 22.48 | <0,00001 |
| CASP1    | 32.5   | 1.0   | 150.1   | 16.1   | 117.6   | 10.5   | 133.8   | 21.5    | 2.03  | 4.07  | <0,00001 |
| CCDC153  | 383.7  | 14.7  | 157.2   | 10.4   | 115.2   | 6.6    | 136.2   | 23.8    | -1.48 | 0.36  | <0,00001 |
| CCDC176  | 218.7  | 11.2  | 417.1   | 11.6   | 487.9   | 17.4   | 452.5   | 40.3    | 1.05  | 2.06  | <0,00001 |
| CCDC3    | 79.0   | 3.0   | 187.4   | 7.5    | 665.2   | 27.8   | 426.3   | 256.1   | 2.19  | 4.57  | <0,00001 |
| CCDC51   | 4383.9 | 150.5 | 1636.1  | 103.6  | 2421.6  | 186.3  | 2028.9  | 442.4   | -1.10 | 0.47  | <0,00001 |
| CCDC68   | 38.5   | 2.8   | 62.3    | 3.6    | 110.8   | 18.8   | 86.6    | 28.8    | 1.13  | 2.19  | 0.00005  |
| CCDC8    | 1322.4 | 102.5 | 48.0    | 1.4    | 45.4    | 2.3    | 46.7    | 2.3     | -4.81 | 0.04  | <0,00001 |
| CCIN     | 78.3   | 7.1   | 206.5   | 22.3   | 128.9   | 18.4   | 167.7   | 45.6    | 1.08  | 2.11  | 0.00001  |
| CCIL11   | 32.7   | 1.8   | 34.2    | 1.5    | 218.8   | 11.7   | 126.5   | 99.0    | 1.61  | 3.05  | 0.00622  |
| CCIL2    | 3913.5 | 71.2  | 3569.5  | 464.4  | 34837.9 | 3164.6 | 19203.7 | 16844.3 | 1.78  | 3.44  | 0.00480  |
| CCIL7    | 29.5   | 0.8   | 95.5    | 19.3   | 4234.7  | 683.7  | 2165.1  | 2257.4  | 2.90  | 7.47  | 0.00007  |
| CD24     | 5536.1 | 256.2 | 86.0    | 7.2    | 521.3   | 52.7   | 303.7   | 235.3   | -3.57 | 0.08  | <0,00001 |
| CD248    | 210.1  | 14.4  | 80.1    | 6.2    | 120.7   | 4.8    | 100.4   | 22.3    | -1.06 | 0.48  | <0,00001 |
| CD68     | 398.7  | 23.7  | 619.5   | 53.2   | 1465.3  | 102.8  | 1042.4  | 458.4   | 1.31  | 2.48  | 0.00009  |
| CD70     | 43.0   | 2.2   | 75.6    | 2.7    | 1729.7  | 105.0  | 902.6   | 886.8   | 2.86  | 7.26  | 0.00003  |
| CD82     | 755.7  | 87.7  | 2947.8  | 544.7  | 1561.0  | 123.8  | 2254.4  | 826.6   | 1.52  | 2.87  | <0,00001 |
| CDA      | 42.6   | 3.6   | 275.9   | 55.7   | 50.2    | 6.8    | 163.0   | 126.1   | 1.63  | 3.09  | 0.00394  |
| CDH11    | 3754.7 | 282.0 | 29176.7 | 1403.0 | 5496.1  | 307.3  | 17336.4 | 12692.7 | 1.88  | 3.69  | 0.00038  |
| CDKL2    | 113.5  | 14.5  | 54.9    | 4.3    | 55.0    | 1.7    | 55.0    | 3.0     | -1.05 | 0.48  | <0,00001 |
| CDKN2C   | 223.1  | 5.7   | 271.7   | 13.4   | 808.3   | 13.7   | 540.0   | 287.1   | 1.18  | 2.26  | 0.00387  |

|         |        |       |         |        |        |       |        |        |       |       |          |
|---------|--------|-------|---------|--------|--------|-------|--------|--------|-------|-------|----------|
| CDKN3   | 784.3  | 43.5  | 176.9   | 12.3   | 309.8  | 23.5  | 243.3  | 73.1   | -1.65 | 0.32  | <0,00001 |
| CDO1    | 5526.4 | 12.3  | 354.0   | 15.8   | 2510.3 | 259.6 | 1432.2 | 1165.1 | -1.62 | 0.33  | 0.00602  |
| CDX1    | 70.8   | 3.3   | 81.3    | 7.1    | 288.1  | 31.7  | 184.7  | 112.6  | 1.25  | 2.37  | 0.00764  |
| CENPV   | 318.0  | 30.3  | 132.7   | 10.4   | 62.0   | 2.8   | 97.3   | 38.4   | -1.64 | 0.32  | <0,00001 |
| CENPVP1 | 191.9  | 9.7   | 51.1    | 3.8    | 51.4   | 2.6   | 51.3   | 3.0    | -1.90 | 0.27  | <0,00001 |
| CH25H   | 29.0   | 0.9   | 33.6    | 1.5    | 700.5  | 75.5  | 367.0  | 359.9  | 2.45  | 5.47  | 0.00038  |
| CHCHD10 | 4382.2 | 126.2 | 897.0   | 34.5   | 2083.3 | 99.4  | 1490.1 | 637.9  | -1.48 | 0.36  | <0,00001 |
| CHEK2   | 184.8  | 11.4  | 456.5   | 51.9   | 373.5  | 4.3   | 415.0  | 56.0   | 1.16  | 2.24  | <0,00001 |
| CHI3L2  | 31.6   | 2.0   | 127.0   | 17.0   | 156.4  | 13.3  | 141.7  | 21.1   | 2.15  | 4.44  | <0,00001 |
| CHODL   | 254.1  | 10.9  | 79.9    | 9.9    | 84.4   | 2.3   | 82.1   | 7.1    | -1.63 | 0.32  | <0,00001 |
| CHST1   | 105.5  | 8.9   | 45.3    | 2.2    | 35.8   | 2.7   | 40.5   | 5.6    | -1.38 | 0.39  | <0,00001 |
| CHST6   | 114.4  | 9.5   | 158.3   | 34.2   | 502.2  | 32.5  | 330.2  | 186.4  | 1.39  | 2.63  | 0.00132  |
| CHST7   | 467.1  | 16.6  | 853.6   | 94.5   | 1375.7 | 26.6  | 1114.6 | 286.4  | 1.23  | 2.35  | <0,00001 |
| CHSY3   | 205.1  | 14.3  | 85.7    | 8.1    | 93.4   | 4.5   | 89.6   | 7.4    | -1.19 | 0.44  | <0,00001 |
| CILP    | 39.0   | 2.3   | 45.9    | 2.0    | 1317.9 | 114.7 | 681.9  | 684.1  | 2.60  | 6.07  | 0.00021  |
| CIT     | 49.7   | 3.2   | 152.3   | 11.9   | 214.1  | 6.2   | 183.2  | 34.2   | 1.87  | 3.66  | <0,00001 |
| CKMT2   | 60.3   | 8.1   | 102.7   | 5.5    | 239.8  | 14.5  | 171.3  | 74.0   | 1.42  | 2.68  | 0.00004  |
| CLCNKA  | 85.1   | 7.3   | 38.3    | 2.1    | 38.3   | 2.1   | 38.3   | 1.9    | -1.14 | 0.45  | <0,00001 |
| CLDN14  | 163.6  | 12.0  | 49.3    | 4.4    | 81.7   | 6.1   | 65.5   | 18.0   | -1.31 | 0.40  | <0,00001 |
| CLDN19  | 146.0  | 16.3  | 39.5    | 0.8    | 35.4   | 1.3   | 37.5   | 2.4    | -1.96 | 0.26  | <0,00001 |
| CLDND1  | 6806.4 | 330.4 | 1430.6  | 36.7   | 1442.9 | 83.9  | 1436.8 | 60.3   | -2.24 | 0.21  | <0,00001 |
| CLGN    | 3099.0 | 253.1 | 973.7   | 44.7   | 389.4  | 9.8   | 681.6  | 313.7  | -2.06 | 0.24  | <0,00001 |
| CLIC6   | 9867.7 | 536.1 | 1033.5  | 47.9   | 927.7  | 94.4  | 980.6  | 89.4   | -3.32 | 0.10  | <0,00001 |
| CLUL1   | 87.0   | 3.9   | 37.7    | 2.7    | 47.0   | 2.2   | 42.3   | 5.5    | -1.04 | 0.49  | <0,00001 |
| CMTM2   | 77.9   | 3.4   | 33.4    | 2.4    | 41.5   | 2.5   | 37.4   | 4.9    | -1.06 | 0.48  | <0,00001 |
| CNIH3   | 111.1  | 6.3   | 1089.4  | 65.9   | 476.9  | 30.1  | 783.2  | 330.8  | 2.68  | 6.39  | <0,00001 |
| CNTN6   | 475.9  | 32.7  | 40.5    | 2.1    | 38.1   | 1.7   | 39.3   | 2.2    | -3.59 | 0.08  | <0,00001 |
| CNTNAP1 | 112.0  | 7.9   | 309.0   | 22.4   | 341.1  | 34.0  | 325.0  | 31.7   | 1.53  | 2.89  | <0,00001 |
| COL10A1 | 47.8   | 3.4   | 1546.5  | 200.8  | 466.2  | 48.7  | 1006.3 | 593.1  | 3.97  | 15.68 | <0,00001 |
| COL11A2 | 971.7  | 80.7  | 110.5   | 6.1    | 306.3  | 34.2  | 208.4  | 107.1  | -2.08 | 0.24  | <0,00001 |
| COL13A1 | 37.0   | 0.9   | 384.9   | 52.4   | 43.4   | 2.5   | 214.1  | 185.7  | 1.99  | 3.97  | 0.00138  |
| COL22A1 | 81.5   | 1.4   | 30.8    | 2.1    | 32.7   | 0.8   | 31.7   | 1.8    | -1.36 | 0.39  | <0,00001 |
| COL4A4  | 534.1  | 111.4 | 2473.2  | 583.4  | 852.3  | 162.8 | 1662.7 | 952.8  | 1.50  | 2.83  | 0.00038  |
| COL7A1  | 1057.8 | 132.0 | 2157.7  | 146.6  | 3485.8 | 169.3 | 2821.8 | 724.9  | 1.39  | 2.61  | <0,00001 |
| COL8A2  | 1192.6 | 155.3 | 13130.6 | 2575.8 | 5637.1 | 70.7  | 9383.8 | 4346.2 | 2.81  | 7.02  | <0,00001 |
| COL9A2  | 6135.6 | 454.3 | 410.0   | 69.6   | 689.9  | 52.7  | 549.9  | 160.2  | -3.40 | 0.09  | <0,00001 |
| COL9A3  | 3680.9 | 670.4 | 394.2   | 25.3   | 234.1  | 28.0  | 314.1  | 89.1   | -3.46 | 0.09  | <0,00001 |
| COPZ2   | 859.6  | 15.0  | 3984.7  | 405.3  | 6813.0 | 215.2 | 5398.9 | 1541.3 | 2.59  | 6.01  | <0,00001 |
| CORO2B  | 110.9  | 11.3  | 666.7   | 56.3   | 909.6  | 117.5 | 788.1  | 155.3  | 2.79  | 6.93  | <0,00001 |
| CP      | 63.5   | 10.1  | 37.1    | 1.9    | 838.5  | 88.1  | 437.8  | 432.2  | 1.88  | 3.67  | 0.00847  |
| CPAMD8  | 136.3  | 13.0  | 311.4   | 30.3   | 241.0  | 14.9  | 276.2  | 43.6   | 1.01  | 2.01  | <0,00001 |
| CPE     | 1785.8 | 130.2 | 4000.6  | 331.0  | 5876.1 | 460.9 | 4938.3 | 1069.1 | 1.45  | 2.73  | <0,00001 |
| CPNE5   | 751.7  | 38.6  | 67.9    | 4.1    | 89.2   | 6.1   | 78.5   | 12.4   | -3.25 | 0.11  | <0,00001 |

|          |         |        |        |        |         |       |        |        |       |       |          |
|----------|---------|--------|--------|--------|---------|-------|--------|--------|-------|-------|----------|
| CPZ      | 90.8    | 8.6    | 102.2  | 7.9    | 1368.0  | 95.7  | 735.1  | 679.5  | 2.21  | 4.62  | 0.00075  |
| CRB2     | 244.2   | 11.5   | 141.8  | 13.7   | 38.9    | 3.6   | 90.4   | 55.8   | -1.30 | 0.41  | 0.00554  |
| CRB3     | 181.2   | 7.2    | 82.9   | 2.7    | 61.6    | 4.8   | 72.2   | 12.0   | -1.32 | 0.40  | <0,00001 |
| CRH      | 38.8    | 3.5    | 309.3  | 74.3   | 3048.0  | 158.9 | 1678.7 | 1468.4 | 4.05  | 16.61 | <0,00001 |
| CRIP1    | 154.2   | 21.9   | 1549.6 | 249.3  | 441.1   | 14.2  | 995.3  | 614.6  | 2.42  | 5.35  | <0,00001 |
| CRISPLD1 | 803.1   | 61.6   | 75.3   | 5.4    | 194.3   | 6.9   | 134.8  | 63.9   | -2.43 | 0.19  | <0,00001 |
| CRNDE    | 1240.3  | 112.0  | 2378.2 | 157.5  | 3875.8  | 352.1 | 3127.0 | 839.4  | 1.31  | 2.47  | <0,00001 |
| CRTAC1   | 146.7   | 14.2   | 38.0   | 0.9    | 41.3    | 2.2   | 39.6   | 2.3    | -1.89 | 0.27  | <0,00001 |
| CRYM     | 526.0   | 34.9   | 54.2   | 1.0    | 85.2    | 3.5   | 69.7   | 16.7   | -2.88 | 0.14  | <0,00001 |
| CSF1R    | 16631.9 | 632.6  | 626.1  | 24.4   | 2262.4  | 155.4 | 1444.2 | 880.7  | -3.20 | 0.11  | <0,00001 |
| CSPG4    | 469.6   | 35.4   | 943.7  | 26.8   | 3826.0  | 327.4 | 2384.8 | 1555.6 | 2.08  | 4.22  | 0.00001  |
| CSPG5    | 115.0   | 6.5    | 59.3   | 4.6    | 48.9    | 1.7   | 54.1   | 6.4    | -1.09 | 0.47  | <0,00001 |
| CSRNP1   | 1428.7  | 76.0   | 595.9  | 29.9   | 673.9   | 53.8  | 634.9  | 58.0   | -1.17 | 0.45  | <0,00001 |
| CTSH     | 15738.6 | 1217.9 | 1812.6 | 132.1  | 1341.5  | 46.3  | 1577.0 | 268.0  | -3.29 | 0.10  | <0,00001 |
| CTSK     | 1069.2  | 104.7  | 2759.4 | 228.1  | 3349.9  | 98.7  | 3054.7 | 355.1  | 1.51  | 2.84  | <0,00001 |
| CTSL     | 53116.9 | 1612.8 | 5862.7 | 236.9  | 11787.7 | 987.1 | 8825.2 | 3236.0 | -2.50 | 0.18  | <0,00001 |
| CTSO     | 79.5    | 6.8    | 173.9  | 2.8    | 200.8   | 13.4  | 187.4  | 16.9   | 1.23  | 2.35  | <0,00001 |
| CTSV     | 88083.5 | 8026.7 | 247.2  | 9.8    | 7286.1  | 563.9 | 3766.6 | 3780.5 | -3.20 | 0.11  | <0,00001 |
| CTSZ     | 660.2   | 159.1  | 1919.5 | 713.1  | 1185.4  | 105.1 | 1552.5 | 613.7  | 1.19  | 2.28  | 0.00004  |
| CXADRP3  | 1204.0  | 101.2  | 713.1  | 42.2   | 234.3   | 16.4  | 473.7  | 257.6  | -1.24 | 0.42  | 0.00284  |
| CXCL1    | 494.4   | 26.9   | 1432.8 | 176.5  | 2671.7  | 278.3 | 2052.3 | 696.5  | 1.99  | 3.97  | <0,00001 |
| CXCL14   | 11864.2 | 1356.5 | 558.6  | 92.8   | 228.5   | 22.5  | 393.6  | 187.2  | -4.63 | 0.04  | <0,00001 |
| CXCL8    | 29.1    | 1.0    | 49.9   | 5.1    | 112.2   | 19.1  | 81.0   | 35.8   | 1.41  | 2.66  | 0.00007  |
| CXXC4    | 214.2   | 27.5   | 34.6   | 2.5    | 57.1    | 1.7   | 45.9   | 12.2   | -2.19 | 0.22  | <0,00001 |
| CYB5R2   | 7383.3  | 880.1  | 3350.8 | 205.2  | 2458.8  | 311.1 | 2904.8 | 535.6  | -1.33 | 0.40  | <0,00001 |
| CYP26A1  | 1396.8  | 74.7   | 40.1   | 2.3    | 39.4    | 3.0   | 39.8   | 2.5    | -5.13 | 0.03  | <0,00001 |
| CYP27A1  | 667.8   | 68.6   | 129.3  | 6.7    | 265.4   | 19.2  | 197.4  | 73.9   | -1.70 | 0.31  | <0,00001 |
| CYP2J2   | 318.0   | 8.5    | 101.5  | 11.6   | 37.6    | 2.6   | 69.5   | 35.0   | -2.06 | 0.24  | <0,00001 |
| CYP39A1  | 95.3    | 6.0    | 40.5   | 2.1    | 37.5    | 2.7   | 39.0   | 2.8    | -1.29 | 0.41  | <0,00001 |
| CYTIP    | 228.4   | 8.7    | 40.1   | 1.1    | 70.1    | 6.6   | 55.1   | 16.7   | -2.02 | 0.25  | <0,00001 |
| CYTL1    | 1152.1  | 23.1   | 36.7   | 1.8    | 158.3   | 10.1  | 97.5   | 65.4   | -3.17 | 0.11  | <0,00001 |
| DAB2     | 2728.0  | 71.9   | 7753.0 | 1121.2 | 9176.3  | 448.0 | 8464.7 | 1097.1 | 1.62  | 3.08  | <0,00001 |
| DACH1    | 609.1   | 24.2   | 244.4  | 33.0   | 107.6   | 11.4  | 176.0  | 76.6   | -1.70 | 0.31  | <0,00001 |
| DAND5    | 52.2    | 5.3    | 54.4   | 2.4    | 354.9   | 26.8  | 204.7  | 161.6  | 1.62  | 3.08  | 0.00553  |
| DAPP1    | 73.9    | 3.1    | 35.8   | 1.6    | 37.8    | 1.9   | 36.8   | 1.9    | -1.00 | 0.50  | <0,00001 |
| DCHS1    | 375.8   | 17.9   | 48.9   | 2.7    | 92.6    | 12.2  | 70.7   | 24.8   | -2.35 | 0.20  | <0,00001 |
| DCPS     | 2777.5  | 134.5  | 1454.4 | 23.2   | 1275.0  | 67.0  | 1364.7 | 106.5  | -1.02 | 0.49  | <0,00001 |
| DCUN1D3  | 1122.0  | 39.1   | 2147.5 | 140.3  | 3791.9  | 210.8 | 2969.7 | 894.4  | 1.37  | 2.58  | <0,00001 |
| DCX      | 361.7   | 64.5   | 39.2   | 1.9    | 57.9    | 6.6   | 48.5   | 11.0   | -2.87 | 0.14  | <0,00001 |
| DDB2     | 8705.9  | 570.8  | 1624.0 | 125.4  | 5378.3  | 276.7 | 3501.1 | 2016.6 | -1.20 | 0.43  | 0.00584  |
| DDIT4L   | 527.8   | 62.1   | 1764.8 | 181.5  | 2200.1  | 221.9 | 1982.4 | 298.9  | 1.89  | 3.72  | <0,00001 |
| DENND1C  | 118.9   | 9.8    | 44.2   | 1.2    | 38.1    | 2.5   | 41.2   | 3.8    | -1.53 | 0.35  | <0,00001 |
| DEPDC1B  | 144.4   | 19.1   | 46.1   | 5.1    | 37.6    | 1.2   | 41.8   | 5.7    | -1.77 | 0.29  | <0,00001 |

|           |         |        |         |        |         |        |         |        |       |      |          |
|-----------|---------|--------|---------|--------|---------|--------|---------|--------|-------|------|----------|
| DEPDC7    | 142.7   | 11.1   | 1468.9  | 107.3  | 429.7   | 22.6   | 949.3   | 560.1  | 2.47  | 5.56 | <0,00001 |
| DEPTOR    | 45.8    | 2.9    | 65.1    | 2.5    | 164.5   | 14.7   | 114.8   | 54.0   | 1.25  | 2.38 | 0.00077  |
| DERA      | 2303.3  | 124.4  | 4676.9  | 127.5  | 5300.2  | 308.6  | 4988.6  | 398.5  | 1.11  | 2.16 | <0,00001 |
| DGKD      | 7426.1  | 287.8  | 3684.6  | 216.0  | 3250.0  | 274.0  | 3467.3  | 325.8  | -1.09 | 0.47 | <0,00001 |
| DGKI      | 95.6    | 2.6    | 135.7   | 10.0   | 343.4   | 21.6   | 239.6   | 112.1  | 1.25  | 2.37 | 0.00060  |
| DHX58     | 569.0   | 65.1   | 1218.6  | 103.8  | 1402.2  | 108.0  | 1310.4  | 138.7  | 1.20  | 2.29 | <0,00001 |
| DIO3      | 39.5    | 0.2    | 195.2   | 13.7   | 51.0    | 4.1    | 123.1   | 77.7   | 1.46  | 2.75 | 0.00281  |
| DISP2     | 399.5   | 16.9   | 890.1   | 49.7   | 3014.1  | 28.0   | 1952.1  | 1136.0 | 2.08  | 4.23 | <0,00001 |
| DMKN      | 10193.2 | 478.1  | 1236.9  | 189.0  | 153.5   | 15.6   | 695.2   | 592.2  | -3.16 | 0.11 | <0,00001 |
| DNAAF2    | 4137.0  | 193.5  | 2021.5  | 94.6   | 1754.1  | 72.6   | 1887.8  | 162.9  | -1.13 | 0.46 | <0,00001 |
| DNAJB4    | 663.4   | 63.6   | 2716.5  | 200.7  | 1018.5  | 101.4  | 1867.5  | 919.5  | 1.40  | 2.63 | 0.00019  |
| DNAJC15   | 1666.0  | 83.6   | 3843.8  | 152.6  | 3300.3  | 156.4  | 3572.1  | 323.8  | 1.10  | 2.14 | <0,00001 |
| DNASE1L1  | 2222.1  | 101.8  | 596.6   | 22.6   | 1444.8  | 88.4   | 1020.7  | 457.3  | -1.07 | 0.48 | 0.00188  |
| DNMBP     | 119.8   | 4.3    | 290.3   | 23.3   | 228.1   | 8.5    | 259.2   | 37.0   | 1.11  | 2.16 | <0,00001 |
| DNTTIP1   | 3091.9  | 74.3   | 4384.1  | 70.8   | 9235.7  | 399.1  | 6809.9  | 2606.8 | 1.09  | 2.13 | 0.00019  |
| DOCK9-AS2 | 412.7   | 33.0   | 205.1   | 18.3   | 184.9   | 24.1   | 195.0   | 22.5   | -1.08 | 0.47 | <0,00001 |
| DPP10-AS1 | 263.1   | 10.9   | 34.5    | 1.8    | 32.5    | 2.3    | 33.5    | 2.2    | -2.97 | 0.13 | <0,00001 |
| DPP4      | 38.0    | 0.8    | 166.9   | 17.0   | 232.3   | 25.1   | 199.6   | 40.2   | 2.37  | 5.16 | <0,00001 |
| DSC1      | 92.3    | 13.1   | 33.7    | 2.7    | 54.4    | 2.9    | 44.1    | 11.3   | -1.06 | 0.48 | <0,00001 |
| DUSP26    | 20903.1 | 1033.2 | 4065.5  | 313.3  | 8497.4  | 492.5  | 6281.4  | 2399.6 | -1.67 | 0.31 | <0,00001 |
| DUSP4     | 217.5   | 18.6   | 804.8   | 145.5  | 1208.3  | 42.9   | 1006.6  | 237.4  | 2.17  | 4.51 | <0,00001 |
| DUXAP10   | 47.2    | 2.5    | 138.1   | 15.9   | 69.6    | 9.0    | 103.8   | 38.5   | 1.09  | 2.13 | 0.00046  |
| DUXAP8    | 33.0    | 2.5    | 178.1   | 10.2   | 62.4    | 2.2    | 120.2   | 62.2   | 1.74  | 3.34 | 0.00002  |
| E2F5      | 1075.9  | 50.1   | 456.7   | 35.5   | 383.8   | 22.3   | 420.3   | 47.7   | -1.35 | 0.39 | <0,00001 |
| E2F7      | 190.6   | 12.7   | 302.9   | 35.0   | 487.4   | 17.9   | 395.1   | 101.9  | 1.03  | 2.04 | <0,00001 |
| EBF4      | 2273.0  | 150.4  | 616.1   | 14.5   | 433.8   | 38.0   | 524.9   | 101.0  | -2.09 | 0.23 | <0,00001 |
| ECM1      | 192.6   | 21.2   | 234.4   | 20.8   | 1127.8  | 99.7   | 681.1   | 482.1  | 1.57  | 2.98 | 0.00253  |
| EDIL3     | 778.6   | 75.7   | 4482.1  | 1164.8 | 1477.7  | 293.7  | 2979.9  | 1788.2 | 1.77  | 3.41 | 0.00003  |
| EEF1A2    | 6433.9  | 376.1  | 1523.5  | 174.3  | 113.2   | 3.9    | 818.3   | 762.4  | -2.27 | 0.21 | 0.00050  |
| EFR3B     | 1549.0  | 104.2  | 4959.6  | 456.9  | 1996.0  | 79.6   | 3477.8  | 1613.0 | 1.10  | 2.14 | 0.00207  |
| EFS       | 817.0   | 57.0   | 40.2    | 2.5    | 45.1    | 2.6    | 42.7    | 3.5    | -4.25 | 0.05 | <0,00001 |
| EGF       | 35.3    | 4.6    | 155.7   | 39.8   | 51.3    | 8.6    | 103.5   | 61.8   | 1.41  | 2.66 | 0.00177  |
| EGFLAM    | 141.9   | 4.2    | 37.6    | 1.7    | 50.7    | 3.1    | 44.1    | 7.4    | -1.68 | 0.31 | <0,00001 |
| EGR2      | 64.0    | 1.0    | 112.8   | 19.0   | 2131.9  | 169.7  | 1122.3  | 1085.0 | 2.80  | 6.97 | 0.00003  |
| EID3      | 164.2   | 13.4   | 497.0   | 15.6   | 501.2   | 25.3   | 499.1   | 19.6   | 1.60  | 3.04 | <0,00001 |
| ELAC1     | 238.4   | 21.5   | 689.8   | 21.0   | 589.4   | 28.7   | 639.6   | 58.5   | 1.42  | 2.68 | <0,00001 |
| ELAVL2    | 66.5    | 6.4    | 33.7    | 1.2    | 30.9    | 2.5    | 32.3    | 2.4    | -1.04 | 0.49 | <0,00001 |
| ELFN2     | 100.8   | 6.8    | 306.8   | 52.9   | 875.2   | 64.8   | 591.0   | 308.8  | 2.36  | 5.13 | <0,00001 |
| ELL2      | 5150.6  | 341.1  | 17014.3 | 491.6  | 18032.1 | 2977.0 | 17523.2 | 2048.8 | 1.76  | 3.38 | <0,00001 |
| ELP5      | 713.9   | 14.6   | 986.4   | 33.3   | 2010.8  | 151.1  | 1498.6  | 556.8  | 1.03  | 2.04 | 0.00032  |
| EMILIN2   | 806.9   | 74.4   | 83.6    | 3.2    | 144.4   | 16.2   | 114.0   | 34.3   | -2.77 | 0.15 | <0,00001 |
| EMP2      | 18747.5 | 1763.8 | 3436.8  | 588.1  | 145.2   | 6.3    | 1791.0  | 1801.1 | -2.42 | 0.19 | 0.00049  |
| EMP3      | 1616.2  | 80.1   | 5609.5  | 257.3  | 4607.6  | 386.2  | 5108.5  | 615.8  | 1.65  | 3.14 | <0,00001 |

|           |         |        |         |        |         |        |         |         |       |       |          |
|-----------|---------|--------|---------|--------|---------|--------|---------|---------|-------|-------|----------|
| EMX2      | 33.7    | 1.3    | 104.7   | 3.9    | 57.6    | 3.3    | 81.1    | 25.4    | 1.23  | 2.34  | 0.00001  |
| EMX2OS    | 32.3    | 0.8    | 100.0   | 3.0    | 61.2    | 3.1    | 80.6    | 20.9    | 1.30  | 2.46  | <0,00001 |
| ENG       | 121.0   | 5.0    | 49.1    | 1.1    | 54.1    | 4.0    | 51.6    | 3.8     | -1.23 | 0.43  | <0,00001 |
| ENO3      | 1445.4  | 88.6   | 242.2   | 7.9    | 495.8   | 68.1   | 369.0   | 142.8   | -1.90 | 0.27  | <0,00001 |
| ENPP1     | 87.5    | 2.9    | 292.4   | 30.6   | 194.1   | 11.1   | 243.2   | 56.7    | 1.45  | 2.74  | <0,00001 |
| ENPP5     | 554.1   | 20.5   | 63.5    | 4.7    | 78.4    | 1.8    | 71.0    | 8.6     | -2.97 | 0.13  | <0,00001 |
| EPB41L2   | 320.5   | 13.8   | 555.9   | 33.3   | 746.9   | 52.2   | 651.4   | 109.9   | 1.01  | 2.02  | <0,00001 |
| EPB41L3   | 1692.6  | 88.6   | 992.6   | 65.2   | 458.7   | 35.3   | 725.6   | 289.5   | -1.17 | 0.45  | 0.00015  |
| EPCAM     | 510.7   | 21.0   | 39.7    | 0.7    | 50.9    | 0.8    | 45.3    | 6.0     | -3.49 | 0.09  | <0,00001 |
| EPHX1     | 381.8   | 33.1   | 451.0   | 57.1   | 1311.0  | 122.7  | 881.0   | 468.2   | 1.11  | 2.16  | 0.00649  |
| ERCC6     | 756.6   | 35.3   | 1247.8  | 99.3   | 2465.8  | 240.6  | 1856.8  | 673.0   | 1.25  | 2.38  | 0.00001  |
| ERICH5    | 14754.7 | 523.1  | 1019.5  | 14.1   | 416.5   | 15.7   | 718.0   | 322.6   | -4.13 | 0.06  | <0,00001 |
| ERVMER34- | 117.9   | 8.4    | 36.4    | 1.5    | 36.7    | 1.2    | 36.6    | 1.3     | -1.68 | 0.31  | <0,00001 |
| ESPNL     | 170.1   | 10.0   | 439.8   | 59.9   | 2272.6  | 57.9   | 1356.2  | 981.1   | 2.55  | 5.87  | <0,00001 |
| ESRP2     | 1168.2  | 57.6   | 129.0   | 12.1   | 88.4    | 3.3    | 108.7   | 23.2    | -3.39 | 0.10  | <0,00001 |
| ETNPPL    | 80.7    | 2.9    | 35.3    | 2.1    | 33.1    | 0.6    | 34.2    | 1.8     | -1.24 | 0.42  | <0,00001 |
| EVA1A     | 4781.7  | 181.5  | 1370.6  | 81.8   | 1897.0  | 65.3   | 1633.8  | 289.6   | -1.54 | 0.34  | <0,00001 |
| EYA4      | 80.7    | 19.9   | 32.3    | 1.3    | 30.9    | 3.4    | 31.6    | 2.5     | -1.35 | 0.39  | <0,00001 |
| F10       | 685.1   | 47.5   | 37.4    | 2.5    | 36.5    | 2.0    | 37.0    | 2.1     | -4.20 | 0.05  | <0,00001 |
| F2RL1     | 188.9   | 12.5   | 107.5   | 4.5    | 71.6    | 1.1    | 89.6    | 19.4    | -1.06 | 0.48  | <0,00001 |
| F3        | 284.6   | 19.2   | 2072.2  | 74.5   | 1364.5  | 75.4   | 1718.4  | 384.6   | 2.55  | 5.87  | <0,00001 |
| FAM13A-AS | 128.1   | 12.0   | 42.1    | 2.2    | 68.0    | 2.7    | 55.1    | 14.0    | -1.20 | 0.44  | <0,00001 |
| FAM150B   | 53.4    | 4.3    | 1818.2  | 252.5  | 37.4    | 2.0    | 927.8   | 966.2   | 2.37  | 5.16  | 0.00122  |
| FAM168A   | 267.0   | 7.2    | 447.2   | 34.4   | 827.3   | 38.6   | 637.3   | 206.0   | 1.22  | 2.33  | <0,00001 |
| FAM174B   | 4212.0  | 115.0  | 1065.2  | 130.3  | 778.3   | 33.6   | 921.8   | 176.9   | -2.17 | 0.22  | <0,00001 |
| FAM184A   | 817.9   | 24.2   | 200.7   | 9.1    | 312.4   | 5.1    | 256.5   | 60.1    | -1.65 | 0.32  | <0,00001 |
| FAM19A5   | 744.1   | 27.9   | 73.9    | 10.7   | 34.9    | 1.6    | 54.4    | 22.0    | -3.63 | 0.08  | <0,00001 |
| FAM201A   | 165.7   | 13.1   | 68.4    | 3.6    | 86.4    | 1.7    | 77.4    | 10.0    | -1.10 | 0.47  | <0,00001 |
| FAM213A   | 14507.2 | 490.0  | 4307.5  | 102.7  | 9713.2  | 465.0  | 7010.4  | 2906.3  | -1.00 | 0.50  | 0.00170  |
| FAM46B    | 818.0   | 36.4   | 60.7    | 4.4    | 101.5   | 5.3    | 81.1    | 22.3    | -3.28 | 0.10  | <0,00001 |
| FAM49A    | 260.9   | 17.1   | 42.4    | 4.7    | 37.9    | 1.9    | 40.2    | 4.1     | -2.70 | 0.15  | <0,00001 |
| FAM71F1   | 283.7   | 23.3   | 78.9    | 9.9    | 159.0   | 15.9   | 118.9   | 44.5    | -1.21 | 0.43  | 0.00002  |
| FANCL     | 4459.3  | 284.7  | 1485.9  | 92.3   | 1782.2  | 108.4  | 1634.1  | 183.8   | -1.44 | 0.37  | <0,00001 |
| FANK1     | 725.4   | 51.0   | 1922.8  | 110.6  | 1736.4  | 102.6  | 1829.6  | 140.3   | 1.33  | 2.52  | <0,00001 |
| FAP       | 7619.7  | 703.8  | 27142.7 | 3222.9 | 53631.1 | 3970.0 | 40386.9 | 14549.0 | 2.32  | 4.98  | <0,00001 |
| FBLN2     | 9922.6  | 306.2  | 356.6   | 15.1   | 552.8   | 8.7    | 454.7   | 105.5   | -4.38 | 0.05  | <0,00001 |
| FBXL16    | 751.6   | 35.2   | 3915.8  | 184.8  | 2947.8  | 384.0  | 3431.8  | 587.9   | 2.17  | 4.50  | <0,00001 |
| FBXO2     | 26676.5 | 1452.9 | 15777.1 | 2124.4 | 4056.9  | 242.2  | 9917.0  | 6419.2  | -1.27 | 0.41  | 0.00826  |
| FBXO5     | 51.2    | 2.4    | 181.2   | 6.7    | 175.5   | 10.6   | 178.3   | 8.7     | 1.80  | 3.48  | <0,00001 |
| FCHO1     | 209.7   | 5.1    | 135.0   | 9.4    | 49.3    | 2.8    | 92.2    | 46.3    | -1.11 | 0.46  | 0.00436  |
| FDCSP     | 82.5    | 6.8    | 19890.3 | 2289.5 | 1530.0  | 161.2  | 10710.1 | 9928.3  | 4.78  | 27.51 | <0,00001 |
| FES       | 166.8   | 19.3   | 38.0    | 2.6    | 34.6    | 2.2    | 36.3    | 2.9     | -2.19 | 0.22  | <0,00001 |
| FHOD3     | 4506.6  | 218.1  | 2751.8  | 173.1  | 1316.2  | 57.9   | 2034.0  | 776.6   | -1.10 | 0.47  | 0.00020  |

|           |         |        |         |        |         |       |         |        |       |       |          |
|-----------|---------|--------|---------|--------|---------|-------|---------|--------|-------|-------|----------|
| FIGF      | 31.1    | 1.6    | 33.8    | 1.6    | 186.4   | 32.9  | 110.1   | 84.4   | 1.54  | 2.91  | 0.00653  |
| FILIP1L   | 4232.9  | 298.1  | 10534.9 | 773.6  | 10657.9 | 584.5 | 10596.4 | 638.1  | 1.32  | 2.50  | <0,00001 |
| FJX1      | 1480.9  | 84.5   | 3787.6  | 156.8  | 3510.3  | 117.8 | 3649.0  | 196.1  | 1.30  | 2.46  | <0,00001 |
| FLJ26850  | 55.3    | 1.9    | 96.8    | 3.0    | 171.2   | 7.0   | 134.0   | 40.1   | 1.24  | 2.37  | <0,00001 |
| FLJ31715  | 361.0   | 8.6    | 116.5   | 10.2   | 136.0   | 3.2   | 126.2   | 12.6   | -1.51 | 0.35  | <0,00001 |
| FLRT3     | 2036.9  | 246.4  | 1023.6  | 155.4  | 383.6   | 70.7  | 703.6   | 359.9  | -1.43 | 0.37  | 0.00021  |
| FLVCR1    | 829.9   | 32.9   | 396.4   | 40.9   | 403.3   | 28.1  | 399.8   | 32.7   | -1.05 | 0.48  | <0,00001 |
| FLVCR1-AS | 57.5    | 7.2    | 359.7   | 10.5   | 263.0   | 20.5  | 311.4   | 53.9   | 2.41  | 5.31  | <0,00001 |
| FMN1      | 105.6   | 5.0    | 42.9    | 1.4    | 41.5    | 2.4   | 42.2    | 2.0    | -1.33 | 0.40  | <0,00001 |
| FMNL2     | 2104.4  | 62.1   | 774.2   | 4.9    | 977.9   | 34.4  | 876.1   | 111.3  | -1.26 | 0.42  | <0,00001 |
| FOLR1     | 3556.9  | 210.4  | 375.1   | 25.5   | 321.8   | 12.7  | 348.4   | 34.1   | -3.34 | 0.10  | <0,00001 |
| FOXF2     | 1767.9  | 35.8   | 2935.0  | 156.2  | 7550.0  | 147.3 | 5242.5  | 2470.8 | 1.47  | 2.78  | 0.00003  |
| FOXL1     | 367.2   | 39.9   | 180.4   | 4.0    | 175.4   | 18.2  | 177.9   | 12.5   | -1.04 | 0.49  | <0,00001 |
| FPR1      | 46.2    | 3.7    | 218.7   | 13.3   | 52.6    | 1.6   | 135.7   | 89.2   | 1.38  | 2.60  | 0.00664  |
| FRMD5     | 326.6   | 10.6   | 878.0   | 36.0   | 955.4   | 101.0 | 916.7   | 81.5   | 1.49  | 2.80  | <0,00001 |
| FRMPD3    | 110.9   | 7.3    | 168.7   | 7.0    | 287.5   | 26.1  | 228.1   | 66.0   | 1.01  | 2.02  | 0.00002  |
| FRY       | 106.1   | 8.8    | 182.6   | 23.7   | 248.2   | 18.7  | 215.4   | 40.3   | 1.01  | 2.01  | <0,00001 |
| FSD1      | 1676.5  | 27.1   | 773.1   | 25.1   | 822.3   | 36.9  | 797.7   | 39.3   | -1.07 | 0.48  | <0,00001 |
| FUCA1     | 3936.7  | 89.3   | 5757.5  | 196.8  | 11453.8 | 299.3 | 8605.6  | 3053.8 | 1.09  | 2.13  | 0.00006  |
| FUT8      | 905.3   | 27.0   | 3196.0  | 332.5  | 1697.6  | 57.9  | 2446.8  | 830.8  | 1.39  | 2.62  | <0,00001 |
| FXVD6     | 134.2   | 6.8    | 55.6    | 5.7    | 50.1    | 4.8   | 52.8    | 5.7    | -1.34 | 0.39  | <0,00001 |
| FZD7      | 319.5   | 22.4   | 1889.8  | 151.5  | 361.8   | 14.9  | 1125.8  | 822.8  | 1.55  | 2.94  | 0.00394  |
| G0S2      | 31.4    | 1.5    | 88.4    | 8.9    | 59.3    | 5.0   | 73.9    | 17.0   | 1.21  | 2.32  | <0,00001 |
| GABRA5    | 124.8   | 7.1    | 37.0    | 0.7    | 31.8    | 2.5   | 34.4    | 3.3    | -1.86 | 0.28  | <0,00001 |
| GADD45A   | 26492.7 | 876.3  | 15088.6 | 359.1  | 6214.8  | 114.9 | 10651.7 | 4749.7 | -1.24 | 0.42  | 0.00027  |
| GAL       | 162.2   | 6.1    | 605.1   | 85.6   | 842.5   | 104.6 | 723.8   | 154.7  | 2.13  | 4.37  | <0,00001 |
| GAL3ST1   | 52.6    | 3.1    | 229.0   | 8.5    | 91.1    | 6.6   | 160.0   | 74.1   | 1.52  | 2.86  | 0.00004  |
| GAL3ST3   | 666.0   | 63.7   | 90.0    | 11.1   | 72.4    | 3.5   | 81.2    | 12.1   | -3.02 | 0.12  | <0,00001 |
| GALNS     | 788.3   | 47.9   | 1727.8  | 67.4   | 1502.8  | 48.9  | 1615.3  | 132.1  | 1.03  | 2.05  | <0,00001 |
| GALNT16   | 60.9    | 1.8    | 3394.3  | 583.5  | 7139.6  | 354.9 | 5267.0  | 2051.3 | 6.13  | 69.93 | <0,00001 |
| GALNT5    | 369.2   | 15.0   | 196.6   | 38.2   | 117.8   | 8.1   | 157.2   | 49.3   | -1.20 | 0.43  | <0,00001 |
| GALNT6    | 178.1   | 24.1   | 35.7    | 1.9    | 31.0    | 1.9   | 33.4    | 3.0    | -2.41 | 0.19  | <0,00001 |
| GAS1      | 268.6   | 38.1   | 52.7    | 2.6    | 88.8    | 1.6   | 70.8    | 19.4   | -1.89 | 0.27  | <0,00001 |
| GAS6      | 1225.1  | 60.1   | 21477.6 | 1727.5 | 6630.7  | 735.1 | 14054.2 | 8030.6 | 3.21  | 9.23  | <0,00001 |
| GATA2-AS1 | 192.3   | 15.0   | 74.7    | 7.6    | 32.7    | 3.2   | 53.7    | 23.1   | -1.76 | 0.30  | <0,00001 |
| GATM      | 455.6   | 35.1   | 144.3   | 21.0   | 56.3    | 1.2   | 100.3   | 49.0   | -2.05 | 0.24  | <0,00001 |
| GBF1      | 4712.2  | 413.6  | 8007.6  | 361.7  | 13279.2 | 836.5 | 10643.4 | 2880.2 | 1.15  | 2.22  | <0,00001 |
| GBP2      | 176.9   | 4.6    | 1269.2  | 130.4  | 833.1   | 30.0  | 1051.2  | 249.0  | 2.53  | 5.77  | <0,00001 |
| GCNT1     | 95.6    | 5.9    | 213.6   | 5.8    | 618.6   | 43.5  | 416.1   | 218.4  | 1.96  | 3.90  | <0,00001 |
| GDF15     | 73068.8 | 2793.9 | 182.0   | 8.6    | 361.2   | 23.1  | 271.6   | 97.2   | -7.81 | 0.00  | <0,00001 |
| GEM       | 6257.8  | 261.6  | 144.0   | 14.6   | 1508.2  | 124.6 | 826.1   | 733.8  | -2.31 | 0.20  | 0.00021  |
| GGACT     | 180.9   | 9.9    | 826.9   | 19.1   | 887.7   | 24.5  | 857.3   | 38.3   | 2.24  | 4.73  | <0,00001 |
| GGT8P     | 141.4   | 10.6   | 42.8    | 1.3    | 58.5    | 2.4   | 50.7    | 8.6    | -1.48 | 0.36  | <0,00001 |



|           |         |       |         |        |         |       |         |        |       |       |          |
|-----------|---------|-------|---------|--------|---------|-------|---------|--------|-------|-------|----------|
| GGTLC1    | 408.5   | 24.5  | 155.5   | 10.4   | 158.4   | 15.1  | 157.0   | 12.1   | -1.38 | 0.38  | <0,00001 |
| GLI1      | 75.6    | 3.7   | 76.0    | 10.0   | 662.2   | 32.0  | 369.1   | 314.1  | 1.80  | 3.49  | 0.00367  |
| GLIS1     | 528.7   | 72.0  | 550.8   | 56.7   | 2725.3  | 220.4 | 1638.0  | 1171.9 | 1.40  | 2.65  | 0.00844  |
| GLS2      | 168.3   | 3.9   | 62.8    | 1.0    | 79.8    | 2.3   | 71.3    | 9.2    | -1.24 | 0.42  | <0,00001 |
| GMPR      | 518.5   | 39.1  | 266.6   | 18.8   | 99.4    | 3.5   | 183.0   | 90.2   | -1.40 | 0.38  | 0.00016  |
| GNG11     | 547.7   | 33.2  | 1020.1  | 43.6   | 3807.1  | 217.7 | 2413.6  | 1496.8 | 1.92  | 3.78  | 0.00002  |
| GNPDA1    | 1148.8  | 60.5  | 526.8   | 50.9   | 542.2   | 29.1  | 534.5   | 39.2   | -1.10 | 0.47  | <0,00001 |
| GPC2      | 1940.8  | 155.6 | 569.2   | 38.9   | 1019.1  | 151.8 | 794.1   | 261.4  | -1.25 | 0.42  | <0,00001 |
| GPC6      | 86.8    | 2.6   | 75.3    | 10.2   | 661.0   | 27.6  | 368.2   | 313.7  | 1.64  | 3.12  | 0.00885  |
| GPM6B     | 84.7    | 7.1   | 33.4    | 1.8    | 32.1    | 1.4   | 32.7    | 1.6    | -1.36 | 0.39  | <0,00001 |
| GPR1      | 30.2    | 1.4   | 120.3   | 4.4    | 36.0    | 1.7   | 78.2    | 45.2   | 1.25  | 2.37  | 0.00744  |
| GPR143    | 5005.2  | 261.9 | 539.7   | 62.2   | 53.3    | 3.5   | 296.5   | 263.2  | -3.24 | 0.11  | <0,00001 |
| GPT       | 156.7   | 5.8   | 405.5   | 27.5   | 377.8   | 32.1  | 391.6   | 31.4   | 1.32  | 2.50  | <0,00001 |
| GPX3      | 1341.1  | 129.2 | 310.9   | 45.2   | 634.4   | 77.2  | 472.6   | 182.6  | -1.45 | 0.37  | <0,00001 |
| GRAMD1A   | 1512.3  | 94.6  | 639.9   | 8.3    | 824.5   | 52.4  | 732.2   | 104.6  | -1.04 | 0.49  | <0,00001 |
| GRAMD3    | 558.5   | 27.7  | 2841.7  | 304.1  | 1144.5  | 42.9  | 1993.1  | 929.2  | 1.73  | 3.32  | <0,00001 |
| GRB14     | 97.5    | 7.5   | 687.7   | 80.8   | 378.8   | 26.7  | 533.3   | 174.2  | 2.38  | 5.19  | <0,00001 |
| GRB7      | 1120.5  | 34.2  | 608.2   | 72.7   | 129.4   | 7.2   | 368.8   | 260.4  | -1.40 | 0.38  | 0.00747  |
| GRHL3     | 104.6   | 5.9   | 45.9    | 2.0    | 49.3    | 2.6   | 47.6    | 2.8    | -1.13 | 0.46  | <0,00001 |
| GRM1      | 863.5   | 46.8  | 128.2   | 43.0   | 416.8   | 14.2  | 272.5   | 157.1  | -1.52 | 0.35  | 0.00059  |
| GRM8      | 229.8   | 7.4   | 41.6    | 1.7    | 65.2    | 1.6   | 53.4    | 12.7   | -2.09 | 0.23  | <0,00001 |
| GSX2      | 383.1   | 3.1   | 112.3   | 32.4   | 75.0    | 4.5   | 93.7    | 29.3   | -1.99 | 0.25  | <0,00001 |
| GTF2E1    | 1831.7  | 43.1  | 902.4   | 45.5   | 790.0   | 27.0  | 846.2   | 69.4   | -1.11 | 0.46  | <0,00001 |
| GUCY1B3   | 82.0    | 8.2   | 54.4    | 2.1    | 1317.6  | 78.0  | 686.0   | 677.2  | 2.04  | 4.11  | 0.00404  |
| GYPC      | 198.6   | 17.5  | 75.7    | 5.5    | 78.6    | 7.6   | 77.1    | 6.3    | -1.36 | 0.39  | <0,00001 |
| H1F0      | 1980.3  | 70.9  | 473.7   | 7.3    | 710.1   | 17.3  | 591.9   | 126.9  | -1.72 | 0.30  | <0,00001 |
| HABP4     | 4720.4  | 252.5 | 1962.2  | 104.2  | 1358.9  | 37.1  | 1660.6  | 330.5  | -1.49 | 0.36  | <0,00001 |
| HAPLN1    | 109.2   | 8.3   | 14611.5 | 1928.6 | 515.0   | 63.2  | 7563.2  | 7640.0 | 3.58  | 11.93 | <0,00001 |
| HAPLN3    | 430.2   | 18.8  | 64.1    | 6.0    | 199.3   | 13.1  | 131.7   | 72.8   | -1.58 | 0.33  | 0.00011  |
| HAS1      | 82.2    | 10.2  | 45.7    | 1.0    | 34.4    | 2.9   | 40.0    | 6.4    | -1.04 | 0.49  | <0,00001 |
| HBQ1      | 399.5   | 17.1  | 191.3   | 6.6    | 174.5   | 10.1  | 182.9   | 11.9   | -1.13 | 0.46  | <0,00001 |
| HCST      | 175.8   | 11.5  | 430.8   | 40.3   | 318.6   | 31.4  | 374.7   | 68.6   | 1.08  | 2.12  | <0,00001 |
| HDDC3     | 407.5   | 19.3  | 941.0   | 44.2   | 805.2   | 35.1  | 873.1   | 81.5   | 1.10  | 2.14  | <0,00001 |
| HEG1      | 71.2    | 2.5   | 204.6   | 9.5    | 107.1   | 6.8   | 155.8   | 52.7   | 1.09  | 2.13  | 0.00010  |
| HERC5     | 112.4   | 8.1   | 49.9    | 3.2    | 51.1    | 1.9   | 50.5    | 2.5    | -1.15 | 0.45  | <0,00001 |
| HES4      | 15253.6 | 909.3 | 2311.3  | 88.7   | 4114.7  | 288.9 | 3213.0  | 984.0  | -2.19 | 0.22  | <0,00001 |
| HHAT      | 471.2   | 6.7   | 734.6   | 20.9   | 1912.1  | 53.3  | 1323.3  | 630.5  | 1.40  | 2.63  | 0.00010  |
| HIST1H1C  | 4252.0  | 211.3 | 17911.1 | 408.1  | 14226.9 | 515.9 | 16069.0 | 2015.8 | 1.91  | 3.75  | <0,00001 |
| HIST1H1D  | 253.1   | 24.1  | 917.3   | 30.1   | 671.9   | 44.1  | 794.6   | 135.8  | 1.63  | 3.10  | <0,00001 |
| HIST1H1E  | 337.4   | 32.8  | 1212.2  | 61.4   | 931.0   | 38.4  | 1071.6  | 157.6  | 1.65  | 3.15  | <0,00001 |
| HIST1H2AA | 47.8    | 2.5   | 120.7   | 1.9    | 91.9    | 6.2   | 106.3   | 15.9   | 1.14  | 2.21  | <0,00001 |
| HIST1H2AC | 39.6    | 3.1   | 99.8    | 7.1    | 63.1    | 1.9   | 81.4    | 20.2   | 1.03  | 2.05  | 0.00001  |
| HIST1H2AD | 1757.3  | 42.3  | 7643.4  | 891.1  | 1902.6  | 46.5  | 4773.0  | 3123.7 | 1.28  | 2.43  | 0.00878  |

|           |         |        |         |       |        |       |         |        |       |      |          |
|-----------|---------|--------|---------|-------|--------|-------|---------|--------|-------|------|----------|
| HIST1H2BB | 297.5   | 31.0   | 1386.8  | 21.2  | 1162.9 | 70.7  | 1274.8  | 129.1  | 2.09  | 4.25 | <0,00001 |
| HIST1H2BC | 176.3   | 19.2   | 916.6   | 47.2  | 702.3  | 69.8  | 809.5   | 127.1  | 2.18  | 4.52 | <0,00001 |
| HIST1H2BF | 1018.7  | 88.9   | 4755.9  | 69.4  | 4123.5 | 277.8 | 4439.7  | 386.5  | 2.12  | 4.33 | <0,00001 |
| HIST1H2BG | 197.8   | 11.7   | 941.7   | 26.5  | 818.4  | 38.9  | 880.1   | 72.8   | 2.15  | 4.43 | <0,00001 |
| HIST1H2BH | 985.7   | 36.6   | 5159.4  | 125.4 | 4301.6 | 113.8 | 4730.5  | 471.8  | 2.25  | 4.77 | <0,00001 |
| HIST1H2BI | 549.1   | 31.5   | 2383.4  | 94.0  | 2365.5 | 99.6  | 2374.5  | 90.2   | 2.11  | 4.32 | <0,00001 |
| HIST1H2BK | 963.7   | 77.2   | 5939.9  | 211.8 | 5339.6 | 190.1 | 5639.7  | 371.0  | 2.54  | 5.83 | <0,00001 |
| HIST1H2BL | 1799.6  | 69.2   | 8627.6  | 328.5 | 6895.3 | 251.9 | 7761.5  | 964.8  | 2.10  | 4.28 | <0,00001 |
| HIST1H2BM | 708.1   | 56.4   | 3303.9  | 92.3  | 2986.4 | 91.3  | 3145.2  | 189.8  | 2.15  | 4.43 | <0,00001 |
| HIST1H2BO | 816.7   | 52.6   | 4210.3  | 137.6 | 3493.0 | 134.0 | 3851.6  | 403.5  | 2.23  | 4.68 | <0,00001 |
| HIST1H4H  | 141.4   | 9.0    | 408.8   | 29.7  | 306.9  | 11.1  | 357.8   | 58.3   | 1.33  | 2.51 | <0,00001 |
| HIST2H2BD | 305.6   | 21.7   | 1321.2  | 46.1  | 1088.0 | 30.0  | 1204.6  | 129.8  | 1.97  | 3.92 | <0,00001 |
| HIVEP2    | 917.8   | 38.1   | 3846.2  | 241.7 | 1261.0 | 78.6  | 2553.6  | 1391.9 | 1.36  | 2.57 | 0.00094  |
| HLA-DPB1  | 79.5    | 5.1    | 37.9    | 2.8   | 34.7   | 0.8   | 36.3    | 2.5    | -1.12 | 0.46 | <0,00001 |
| HLCS      | 1079.9  | 99.9   | 2295.5  | 79.1  | 2311.3 | 102.7 | 2303.4  | 85.2   | 1.09  | 2.13 | <0,00001 |
| HLX       | 37.1    | 2.0    | 94.6    | 4.3   | 112.4  | 5.9   | 103.5   | 10.7   | 1.48  | 2.78 | <0,00001 |
| HMGB3     | 3795.7  | 113.0  | 2038.7  | 135.5 | 1583.2 | 80.7  | 1810.9  | 264.4  | -1.06 | 0.48 | <0,00001 |
| HMGB3P1   | 1109.8  | 46.0   | 574.3   | 60.5  | 350.8  | 2.5   | 462.5   | 125.8  | -1.24 | 0.42 | <0,00001 |
| HOMER2    | 1703.4  | 113.9  | 545.0   | 33.8  | 813.0  | 27.3  | 679.0   | 146.0  | -1.31 | 0.40 | <0,00001 |
| HOXB9     | 47.6    | 4.7    | 1914.1  | 61.6  | 39.2   | 5.1   | 976.6   | 1003.0 | 2.48  | 5.57 | 0.00069  |
| HPDL      | 432.6   | 46.2   | 131.0   | 10.7  | 95.4   | 3.2   | 113.2   | 20.4   | -1.92 | 0.26 | <0,00001 |
| HPS5      | 600.3   | 29.8   | 1359.6  | 97.9  | 1072.6 | 46.4  | 1216.1  | 169.0  | 1.01  | 2.02 | <0,00001 |
| HSD17B2   | 26826.6 | 1644.6 | 59.1    | 3.9   | 1119.5 | 123.1 | 589.3   | 572.5  | -4.08 | 0.06 | <0,00001 |
| HSPB2     | 2247.7  | 37.8   | 109.3   | 12.0  | 119.1  | 9.2   | 114.2   | 11.2   | -4.30 | 0.05 | <0,00001 |
| HSPB3     | 8217.4  | 411.3  | 71.6    | 12.5  | 609.7  | 66.0  | 340.7   | 291.0  | -3.74 | 0.07 | <0,00001 |
| HSPB7     | 704.5   | 19.7   | 113.2   | 19.6  | 64.3   | 3.9   | 88.7    | 29.2   | -2.92 | 0.13 | <0,00001 |
| HSPH1     | 25300.5 | 1538.7 | 15438.6 | 909.2 | 8432.5 | 385.5 | 11935.5 | 3800.3 | -1.05 | 0.48 | 0.00003  |
| HTATSF1P2 | 35.2    | 2.6    | 701.6   | 30.6  | 36.2   | 0.3   | 368.9   | 356.2  | 2.31  | 4.96 | 0.00079  |
| HYLS1     | 553.7   | 15.6   | 252.0   | 8.4   | 224.8  | 20.8  | 238.4   | 20.7   | -1.21 | 0.43 | <0,00001 |
| ICAM3     | 446.0   | 12.3   | 1350.1  | 64.2  | 1042.1 | 57.0  | 1196.1  | 174.0  | 1.41  | 2.67 | <0,00001 |
| ICE1      | 1542.4  | 72.2   | 713.6   | 18.8  | 753.7  | 16.4  | 733.7   | 27.0   | -1.07 | 0.48 | <0,00001 |
| IFI30     | 4464.6  | 333.1  | 555.9   | 22.4  | 1958.6 | 45.3  | 1257.3  | 750.5  | -1.66 | 0.32 | 0.00015  |
| IFI44     | 107.3   | 14.5   | 132.4   | 6.1   | 854.3  | 32.9  | 493.4   | 386.5  | 1.82  | 3.53 | 0.00144  |
| IFNE      | 58.8    | 4.8    | 518.3   | 74.2  | 193.9  | 10.3  | 356.1   | 180.2  | 2.43  | 5.38 | <0,00001 |
| IFT46     | 373.8   | 34.2   | 1501.9  | 28.3  | 1410.4 | 46.0  | 1456.2  | 60.3   | 1.96  | 3.89 | <0,00001 |
| IGFALS    | 421.0   | 64.9   | 95.7    | 8.0   | 71.3   | 1.3   | 83.5    | 14.1   | -2.31 | 0.20 | <0,00001 |
| IGFBP2    | 2834.9  | 325.2  | 1592.7  | 180.3 | 945.3  | 284.7 | 1269.0  | 410.4  | -1.12 | 0.46 | 0.00007  |
| IGFBP4    | 362.5   | 39.5   | 41.5    | 0.5   | 36.0   | 5.0   | 38.7    | 4.4    | -3.22 | 0.11 | <0,00001 |
| IGFBP6    | 202.2   | 12.3   | 1432.1  | 222.4 | 607.2  | 37.5  | 1019.6  | 465.0  | 2.21  | 4.61 | <0,00001 |
| IGFLR1    | 107.9   | 9.3    | 441.6   | 14.3  | 288.9  | 22.0  | 365.2   | 83.4   | 1.73  | 3.32 | <0,00001 |
| IGIP      | 250.2   | 17.2   | 611.7   | 34.8  | 733.2  | 31.5  | 672.5   | 71.8   | 1.42  | 2.68 | <0,00001 |
| IGSF21    | 112.6   | 7.2    | 37.3    | 2.4   | 63.4   | 5.2   | 50.4    | 14.4   | -1.15 | 0.45 | <0,00001 |
| IL12A     | 59.3    | 3.5    | 230.9   | 31.3  | 483.6  | 35.3  | 357.3   | 138.5  | 2.48  | 5.58 | <0,00001 |

|           |         |        |         |        |         |        |         |         |       |       |          |
|-----------|---------|--------|---------|--------|---------|--------|---------|---------|-------|-------|----------|
| IL17B     | 82.2    | 4.5    | 34.7    | 1.7    | 40.2    | 2.2    | 37.4    | 3.5     | -1.13 | 0.46  | <0,00001 |
| IL20RB    | 61.2    | 5.2    | 142.7   | 3.6    | 156.8   | 19.9   | 149.8   | 15.3    | 1.29  | 2.45  | <0,00001 |
| IL27      | 193.9   | 19.6   | 1445.5  | 156.4  | 831.8   | 109.3  | 1138.7  | 351.0   | 2.48  | 5.59  | <0,00001 |
| IL27RA    | 135.9   | 2.1    | 341.1   | 20.4   | 475.3   | 25.9   | 408.2   | 74.9    | 1.57  | 2.96  | <0,00001 |
| IL32      | 501.9   | 42.9   | 174.6   | 19.4   | 51.9    | 2.8    | 113.3   | 66.8    | -1.96 | 0.26  | <0,00001 |
| IL33      | 1108.2  | 52.1   | 184.9   | 42.6   | 363.8   | 19.9   | 274.3   | 100.4   | -1.94 | 0.26  | <0,00001 |
| IL6       | 76.7    | 4.5    | 736.0   | 74.2   | 204.9   | 12.9   | 470.4   | 288.1   | 2.35  | 5.10  | <0,00001 |
| IL6R      | 35.5    | 2.2    | 83.9    | 11.3   | 62.8    | 6.1    | 73.3    | 14.1    | 1.04  | 2.06  | <0,00001 |
| IL7R      | 74.6    | 5.9    | 147.5   | 41.7   | 292.2   | 36.1   | 219.8   | 85.4    | 1.49  | 2.81  | <0,00001 |
| INHBA     | 7210.6  | 333.6  | 52161.8 | 2327.5 | 19472.8 | 1104.2 | 35817.3 | 17554.2 | 2.16  | 4.48  | <0,00001 |
| INHBB     | 5887.2  | 276.5  | 89.3    | 2.5    | 48.4    | 3.7    | 68.9    | 22.0    | -6.27 | 0.01  | <0,00001 |
| INO80C    | 2451.6  | 112.9  | 736.5   | 23.6   | 650.0   | 18.0   | 693.3   | 50.1    | -1.82 | 0.28  | <0,00001 |
| INPP5D    | 6186.4  | 239.7  | 361.4   | 26.2   | 195.5   | 5.6    | 278.4   | 90.4    | -4.35 | 0.05  | <0,00001 |
| IP6K3     | 1041.2  | 33.3   | 38.1    | 3.8    | 43.6    | 2.9    | 40.8    | 4.3     | -4.67 | 0.04  | <0,00001 |
| IPP       | 343.6   | 19.8   | 1141.5  | 40.0   | 746.7   | 45.6   | 944.1   | 214.7   | 1.44  | 2.71  | <0,00001 |
| IQCB1     | 1403.5  | 63.7   | 689.2   | 32.0   | 570.4   | 62.1   | 629.8   | 78.3    | -1.15 | 0.45  | <0,00001 |
| IQCD      | 1369.8  | 38.9   | 552.1   | 57.5   | 385.3   | 11.8   | 468.7   | 97.1    | -1.53 | 0.35  | <0,00001 |
| IQGAP2    | 245.5   | 29.1   | 39.5    | 3.2    | 38.0    | 3.3    | 38.7    | 3.1     | -2.65 | 0.16  | <0,00001 |
| IRF6      | 216.7   | 11.4   | 35.5    | 2.6    | 37.1    | 1.3    | 36.3    | 2.1     | -2.58 | 0.17  | <0,00001 |
| ISLR      | 80.8    | 6.0    | 294.2   | 49.0   | 924.3   | 82.4   | 609.3   | 342.6   | 2.66  | 6.32  | <0,00001 |
| ISYNA1    | 7431.2  | 419.5  | 1028.5  | 60.1   | 1860.0  | 118.6  | 1444.2  | 452.9   | -2.30 | 0.20  | <0,00001 |
| ITGA4     | 47.8    | 5.6    | 118.3   | 21.6   | 419.3   | 14.8   | 268.8   | 161.8   | 2.24  | 4.72  | <0,00001 |
| ITGA6     | 476.2   | 28.3   | 3945.4  | 67.4   | 730.6   | 60.3   | 2338.0  | 1719.4  | 1.95  | 3.87  | 0.00025  |
| ITGA7     | 29820.7 | 2166.3 | 73760.2 | 3579.6 | 52832.7 | 1141.9 | 63296.5 | 11453.4 | 1.08  | 2.11  | <0,00001 |
| ITGB5     | 11848.5 | 748.1  | 32062.6 | 2509.0 | 29601.7 | 1905.8 | 30832.1 | 2446.4  | 1.38  | 2.59  | <0,00001 |
| ITLN1     | 174.7   | 1.7    | 41.4    | 3.3    | 39.1    | 3.1    | 40.2    | 3.2     | -2.12 | 0.23  | <0,00001 |
| ITLN2     | 77.8    | 7.5    | 38.0    | 1.0    | 38.2    | 2.0    | 38.1    | 1.5     | -1.03 | 0.49  | <0,00001 |
| ITPKA     | 52.2    | 4.0    | 176.7   | 3.7    | 99.0    | 2.2    | 137.8   | 41.6    | 1.37  | 2.59  | <0,00001 |
| JAG1      | 5439.5  | 301.9  | 548.1   | 70.9   | 2927.8  | 158.8  | 1738.0  | 1277.1  | -1.42 | 0.37  | 0.00935  |
| JAKMIP1   | 190.6   | 18.1   | 49.6    | 6.7    | 97.5    | 11.3   | 73.6    | 27.0    | -1.33 | 0.40  | <0,00001 |
| JAKMIP2   | 68.4    | 2.4    | 32.3    | 2.3    | 30.3    | 1.9    | 31.3    | 2.2     | -1.13 | 0.46  | <0,00001 |
| KANK4     | 35.5    | 1.3    | 60.5    | 4.9    | 963.9   | 82.8   | 512.2   | 485.9   | 2.70  | 6.51  | 0.00005  |
| KANSL1-AS | 1330.1  | 64.3   | 541.5   | 35.9   | 174.0   | 7.9    | 357.7   | 197.9   | -1.74 | 0.30  | 0.00002  |
| KAZALD1   | 157.2   | 5.8    | 44.1    | 4.8    | 107.6   | 9.9    | 75.9    | 34.7    | -1.00 | 0.50  | 0.00475  |
| KCNC3     | 343.9   | 18.0   | 136.4   | 6.3    | 194.6   | 10.9   | 165.5   | 32.2    | -1.04 | 0.48  | <0,00001 |
| KCNJ3     | 209.3   | 12.3   | 33.6    | 2.1    | 34.9    | 2.8    | 34.2    | 2.4     | -2.61 | 0.16  | <0,00001 |
| KCNN4     | 127.9   | 5.3    | 2726.3  | 188.3  | 2916.6  | 195.6  | 2821.5  | 204.8   | 4.45  | 21.90 | <0,00001 |
| KCNQ1     | 151.9   | 12.2   | 92.3    | 9.6    | 38.5    | 2.3    | 65.4    | 29.5    | -1.15 | 0.45  | 0.00092  |
| KCTD12    | 60.7    | 3.6    | 87.8    | 4.7    | 369.8   | 35.0   | 228.8   | 152.5   | 1.68  | 3.20  | 0.00068  |
| KCTD4     | 41.6    | 3.9    | 2026.4  | 176.1  | 869.7   | 3.9    | 1448.1  | 628.9   | 4.84  | 28.58 | <0,00001 |
| KDM5D     | 997.2   | 52.0   | 71.2    | 4.5    | 60.0    | 7.3    | 65.6    | 8.2     | -3.92 | 0.07  | <0,00001 |
| KHDRBS2   | 166.5   | 11.4   | 29.9    | 2.1    | 37.1    | 1.5    | 33.5    | 4.2     | -2.30 | 0.20  | <0,00001 |
| KHDRBS3   | 784.7   | 22.0   | 919.2   | 82.4   | 3416.6  | 119.7  | 2167.9  | 1338.3  | 1.32  | 2.49  | 0.00462  |

|          |          |        |         |        |         |        |         |         |       |       |          |
|----------|----------|--------|---------|--------|---------|--------|---------|---------|-------|-------|----------|
| KHK      | 240.0    | 22.8   | 139.5   | 7.8    | 68.4    | 5.5    | 103.9   | 38.5    | -1.16 | 0.45  | 0.00006  |
| KIAA1147 | 653.4    | 29.7   | 336.4   | 18.9   | 274.1   | 12.3   | 305.3   | 36.5    | -1.09 | 0.47  | <0,00001 |
| KIAA1324 | 208.2    | 8.0    | 75.8    | 7.7    | 94.7    | 7.7    | 85.2    | 12.4    | -1.29 | 0.41  | <0,00001 |
| KIAA1462 | 52.2     | 1.3    | 99.9    | 2.6    | 129.6   | 10.1   | 114.7   | 17.2    | 1.12  | 2.18  | <0,00001 |
| KIAA1652 | 139.0    | 41.0   | 423.0   | 78.7   | 217.9   | 69.3   | 320.4   | 129.3   | 1.14  | 2.21  | 0.00114  |
| KIAA1683 | 189.1    | 22.0   | 809.8   | 45.2   | 483.7   | 34.4   | 646.8   | 178.2   | 1.73  | 3.33  | <0,00001 |
| KIF18A   | 163.9    | 7.2    | 64.1    | 1.0    | 78.6    | 5.2    | 71.4    | 8.5     | -1.20 | 0.44  | <0,00001 |
| KIF26A   | 179.5    | 10.4   | 46.3    | 2.5    | 55.4    | 16.6   | 50.9    | 12.0    | -1.81 | 0.29  | <0,00001 |
| KIF5C    | 3204.3   | 202.9  | 348.4   | 14.5   | 172.3   | 22.2   | 260.3   | 95.8    | -3.49 | 0.09  | <0,00001 |
| KIFAP3   | 31620.8  | 1785.4 | 4695.4  | 219.0  | 11498.4 | 526.8  | 8096.9  | 3655.4  | -1.86 | 0.28  | <0,00001 |
| KIT      | 188.8    | 8.7    | 33.7    | 0.5    | 32.9    | 0.6    | 33.3    | 0.7     | -2.49 | 0.18  | <0,00001 |
| KL       | 174.4    | 22.2   | 62.7    | 2.3    | 87.0    | 6.8    | 74.9    | 13.8    | -1.21 | 0.43  | <0,00001 |
| KLF12    | 638.1    | 17.9   | 2150.5  | 235.0  | 1097.6  | 25.5   | 1624.0  | 583.7   | 1.30  | 2.47  | <0,00001 |
| KLHDC8A  | 169.8    | 4.9    | 54.0    | 3.6    | 61.2    | 1.0    | 57.6    | 4.6     | -1.56 | 0.34  | <0,00001 |
| KLHL30   | 89.4     | 6.9    | 39.1    | 0.7    | 38.7    | 3.8    | 38.9    | 2.5     | -1.20 | 0.43  | <0,00001 |
| KLK6     | 295.6    | 22.6   | 42.2    | 3.7    | 38.8    | 3.1    | 40.5    | 3.6     | -2.86 | 0.14  | <0,00001 |
| KLK7     | 95.9     | 7.9    | 33.0    | 1.4    | 31.2    | 2.2    | 32.1    | 2.0     | -1.57 | 0.34  | <0,00001 |
| KREMEN2  | 122.4    | 9.4    | 150.9   | 18.5   | 767.4   | 58.6   | 459.1   | 332.0   | 1.63  | 3.10  | 0.00221  |
| KRT17    | 5797.5   | 419.6  | 142.6   | 9.5    | 335.5   | 36.8   | 239.1   | 106.1   | -4.38 | 0.05  | <0,00001 |
| KRT23    | 340.8    | 18.3   | 201.6   | 38.2   | 77.1    | 3.0    | 139.4   | 71.2    | -1.21 | 0.43  | 0.00135  |
| KRT32    | 92.1     | 2.2    | 259.6   | 26.6   | 263.0   | 9.1    | 261.3   | 18.5    | 1.50  | 2.84  | <0,00001 |
| KRT33B   | 47.2     | 4.2    | 371.9   | 79.9   | 55.9    | 4.2    | 213.9   | 176.8   | 1.79  | 3.45  | 0.00236  |
| KRT34    | 39.6     | 4.4    | 2280.0  | 366.9  | 45.0    | 6.7    | 1162.5  | 1218.6  | 2.43  | 5.39  | 0.00114  |
| KRT81    | 861.1    | 31.2   | 1849.9  | 129.0  | 1779.7  | 64.9   | 1814.8  | 101.7   | 1.07  | 2.11  | <0,00001 |
| KRT83    | 38.6     | 0.7    | 104.9   | 12.3   | 315.2   | 15.0   | 210.1   | 113.1   | 2.25  | 4.77  | <0,00001 |
| KRT86    | 214.5    | 8.7    | 1782.0  | 308.6  | 8972.2  | 467.2  | 5377.1  | 3860.8  | 3.95  | 15.48 | <0,00001 |
| KRTAP1-5 | 29.0     | 1.5    | 299.6   | 67.1   | 285.8   | 41.2   | 292.7   | 52.0    | 3.30  | 9.88  | <0,00001 |
| KRTAP5-8 | 374.9    | 23.7   | 1144.2  | 77.2   | 847.8   | 97.6   | 996.0   | 178.2   | 1.40  | 2.63  | <0,00001 |
| KRTAP7-1 | 76.3     | 2.1    | 36.2    | 0.7    | 32.7    | 2.2    | 34.4    | 2.4     | -1.16 | 0.45  | <0,00001 |
| KRTDAP   | 109.0    | 3.1    | 39.3    | 2.7    | 34.2    | 0.8    | 36.7    | 3.3     | -1.57 | 0.34  | <0,00001 |
| LAMA2    | 65.6     | 5.2    | 414.4   | 37.7   | 161.3   | 36.4   | 287.8   | 139.5   | 1.99  | 3.98  | <0,00001 |
| LAMA5    | 4531.9   | 285.2  | 1917.3  | 132.1  | 2040.1  | 183.7  | 1978.7  | 162.0   | -1.19 | 0.44  | <0,00001 |
| LAMB3    | 288.4    | 25.8   | 1628.5  | 236.9  | 954.1   | 52.1   | 1291.3  | 393.9   | 2.11  | 4.31  | <0,00001 |
| LAMP5    | 36.6     | 4.1    | 41.2    | 3.5    | 527.3   | 64.8   | 284.2   | 263.3   | 2.17  | 4.49  | 0.00097  |
| LARP6    | 15385.3  | 792.4  | 73860.7 | 2572.8 | 17061.1 | 885.9  | 45460.9 | 30412.9 | 1.38  | 2.60  | 0.00608  |
| LDB3     | 696.6    | 21.2   | 61.6    | 2.0    | 353.4   | 17.0   | 207.5   | 156.4   | -1.49 | 0.35  | 0.00729  |
| LDHB     | 124290.8 | 3328.1 | 60918.6 | 2169.8 | 56157.7 | 1083.9 | 58538.2 | 2999.5  | -1.08 | 0.47  | <0,00001 |
| LDHD     | 138.7    | 6.6    | 219.4   | 5.7    | 619.3   | 36.0   | 419.4   | 215.1   | 1.48  | 2.79  | 0.00013  |
| LEFTY1   | 37.0     | 0.7    | 40.0    | 1.8    | 1087.3  | 74.7   | 563.7   | 562.0   | 2.51  | 5.69  | 0.00036  |
| LETM2    | 521.1    | 18.2   | 78.9    | 5.5    | 92.3    | 9.1    | 85.6    | 10.0    | -2.60 | 0.16  | <0,00001 |
| LGALS    | 1214.3   | 98.2   | 423.8   | 6.0    | 707.3   | 59.9   | 565.6   | 156.5   | -1.08 | 0.47  | <0,00001 |
| LGI3     | 649.6    | 21.8   | 135.9   | 10.1   | 172.9   | 14.3   | 154.4   | 22.9    | -2.07 | 0.24  | <0,00001 |
| LHX2     | 24081.8  | 191.3  | 8065.0  | 640.5  | 12712.2 | 404.6  | 10388.6 | 2533.0  | -1.19 | 0.44  | <0,00001 |

|            |         |       |         |        |         |        |         |         |       |       |          |
|------------|---------|-------|---------|--------|---------|--------|---------|---------|-------|-------|----------|
| LIMS1      | 466.7   | 57.9  | 1256.6  | 38.4   | 981.2   | 204.7  | 1118.9  | 200.7   | 1.25  | 2.37  | <0,00001 |
| LINC00312  | 131.0   | 15.0  | 295.2   | 57.0   | 596.9   | 49.2   | 446.1   | 168.7   | 1.69  | 3.23  | <0,00001 |
| LINC00518  | 78.0    | 2.5   | 36.1    | 0.9    | 33.4    | 2.6    | 34.8    | 2.3     | -1.16 | 0.45  | <0,00001 |
| LINC00842  | 31.9    | 4.7   | 117.0   | 8.9    | 67.3    | 65.7   | 92.1    | 50.9    | 1.39  | 2.63  | 0.00271  |
| LINC00886  | 55.7    | 1.8   | 437.3   | 18.5   | 217.1   | 11.0   | 327.2   | 118.5   | 2.46  | 5.52  | <0,00001 |
| LINC01106  | 7494.7  | 479.9 | 2300.8  | 434.2  | 1923.2  | 148.7  | 2112.0  | 361.9   | -1.81 | 0.29  | <0,00001 |
| LINC01133  | 36.6    | 4.5   | 557.1   | 35.3   | 43.4    | 2.0    | 300.3   | 275.5   | 2.23  | 4.69  | 0.00069  |
| LINC01296  | 75.8    | 1.5   | 2322.0  | 78.1   | 1068.4  | 55.3   | 1695.2  | 673.0   | 4.28  | 19.39 | <0,00001 |
| LIPE       | 1518.7  | 138.4 | 1005.4  | 94.6   | 398.5   | 4.7    | 701.9   | 330.3   | -1.05 | 0.48  | 0.00412  |
| LIPH       | 33.3    | 2.6   | 117.0   | 30.3   | 113.9   | 11.2   | 115.4   | 21.2    | 1.79  | 3.45  | <0,00001 |
| LITAF      | 1290.2  | 155.3 | 509.4   | 25.2   | 589.6   | 70.0   | 549.5   | 64.9    | -1.23 | 0.43  | <0,00001 |
| LMCD1      | 16823.3 | 673.9 | 33562.6 | 4499.9 | 83047.6 | 2405.6 | 58305.1 | 26660.9 | 1.69  | 3.23  | <0,00001 |
| LMNB1      | 171.0   | 12.5  | 77.7    | 3.4    | 63.8    | 3.5    | 70.8    | 8.1     | -1.26 | 0.42  | <0,00001 |
| LMO1       | 846.7   | 78.0  | 79.4    | 5.1    | 337.8   | 20.9   | 208.6   | 138.9   | -1.80 | 0.29  | 0.00020  |
| LOC1001312 | 1250.9  | 275.2 | 3045.4  | 102.0  | 2506.3  | 565.9  | 2775.9  | 474.1   | 1.13  | 2.19  | <0,00001 |
| LOC1001315 | 109.3   | 12.8  | 184.8   | 24.4   | 323.0   | 83.5   | 253.9   | 93.3    | 1.17  | 2.26  | 0.00002  |
| LOC1002873 | 233.6   | 31.4  | 144.1   | 9.0    | 70.2    | 0.9    | 107.2   | 39.9    | -1.08 | 0.47  | 0.00024  |
| LOC1010600 | 107.8   | 4.5   | 235.5   | 12.1   | 699.3   | 35.5   | 467.4   | 249.1   | 1.95  | 3.87  | <0,00001 |
| LOC1019269 | 39.0    | 3.3   | 53.4    | 1.6    | 145.2   | 4.9    | 99.3    | 49.2    | 1.27  | 2.41  | 0.00145  |
| LOC1053743 | 124.7   | 8.1   | 464.5   | 22.6   | 294.5   | 12.4   | 379.5   | 92.4    | 1.58  | 2.98  | <0,00001 |
| LOC1053793 | 537.1   | 26.5  | 34.7    | 2.3    | 33.6    | 1.0    | 34.1    | 1.7     | -3.97 | 0.06  | <0,00001 |
| LOC283454  | 1828.6  | 69.7  | 77.3    | 6.0    | 53.7    | 1.7    | 65.5    | 13.3    | -4.78 | 0.04  | <0,00001 |
| LOC284344  | 4665.3  | 366.0 | 66.1    | 9.4    | 820.4   | 17.3   | 443.3   | 403.4   | -2.64 | 0.16  | 0.00003  |
| LOC286254  | 2891.4  | 542.8 | 971.4   | 79.1   | 1295.3  | 288.0  | 1133.4  | 261.2   | -1.33 | 0.40  | <0,00001 |
| LOC338620  | 399.1   | 26.2  | 5387.8  | 692.0  | 3087.5  | 164.3  | 4237.6  | 1314.8  | 3.32  | 9.97  | <0,00001 |
| LOC388242  | 646.1   | 44.0  | 239.3   | 5.8    | 250.8   | 17.2   | 245.0   | 13.4    | -1.40 | 0.38  | <0,00001 |
| LOC643355  | 135.2   | 4.8   | 54.1    | 1.7    | 34.4    | 1.0    | 44.2    | 10.6    | -1.60 | 0.33  | <0,00001 |
| LOC644189  | 81.2    | 2.4   | 137.7   | 7.6    | 202.3   | 7.8    | 170.0   | 35.2    | 1.06  | 2.08  | <0,00001 |
| LOC644450  | 53.1    | 5.5   | 236.5   | 20.6   | 234.0   | 10.5   | 235.2   | 15.2    | 2.14  | 4.41  | <0,00001 |
| LOC727916  | 317.1   | 17.7  | 136.2   | 5.1    | 139.1   | 4.4    | 137.7   | 4.7     | -1.20 | 0.43  | <0,00001 |
| LOC730102  | 366.7   | 29.8  | 845.6   | 45.1   | 680.4   | 42.9   | 763.0   | 97.2    | 1.05  | 2.07  | <0,00001 |
| LPPR3      | 1981.8  | 79.1  | 1079.1  | 111.5  | 419.7   | 44.3   | 749.4   | 361.1   | -1.32 | 0.40  | 0.00030  |
| LPPR4      | 31.5    | 2.0   | 34.2    | 1.4    | 287.2   | 32.9   | 160.7   | 136.9   | 1.86  | 3.62  | 0.00269  |
| LRFN4      | 5851.8  | 539.6 | 2234.1  | 155.0  | 2250.2  | 65.7   | 2242.1  | 110.6   | -1.38 | 0.38  | <0,00001 |
| LRIF1      | 147.4   | 4.2   | 343.6   | 18.4   | 254.8   | 24.3   | 299.2   | 51.5    | 1.01  | 2.02  | <0,00001 |
| LRP1B      | 254.6   | 13.2  | 95.2    | 5.1    | 113.5   | 18.1   | 104.4   | 15.7    | -1.28 | 0.41  | <0,00001 |
| LRRC16A    | 95.0    | 5.4   | 178.3   | 16.7   | 211.3   | 14.9   | 194.8   | 22.9    | 1.04  | 2.05  | <0,00001 |
| LRRC17     | 8823.2  | 362.7 | 95.7    | 7.7    | 116.4   | 10.5   | 106.0   | 13.9    | -6.36 | 0.01  | <0,00001 |
| LRRC37A3   | 52.3    | 2.1   | 128.8   | 6.3    | 158.0   | 10.7   | 143.4   | 17.6    | 1.44  | 2.72  | <0,00001 |
| LRRC4C     | 88.5    | 5.8   | 287.1   | 39.0   | 386.8   | 12.1   | 336.9   | 59.6    | 1.91  | 3.75  | <0,00001 |
| LRRC59     | 2544.6  | 62.5  | 5673.9  | 305.9  | 4689.6  | 178.2  | 5181.7  | 574.9   | 1.02  | 2.03  | <0,00001 |
| LSR        | 756.4   | 49.9  | 293.3   | 11.2   | 227.2   | 13.9   | 260.2   | 37.2    | -1.53 | 0.35  | <0,00001 |
| LTBR       | 1134.7  | 66.0  | 1783.2  | 37.2   | 3092.1  | 83.7   | 2437.6  | 702.2   | 1.08  | 2.11  | <0,00001 |

|           |         |        |         |        |          |        |          |         |       |       |          |
|-----------|---------|--------|---------|--------|----------|--------|----------|---------|-------|-------|----------|
| LUZP2     | 1672.3  | 96.2   | 174.7   | 24.7   | 532.7    | 29.7   | 353.7    | 193.0   | -2.07 | 0.24  | <0,00001 |
| LY6D      | 175.8   | 2.3    | 67.8    | 1.5    | 64.7     | 4.8    | 66.2     | 3.7     | -1.41 | 0.38  | <0,00001 |
| LYPD2     | 76.4    | 3.7    | 38.1    | 1.8    | 37.8     | 1.8    | 37.9     | 1.7     | -1.01 | 0.50  | <0,00001 |
| LZTS3     | 169.9   | 4.1    | 584.3   | 21.0   | 261.3    | 17.1   | 422.8    | 173.6   | 1.26  | 2.39  | 0.00009  |
| MAB21L1   | 715.2   | 27.4   | 465.9   | 24.4   | 214.9    | 16.8   | 340.4    | 135.6   | -1.03 | 0.49  | 0.00102  |
| MAGEF1    | 7329.4  | 242.6  | 3221.9  | 46.8   | 3201.4   | 168.2  | 3211.6   | 114.8   | -1.19 | 0.44  | <0,00001 |
| MAGI2     | 251.0   | 10.9   | 107.2   | 7.8    | 108.3    | 8.3    | 107.7    | 7.5     | -1.22 | 0.43  | <0,00001 |
| MAL2      | 6625.2  | 439.8  | 167.0   | 15.7   | 35.6     | 4.0    | 101.3    | 71.0    | -5.31 | 0.03  | <0,00001 |
| MAMLD1    | 146.1   | 11.1   | 1985.3  | 280.1  | 4692.9   | 47.9   | 3339.1   | 1459.2  | 4.27  | 19.23 | <0,00001 |
| MAP3K1    | 91.7    | 8.0    | 44.1    | 0.6    | 43.5     | 3.4    | 43.8     | 2.3     | -1.07 | 0.48  | <0,00001 |
| MAP3K4    | 1049.7  | 70.1   | 1545.1  | 59.4   | 2910.9   | 166.3  | 2228.0   | 739.2   | 1.05  | 2.07  | 0.00005  |
| MAP3K7CL  | 46.7    | 2.5    | 1180.6  | 21.2   | 315.6    | 26.4   | 748.1    | 462.9   | 3.56  | 11.76 | <0,00001 |
| MARCKSL1  | 9415.8  | 398.3  | 4176.5  | 148.2  | 3704.8   | 224.0  | 3940.7   | 307.4   | -1.25 | 0.42  | <0,00001 |
| MARVELD1  | 24445.2 | 1355.5 | 63384.7 | 3175.8 | 80589.3  | 2776.8 | 71987.0  | 9601.9  | 1.55  | 2.93  | <0,00001 |
| MAST2     | 705.1   | 46.3   | 1327.0  | 59.8   | 1650.8   | 55.7   | 1488.9   | 181.1   | 1.07  | 2.10  | <0,00001 |
| MDFI      | 1359.4  | 93.5   | 93.7    | 6.8    | 113.7    | 3.2    | 103.7    | 11.8    | -3.70 | 0.08  | <0,00001 |
| MEIOB     | 132.5   | 10.9   | 47.1    | 2.8    | 58.5     | 2.5    | 52.8     | 6.6     | -1.32 | 0.40  | <0,00001 |
| METRNL    | 24394.1 | 932.9  | 6351.2  | 323.4  | 11372.5  | 544.2  | 8861.9   | 2715.8  | -1.42 | 0.37  | <0,00001 |
| METTL10   | 203.8   | 8.2    | 635.7   | 24.3   | 788.4    | 31.8   | 712.0    | 85.7    | 1.79  | 3.47  | <0,00001 |
| METTL7B   | 60.0    | 2.7    | 78.6    | 4.3    | 321.9    | 15.7   | 200.3    | 130.5   | 1.54  | 2.92  | 0.00162  |
| MEX3A     | 6266.0  | 281.2  | 2356.5  | 108.6  | 1597.7   | 96.7   | 1977.1   | 416.6   | -1.64 | 0.32  | <0,00001 |
| MFAP4     | 25796.6 | 1045.6 | 24866.8 | 5797.7 | 186410.8 | 3608.1 | 105638.8 | 86464.5 | 1.64  | 3.12  | 0.00634  |
| MFSD11    | 684.6   | 33.0   | 1057.4  | 27.3   | 1839.1   | 69.8   | 1448.2   | 420.7   | 1.05  | 2.08  | <0,00001 |
| MFSD7     | 274.1   | 20.0   | 947.5   | 21.9   | 1947.6   | 142.7  | 1447.6   | 542.8   | 2.31  | 4.95  | <0,00001 |
| MGARP     | 3519.1  | 165.3  | 622.9   | 39.2   | 183.7    | 5.8    | 403.3    | 236.2   | -2.85 | 0.14  | <0,00001 |
| MGAT4A    | 175.3   | 5.1    | 80.2    | 4.5    | 79.0     | 1.0    | 79.6     | 3.1     | -1.14 | 0.45  | <0,00001 |
| MGC24103  | 50.8    | 2.0    | 175.0   | 20.5   | 278.5    | 7.7    | 226.7    | 57.1    | 2.11  | 4.32  | <0,00001 |
| MGLL      | 692.1   | 30.4   | 3212.6  | 101.0  | 3337.9   | 130.4  | 3275.2   | 127.0   | 2.24  | 4.73  | <0,00001 |
| MGP       | 2879.1  | 414.5  | 49.5    | 5.4    | 667.3    | 89.8   | 358.4    | 335.4   | -2.30 | 0.20  | 0.00043  |
| MIR31HG   | 122.5   | 2.5    | 1049.3  | 105.6  | 769.5    | 31.4   | 909.4    | 166.0   | 2.86  | 7.26  | <0,00001 |
| MIR7515HG | 81.4    | 4.0    | 35.2    | 2.2    | 33.6     | 1.2    | 34.4     | 1.9     | -1.24 | 0.42  | <0,00001 |
| MISP      | 116.9   | 7.6    | 51.7    | 5.8    | 45.2     | 0.8    | 48.4     | 5.2     | -1.27 | 0.41  | <0,00001 |
| MLANA     | 286.9   | 16.6   | 40.5    | 2.0    | 36.5     | 1.2    | 38.5     | 2.7     | -2.90 | 0.13  | <0,00001 |
| MLIP      | 137.9   | 10.6   | 37.5    | 2.4    | 39.9     | 1.2    | 38.7     | 2.2     | -1.82 | 0.28  | <0,00001 |
| MMP11     | 4251.6  | 143.6  | 978.8   | 36.8   | 933.3    | 44.6   | 956.0    | 45.0    | -2.15 | 0.23  | <0,00001 |
| MMP24     | 42.1    | 2.4    | 202.1   | 9.3    | 67.9     | 3.6    | 135.0    | 72.0    | 1.55  | 2.93  | 0.00021  |
| MMP3      | 31.5    | 1.5    | 120.7   | 17.5   | 37.6     | 2.5    | 79.1     | 45.9    | 1.20  | 2.30  | 0.00863  |
| MMP7      | 40.0    | 2.6    | 86.6    | 14.7   | 143.1    | 9.1    | 114.9    | 32.3    | 1.48  | 2.79  | <0,00001 |
| MOK       | 734.6   | 57.7   | 14461.4 | 1163.4 | 1367.9   | 53.8   | 7914.6   | 7040.2  | 2.61  | 6.08  | 0.00003  |
| MORC4     | 2011.1  | 72.3   | 3600.5  | 121.6  | 6896.4   | 226.5  | 5248.5   | 1769.7  | 1.34  | 2.53  | <0,00001 |
| MOXD1     | 443.9   | 17.9   | 755.1   | 63.1   | 1335.5   | 54.1   | 1045.3   | 315.0   | 1.20  | 2.30  | <0,00001 |
| MPP2      | 226.6   | 11.1   | 647.2   | 13.5   | 338.2    | 28.6   | 492.7    | 166.5   | 1.08  | 2.12  | 0.00007  |
| MPP4      | 35.0    | 4.5    | 155.5   | 9.7    | 132.9    | 15.8   | 144.2    | 17.1    | 2.03  | 4.08  | <0,00001 |

|         |         |       |         |        |         |       |         |        |       |       |          |
|---------|---------|-------|---------|--------|---------|-------|---------|--------|-------|-------|----------|
| MRC2    | 354.4   | 35.6  | 489.6   | 64.4   | 1584.7  | 214.9 | 1037.1  | 603.5  | 1.41  | 2.66  | 0.00112  |
| MSX2P1  | 311.2   | 22.6  | 132.9   | 2.1    | 173.8   | 10.5  | 153.4   | 23.0   | -1.02 | 0.49  | <0,00001 |
| MT1A    | 2836.0  | 272.4 | 14758.7 | 1418.5 | 3169.4  | 500.5 | 8964.0  | 6272.5 | 1.44  | 2.72  | 0.00571  |
| MT1B    | 300.1   | 24.4  | 15480.3 | 1747.9 | 510.3   | 21.8  | 7995.3  | 8083.2 | 2.90  | 7.47  | 0.00003  |
| MT1F    | 32.3    | 1.4   | 171.2   | 21.0   | 35.2    | 0.7   | 103.2   | 74.0   | 1.45  | 2.72  | 0.00807  |
| MT1H    | 149.0   | 1.6   | 16873.5 | 1910.6 | 334.0   | 23.5  | 8603.7  | 8928.8 | 2.74  | 6.69  | 0.00020  |
| MT1HL1  | 253.0   | 10.1  | 9323.9  | 913.5  | 384.1   | 16.0  | 4854.0  | 4815.8 | 2.76  | 6.78  | 0.00006  |
| MT1M    | 42.0    | 1.2   | 1399.9  | 163.7  | 52.8    | 2.6   | 726.3   | 728.0  | 2.62  | 6.13  | 0.00018  |
| MUM1L1  | 382.3   | 34.0  | 38.4    | 9.0    | 37.5    | 2.2   | 38.0    | 6.1    | -3.32 | 0.10  | <0,00001 |
| MVP     | 13779.4 | 309.5 | 40257.9 | 1436.7 | 34741.9 | 602.3 | 37499.9 | 3119.8 | 1.44  | 2.72  | <0,00001 |
| MYL7    | 68.5    | 2.2   | 447.1   | 61.7   | 142.7   | 7.8   | 294.9   | 167.7  | 1.93  | 3.80  | <0,00001 |
| MYLK2   | 66.6    | 3.2   | 144.1   | 11.5   | 218.1   | 14.9  | 181.1   | 41.5   | 1.42  | 2.68  | <0,00001 |
| MYO5C   | 1801.5  | 70.9  | 463.0   | 44.0   | 81.7    | 1.4   | 272.4   | 205.9  | -2.33 | 0.20  | 0.00001  |
| MYOC    | 92.5    | 6.4   | 40.0    | 5.7    | 34.9    | 1.0   | 37.4    | 4.7    | -1.31 | 0.40  | <0,00001 |
| NALCN   | 64.6    | 4.9   | 167.3   | 14.1   | 106.1   | 2.1   | 136.7   | 34.0   | 1.06  | 2.08  | <0,00001 |
| NAT1    | 149.4   | 7.8   | 328.7   | 21.5   | 354.5   | 24.4  | 341.6   | 25.4   | 1.19  | 2.28  | <0,00001 |
| NBEA    | 8501.2  | 338.3 | 2611.4  | 66.7   | 1552.5  | 85.3  | 2081.9  | 570.4  | -1.98 | 0.25  | <0,00001 |
| NBL1    | 235.4   | 20.1  | 463.3   | 25.2   | 742.7   | 44.5  | 603.0   | 153.1  | 1.33  | 2.51  | <0,00001 |
| NBPF9   | 370.6   | 78.8  | 923.6   | 105.5  | 661.8   | 132.6 | 792.7   | 178.6  | 1.07  | 2.11  | <0,00001 |
| NCALD   | 246.1   | 8.7   | 39.6    | 0.8    | 52.1    | 2.5   | 45.8    | 6.9    | -2.43 | 0.19  | <0,00001 |
| NCEH1   | 863.3   | 93.5  | 2799.2  | 324.9  | 1372.1  | 63.9  | 2085.6  | 793.0  | 1.22  | 2.34  | 0.00003  |
| NDN     | 3909.7  | 99.0  | 1703.9  | 124.2  | 1797.3  | 55.7  | 1750.6  | 102.2  | -1.16 | 0.45  | <0,00001 |
| NDUFAF4 | 2086.9  | 72.6  | 975.6   | 27.5   | 817.9   | 58.2  | 896.7   | 94.2   | -1.21 | 0.43  | <0,00001 |
| NEDD4   | 516.3   | 5.3   | 1595.0  | 86.7   | 1654.2  | 30.7  | 1624.6  | 68.0   | 1.65  | 3.14  | <0,00001 |
| NEFH    | 969.8   | 92.7  | 2430.6  | 98.1   | 5230.8  | 267.6 | 3830.7  | 1508.4 | 1.90  | 3.72  | <0,00001 |
| NEGR1   | 39.3    | 1.3   | 155.3   | 16.2   | 52.9    | 3.2   | 104.1   | 55.8   | 1.29  | 2.44  | 0.00231  |
| NEK7    | 60.2    | 3.6   | 408.3   | 35.4   | 115.8   | 9.9   | 262.1   | 158.2  | 1.92  | 3.77  | 0.00002  |
| NELL2   | 3877.2  | 243.3 | 64.3    | 3.3    | 39.7    | 3.8   | 52.0    | 13.5   | -6.15 | 0.01  | <0,00001 |
| NES     | 64.2    | 1.0   | 2252.1  | 511.9  | 2414.2  | 248.3 | 2333.1  | 382.4  | 5.12  | 34.85 | <0,00001 |
| NEURL1B | 190.1   | 5.4   | 66.9    | 9.8    | 50.9    | 7.3   | 58.9    | 11.7   | -1.68 | 0.31  | <0,00001 |
| NFKBIZ  | 282.8   | 44.3  | 1056.5  | 106.2  | 1020.9  | 213.1 | 1038.7  | 157.0  | 1.86  | 3.63  | <0,00001 |
| NGF     | 393.9   | 22.1  | 79.7    | 5.8    | 149.6   | 7.7   | 114.6   | 37.9   | -1.73 | 0.30  | <0,00001 |
| NHS     | 164.2   | 32.9  | 522.2   | 16.1   | 804.3   | 45.0  | 663.2   | 154.0  | 1.97  | 3.93  | <0,00001 |
| NKX3-1  | 287.1   | 15.1  | 7333.2  | 310.4  | 328.7   | 15.7  | 3831.0  | 3749.6 | 2.49  | 5.62  | 0.00030  |
| NLGN1   | 76.3    | 5.7   | 40.4    | 1.4    | 31.1    | 2.1   | 35.8    | 5.2    | -1.08 | 0.47  | <0,00001 |
| NLRP2   | 548.0   | 28.1  | 39.2    | 2.2    | 34.6    | 1.4   | 36.9    | 3.0    | -3.89 | 0.07  | <0,00001 |
| NLRP2P  | 103.5   | 2.7   | 32.9    | 1.5    | 32.9    | 1.2   | 32.9    | 1.3    | -1.65 | 0.32  | <0,00001 |
| NMU     | 172.4   | 11.7  | 42.3    | 3.3    | 61.7    | 5.0   | 52.0    | 11.1   | -1.72 | 0.30  | <0,00001 |
| NNAT    | 562.7   | 29.2  | 41.3    | 1.7    | 42.7    | 3.1   | 42.0    | 2.4    | -3.74 | 0.07  | <0,00001 |
| NNMT    | 1550.8  | 116.5 | 13950.5 | 520.3  | 2793.5  | 156.9 | 8372.0  | 5974.2 | 2.09  | 4.26  | 0.00005  |
| NPAS1   | 816.1   | 40.4  | 285.0   | 48.9   | 222.5   | 13.8  | 253.7   | 47.1   | -1.67 | 0.31  | <0,00001 |
| NQO1    | 58.5    | 1.5   | 138.7   | 12.5   | 251.5   | 7.1   | 195.1   | 61.0   | 1.69  | 3.22  | <0,00001 |
| NRBF2   | 494.5   | 18.5  | 672.5   | 14.0   | 1467.6  | 32.7  | 1070.0  | 425.6  | 1.06  | 2.09  | 0.00055  |

|         |         |        |         |        |         |       |         |        |       |       |          |
|---------|---------|--------|---------|--------|---------|-------|---------|--------|-------|-------|----------|
| NTAN1   | 1594.9  | 56.1   | 2973.5  | 27.0   | 3750.0  | 270.9 | 3361.8  | 451.7  | 1.07  | 2.10  | <0,00001 |
| NTF4    | 182.1   | 12.0   | 34.1    | 1.8    | 82.4    | 1.8   | 58.2    | 25.9   | -1.57 | 0.34  | <0,00001 |
| NTNG1   | 205.5   | 19.8   | 597.8   | 50.9   | 392.5   | 29.1  | 495.2   | 116.3  | 1.25  | 2.37  | <0,00001 |
| NTNG2   | 72.8    | 44.1   | 140.4   | 12.1   | 177.2   | 10.5  | 158.8   | 22.2   | 1.09  | 2.13  | 0.00013  |
| NTPCR   | 4250.1  | 144.2  | 1821.9  | 108.0  | 2225.9  | 139.6 | 2023.9  | 244.9  | -1.07 | 0.48  | <0,00001 |
| NUAK1   | 9999.3  | 617.5  | 5366.7  | 224.6  | 2628.6  | 140.7 | 3997.7  | 1473.8 | -1.27 | 0.41  | 0.00001  |
| NUBP1   | 986.9   | 46.4   | 530.6   | 14.7   | 438.6   | 34.9  | 484.6   | 55.0   | -1.02 | 0.49  | <0,00001 |
| NUPR1   | 6581.7  | 574.3  | 7790.1  | 1361.4 | 21042.1 | 550.8 | 14416.1 | 7148.4 | 1.05  | 2.07  | 0.00662  |
| NYNRIN  | 345.0   | 11.8   | 72.2    | 4.2    | 84.0    | 15.0  | 78.1    | 12.0   | -2.14 | 0.23  | <0,00001 |
| OCA2    | 518.1   | 21.9   | 34.9    | 2.1    | 31.7    | 3.6   | 33.3    | 3.2    | -3.96 | 0.06  | <0,00001 |
| OGDHL   | 3509.1  | 232.4  | 90.3    | 15.5   | 151.6   | 15.5  | 120.9   | 35.8   | -4.76 | 0.04  | <0,00001 |
| OPLAH   | 3837.1  | 266.0  | 1384.3  | 107.8  | 549.1   | 44.3  | 966.7   | 453.0  | -1.87 | 0.27  | <0,00001 |
| OPN3    | 723.3   | 34.4   | 405.1   | 33.0   | 156.7   | 5.0   | 280.9   | 134.5  | -1.28 | 0.41  | 0.00042  |
| OR52K3P | 89.5    | 5.8    | 36.9    | 1.3    | 41.8    | 4.2   | 39.3    | 3.9    | -1.18 | 0.44  | <0,00001 |
| OSBPL5  | 2571.9  | 171.6  | 6410.0  | 385.1  | 4656.5  | 246.4 | 5533.3  | 983.9  | 1.09  | 2.14  | <0,00001 |
| OTX2    | 2562.6  | 28.5   | 320.9   | 29.1   | 820.9   | 35.1  | 570.9   | 268.9  | -2.04 | 0.24  | <0,00001 |
| PALM    | 35235.8 | 2757.7 | 16547.0 | 953.6  | 15126.5 | 792.8 | 15836.7 | 1111.6 | -1.15 | 0.45  | <0,00001 |
| PAMR1   | 40.3    | 4.7    | 682.8   | 211.7  | 3824.3  | 209.9 | 2253.6  | 1690.5 | 4.77  | 27.22 | <0,00001 |
| PARD6A  | 396.7   | 9.8    | 248.4   | 10.4   | 114.2   | 5.2   | 181.3   | 72.1   | -1.08 | 0.47  | 0.00047  |
| PAX6    | 1426.2  | 36.1   | 393.2   | 33.3   | 260.0   | 8.0   | 326.6   | 74.6   | -2.10 | 0.23  | <0,00001 |
| PCDH19  | 41.5    | 2.3    | 442.1   | 56.5   | 86.7    | 4.4   | 264.4   | 193.6  | 2.27  | 4.84  | 0.00002  |
| PCDH20  | 127.6   | 2.7    | 58.6    | 2.3    | 33.2    | 1.6   | 45.9    | 13.7   | -1.45 | 0.37  | <0,00001 |
| PCDH8   | 148.0   | 11.9   | 44.7    | 3.6    | 37.4    | 3.3   | 41.0    | 5.1    | -1.84 | 0.28  | <0,00001 |
| PCDHA1  | 86.8    | 9.0    | 308.6   | 23.7   | 141.5   | 14.1  | 225.1   | 91.1   | 1.31  | 2.48  | 0.00005  |
| PCDHA5  | 94.8    | 6.8    | 310.0   | 17.3   | 138.0   | 8.0   | 224.0   | 92.8   | 1.18  | 2.27  | 0.00034  |
| PCDHB10 | 54.5    | 2.5    | 115.3   | 12.6   | 190.4   | 9.7   | 152.9   | 41.5   | 1.46  | 2.75  | <0,00001 |
| PCDHB11 | 332.5   | 27.4   | 1256.9  | 143.1  | 2232.8  | 199.4 | 1744.8  | 545.8  | 2.32  | 5.00  | <0,00001 |
| PCDHB13 | 312.2   | 24.7   | 828.7   | 86.4   | 497.0   | 15.1  | 662.8   | 186.4  | 1.06  | 2.09  | <0,00001 |
| PCDHB14 | 89.6    | 4.3    | 447.5   | 90.8   | 1315.7  | 62.1  | 881.6   | 469.6  | 3.03  | 8.19  | <0,00001 |
| PCDHB16 | 51.2    | 3.1    | 342.8   | 70.9   | 60.0    | 2.7   | 201.4   | 158.2  | 1.66  | 3.15  | 0.00345  |
| PCDHB7  | 118.0   | 6.7    | 498.4   | 46.2   | 200.7   | 5.0   | 349.5   | 162.0  | 1.48  | 2.78  | 0.00003  |
| PCDHB8  | 56.4    | 4.6    | 151.2   | 23.9   | 88.5    | 2.7   | 119.8   | 37.0   | 1.06  | 2.08  | 0.00005  |
| PCDHGB4 | 156.7   | 12.2   | 482.9   | 10.0   | 246.1   | 19.4  | 364.5   | 127.4  | 1.18  | 2.26  | 0.00003  |
| PCED1B  | 237.2   | 4.8    | 739.7   | 30.0   | 800.3   | 74.8  | 770.0   | 61.9   | 1.70  | 3.24  | <0,00001 |
| PCOLCE2 | 400.1   | 30.5   | 1473.0  | 86.3   | 1865.3  | 117.3 | 1669.2  | 230.4  | 2.05  | 4.13  | <0,00001 |
| PCP4    | 251.7   | 25.0   | 47.2    | 3.1    | 60.1    | 4.7   | 53.7    | 7.8    | -2.22 | 0.21  | <0,00001 |
| PCSK9   | 116.5   | 12.3   | 53.4    | 5.1    | 39.5    | 3.6   | 46.5    | 8.5    | -1.32 | 0.40  | <0,00001 |
| PDGFA   | 239.9   | 7.7    | 827.7   | 167.8  | 879.9   | 292.1 | 853.8   | 222.3  | 1.80  | 3.48  | <0,00001 |
| PDGFRL  | 269.4   | 35.3   | 500.1   | 61.2   | 687.0   | 40.5  | 593.6   | 110.8  | 1.12  | 2.18  | <0,00001 |
| PDLIM1  | 863.9   | 30.3   | 2090.9  | 128.9  | 2741.2  | 180.1 | 2416.0  | 376.7  | 1.47  | 2.77  | <0,00001 |
| PDP1    | 191.9   | 35.3   | 386.3   | 43.4   | 527.7   | 129.8 | 457.0   | 117.2  | 1.23  | 2.34  | <0,00001 |
| PDXP    | 1261.0  | 46.3   | 517.5   | 26.7   | 704.9   | 51.1  | 611.2   | 107.1  | -1.04 | 0.49  | <0,00001 |
| PEG10   | 72.4    | 4.9    | 285.9   | 56.3   | 1735.2  | 141.2 | 1010.6  | 781.0  | 3.14  | 8.84  | <0,00001 |



|           |         |        |         |        |         |        |         |         |       |       |          |
|-----------|---------|--------|---------|--------|---------|--------|---------|---------|-------|-------|----------|
| PELI2     | 557.5   | 35.7   | 69.3    | 4.7    | 288.1   | 15.9   | 178.7   | 117.5   | -1.46 | 0.36  | 0.00262  |
| PENK      | 750.1   | 224.5  | 187.3   | 10.8   | 485.2   | 43.5   | 336.2   | 161.9   | -1.08 | 0.47  | 0.00554  |
| PF4V1     | 33.0    | 2.1    | 36.2    | 1.7    | 785.5   | 138.0  | 410.8   | 410.6   | 2.42  | 5.35  | 0.00048  |
| PFKFB4    | 717.8   | 43.9   | 874.0   | 113.7  | 2493.9  | 243.6  | 1684.0  | 883.6   | 1.14  | 2.20  | 0.00449  |
| PGAM2     | 624.4   | 29.6   | 51.5    | 3.6    | 68.1    | 6.3    | 59.8    | 10.0    | -3.38 | 0.10  | <0,00001 |
| PGBD3     | 905.9   | 59.2   | 1668.1  | 51.5   | 2498.7  | 69.8   | 2083.4  | 447.6   | 1.18  | 2.27  | <0,00001 |
| PGF       | 895.7   | 77.6   | 144.6   | 9.0    | 160.4   | 11.0   | 152.5   | 12.6    | -2.55 | 0.17  | <0,00001 |
| PGM5P4-AS | 734.8   | 72.2   | 449.6   | 31.2   | 201.8   | 12.4   | 325.7   | 134.3   | -1.12 | 0.46  | 0.00051  |
| PHYHIP    | 197.0   | 9.7    | 51.7    | 3.9    | 53.2    | 4.2    | 52.4    | 3.8     | -1.91 | 0.27  | <0,00001 |
| PIGZ      | 202.0   | 10.7   | 3542.7  | 118.2  | 1649.1  | 96.2   | 2595.9  | 1017.0  | 3.52  | 11.48 | <0,00001 |
| PIM3      | 12686.9 | 1615.7 | 4849.1  | 296.5  | 4203.5  | 263.6  | 4526.3  | 431.9   | -1.48 | 0.36  | <0,00001 |
| PIP5K1B   | 767.6   | 25.3   | 116.2   | 17.9   | 65.8    | 12.0   | 91.0    | 30.4    | -2.99 | 0.13  | <0,00001 |
| PITX2     | 193.8   | 18.7   | 1146.3  | 220.6  | 2322.1  | 140.1  | 1734.2  | 651.4   | 3.03  | 8.15  | <0,00001 |
| PKDCC     | 357.9   | 11.0   | 166.8   | 10.7   | 167.3   | 4.0    | 167.0   | 7.5     | -1.10 | 0.47  | <0,00001 |
| PKIB      | 100.5   | 12.0   | 1379.0  | 43.9   | 664.5   | 68.6   | 1021.8  | 385.6   | 3.21  | 9.23  | <0,00001 |
| PKN3      | 286.1   | 13.2   | 89.2    | 4.0    | 75.7    | 3.0    | 82.5    | 7.9     | -1.80 | 0.29  | <0,00001 |
| PKNOX2    | 131.1   | 15.3   | 630.4   | 93.0   | 1062.9  | 77.0   | 846.7   | 244.3   | 2.62  | 6.15  | <0,00001 |
| PLA2G16   | 60464.3 | 2824.0 | 19530.0 | 1381.9 | 19982.3 | 712.3  | 19756.1 | 1046.1  | -1.61 | 0.33  | <0,00001 |
| PLA2R1    | 400.1   | 23.9   | 82.5    | 4.6    | 206.9   | 9.0    | 144.7   | 66.8    | -1.39 | 0.38  | 0.00006  |
| PLAT      | 173.4   | 10.7   | 458.4   | 157.3  | 2013.6  | 340.5  | 1236.0  | 866.8   | 2.45  | 5.46  | <0,00001 |
| PLAU      | 10576.9 | 524.6  | 12135.5 | 2540.0 | 42141.6 | 2712.2 | 27138.5 | 16222.4 | 1.23  | 2.34  | 0.00713  |
| PLAUR     | 633.8   | 29.0   | 2687.4  | 256.5  | 1533.0  | 84.9   | 2110.2  | 641.9   | 1.69  | 3.23  | <0,00001 |
| PLBD1     | 889.5   | 49.6   | 300.5   | 24.6   | 250.6   | 19.3   | 275.6   | 33.6    | -1.68 | 0.31  | <0,00001 |
| PLCB4     | 559.0   | 48.9   | 2881.1  | 458.0  | 2023.3  | 343.6  | 2452.2  | 592.3   | 2.10  | 4.27  | <0,00001 |
| PLCD3     | 1587.4  | 135.6  | 538.1   | 38.5   | 891.6   | 106.0  | 714.8   | 202.9   | -1.13 | 0.46  | <0,00001 |
| PLCD4     | 43.5    | 1.6    | 72.1    | 5.0    | 234.6   | 11.7   | 153.4   | 87.2    | 1.66  | 3.16  | 0.00014  |
| PLCE1     | 7512.2  | 412.5  | 1271.2  | 57.6   | 2943.0  | 297.4  | 2107.1  | 915.3   | -1.75 | 0.30  | <0,00001 |
| PLEK2     | 148.9   | 5.6    | 582.6   | 70.9   | 434.4   | 11.5   | 508.5   | 92.1    | 1.75  | 3.37  | <0,00001 |
| PLEKHG4   | 90.6    | 8.8    | 382.2   | 60.1   | 134.2   | 10.3   | 258.2   | 138.5   | 1.40  | 2.63  | 0.00059  |
| PLEKHG5   | 1552.9  | 77.3   | 3115.8  | 120.4  | 3824.5  | 355.7  | 3470.2  | 451.6   | 1.15  | 2.23  | <0,00001 |
| PLEKHO2   | 507.6   | 30.4   | 1796.2  | 84.3   | 2653.8  | 213.2  | 2225.0  | 482.4   | 2.10  | 4.29  | <0,00001 |
| PLOD2     | 2614.2  | 202.5  | 11913.6 | 1479.7 | 8184.1  | 1295.5 | 10048.9 | 2373.1  | 1.91  | 3.76  | <0,00001 |
| PLP2      | 1260.2  | 84.2   | 2848.6  | 101.4  | 3024.7  | 311.0  | 2936.7  | 233.9   | 1.22  | 2.32  | <0,00001 |
| PLS1      | 319.8   | 10.2   | 144.1   | 4.2    | 93.8    | 4.7    | 118.9   | 27.2    | -1.41 | 0.38  | <0,00001 |
| PLSCR1    | 256.0   | 22.4   | 772.6   | 55.9   | 1163.5  | 91.6   | 968.0   | 220.4   | 1.89  | 3.70  | <0,00001 |
| PLSCR4    | 57.7    | 2.4    | 572.5   | 16.9   | 470.2   | 46.0   | 521.3   | 63.4    | 3.16  | 8.93  | <0,00001 |
| PLXDC2    | 1029.5  | 68.8   | 2041.1  | 487.9  | 6911.6  | 490.6  | 4476.3  | 2642.5  | 1.91  | 3.77  | 0.00001  |
| PMAIP1    | 649.1   | 72.5   | 295.2   | 13.7   | 273.7   | 36.9   | 284.5   | 28.2    | -1.18 | 0.44  | <0,00001 |
| PMCH      | 40.3    | 2.5    | 35.6    | 1.0    | 376.4   | 36.9   | 206.0   | 183.8   | 1.79  | 3.47  | 0.00577  |
| PMCHL1    | 38.1    | 0.7    | 42.3    | 9.5    | 292.9   | 13.2   | 167.6   | 134.4   | 1.75  | 3.36  | 0.00329  |
| PMP22     | 2791.6  | 220.3  | 3854.6  | 172.7  | 30297.5 | 870.7  | 17076.0 | 14146.3 | 2.10  | 4.27  | 0.00038  |
| PNCK      | 117.4   | 3.7    | 45.8    | 2.5    | 67.0    | 4.3    | 56.4    | 11.8    | -1.05 | 0.48  | <0,00001 |
| PNMA5     | 2076.6  | 95.3   | 782.8   | 36.4   | 891.3   | 47.9   | 837.0   | 70.1    | -1.31 | 0.40  | <0,00001 |

|           |        |       |         |        |         |        |         |         |       |       |          |
|-----------|--------|-------|---------|--------|---------|--------|---------|---------|-------|-------|----------|
| PODNL1    | 128.1  | 11.9  | 545.7   | 79.2   | 2121.3  | 54.7   | 1333.5  | 844.5   | 3.00  | 7.99  | <0,00001 |
| PODXL     | 5324.3 | 176.4 | 541.5   | 25.7   | 119.1   | 5.3    | 330.3   | 226.5   | -3.53 | 0.09  | <0,00001 |
| POMC      | 167.2  | 6.0   | 55.8    | 1.6    | 47.9    | 3.4    | 51.9    | 4.9     | -1.69 | 0.31  | <0,00001 |
| PON2      | 6181.3 | 163.6 | 10909.5 | 832.2  | 14354.3 | 566.0  | 12631.9 | 1955.6  | 1.02  | 2.03  | <0,00001 |
| POPDC3    | 50.5   | 5.2   | 139.5   | 3.7    | 144.8   | 11.1   | 142.2   | 8.1     | 1.49  | 2.80  | <0,00001 |
| POSTN     | 92.3   | 11.4  | 1225.1  | 436.9  | 792.3   | 92.1   | 1008.7  | 372.7   | 3.33  | 10.08 | <0,00001 |
| PP12613   | 1176.2 | 157.8 | 40.1    | 1.7    | 394.9   | 57.5   | 217.5   | 193.3   | -1.94 | 0.26  | 0.00200  |
| PPAP2A    | 1485.2 | 62.2  | 1758.9  | 335.8  | 12063.5 | 252.9  | 6911.2  | 5514.9  | 1.82  | 3.52  | 0.00170  |
| PPAP2B    | 456.5  | 25.5  | 452.6   | 47.1   | 3709.9  | 121.5  | 2081.2  | 1743.2  | 1.75  | 3.35  | 0.00413  |
| PPAPDC3   | 525.9  | 29.9  | 33.3    | 1.4    | 32.4    | 0.9    | 32.9    | 1.2     | -4.00 | 0.06  | <0,00001 |
| PPARG     | 757.6  | 16.9  | 125.3   | 13.9   | 123.1   | 7.5    | 124.2   | 10.4    | -2.61 | 0.16  | <0,00001 |
| PPL       | 1176.1 | 88.0  | 464.1   | 25.1   | 352.8   | 27.0   | 408.4   | 64.2    | -1.51 | 0.35  | <0,00001 |
| PPP1R14A  | 568.3  | 23.1  | 91.3    | 2.0    | 96.4    | 4.3    | 93.8    | 4.1     | -2.60 | 0.17  | <0,00001 |
| PPP1R14C  | 82.4   | 5.2   | 135.8   | 13.9   | 379.6   | 50.7   | 257.7   | 134.8   | 1.52  | 2.88  | 0.00011  |
| PPP1R1C   | 67.6   | 2.1   | 114.8   | 7.3    | 685.5   | 33.6   | 400.2   | 305.9   | 2.14  | 4.42  | 0.00010  |
| PPP1R26   | 2317.4 | 116.7 | 941.5   | 42.2   | 790.2   | 29.6   | 865.9   | 87.6    | -1.41 | 0.38  | <0,00001 |
| PPP1R3C   | 948.1  | 61.3  | 7961.5  | 1342.6 | 28412.5 | 1508.8 | 18187.0 | 11011.2 | 3.82  | 14.16 | <0,00001 |
| PPP2R3B   | 2728.4 | 114.9 | 1246.6  | 106.7  | 875.3   | 40.1   | 1060.9  | 212.0   | -1.35 | 0.39  | <0,00001 |
| PRADC1    | 493.5  | 37.6  | 754.5   | 16.5   | 1301.2  | 155.6  | 1027.9  | 309.7   | 1.03  | 2.04  | 0.00001  |
| PRG4      | 44.6   | 4.5   | 37.7    | 2.0    | 879.9   | 75.0   | 458.8   | 452.9   | 2.23  | 4.70  | 0.00146  |
| PRINS     | 729.3  | 115.0 | 171.3   | 18.3   | 250.0   | 26.0   | 210.6   | 46.9    | -1.77 | 0.29  | <0,00001 |
| PRMT9     | 1608.5 | 55.2  | 598.9   | 39.5   | 773.7   | 62.5   | 686.3   | 105.2   | -1.22 | 0.43  | <0,00001 |
| PROCR     | 2725.4 | 88.5  | 20754.5 | 967.8  | 10419.7 | 489.4  | 15587.1 | 5569.6  | 2.43  | 5.38  | <0,00001 |
| PRODH     | 212.8  | 12.7  | 51.0    | 4.1    | 56.5    | 1.3    | 53.7    | 4.1     | -1.99 | 0.25  | <0,00001 |
| PROM1     | 84.7   | 3.0   | 31.9    | 1.5    | 30.3    | 1.4    | 31.1    | 1.6     | -1.46 | 0.36  | <0,00001 |
| PRPH      | 208.5  | 45.4  | 69.0    | 6.3    | 50.8    | 3.0    | 59.9    | 10.8    | -1.78 | 0.29  | <0,00001 |
| PRR5-ARHG | 220.2  | 9.6   | 57.4    | 3.5    | 49.8    | 1.4    | 53.6    | 4.8     | -2.03 | 0.24  | <0,00001 |
| PRRT3     | 339.1  | 45.2  | 1816.9  | 127.0  | 1902.9  | 176.0  | 1859.9  | 149.3   | 2.45  | 5.45  | <0,00001 |
| PRRX1     | 265.6  | 18.3  | 36.9    | 1.9    | 115.6   | 8.3    | 76.3    | 42.5    | -1.67 | 0.31  | 0.00004  |
| PRSS36    | 138.1  | 9.6   | 1034.9  | 105.9  | 642.9   | 125.4  | 838.9   | 235.5   | 2.54  | 5.80  | <0,00001 |
| PRSS8     | 570.6  | 19.6  | 101.8   | 2.7    | 87.6    | 3.9    | 94.7    | 8.2     | -2.59 | 0.17  | <0,00001 |
| PRTFDC1   | 333.8  | 19.6  | 401.3   | 26.7   | 1201.0  | 74.4   | 801.1   | 430.6   | 1.17  | 2.24  | 0.00458  |
| PSD2      | 51.5   | 3.1   | 383.4   | 17.2   | 217.9   | 4.5    | 300.6   | 89.3    | 2.49  | 5.60  | <0,00001 |
| PSD4      | 77.7   | 4.9   | 207.4   | 16.7   | 149.8   | 12.3   | 178.6   | 33.7    | 1.19  | 2.28  | <0,00001 |
| PSG1      | 908.2  | 61.5  | 72.9    | 4.5    | 180.1   | 6.7    | 126.5   | 57.5    | -2.70 | 0.15  | <0,00001 |
| PSG6      | 8009.7 | 577.4 | 646.7   | 39.9   | 1347.9  | 95.2   | 997.3   | 380.9   | -2.89 | 0.13  | <0,00001 |
| PSG7      | 1152.5 | 42.8  | 48.4    | 2.0    | 191.3   | 5.9    | 119.8   | 76.5    | -2.94 | 0.13  | <0,00001 |
| PTGER2    | 82.7   | 5.6   | 323.3   | 18.7   | 399.9   | 20.4   | 361.6   | 44.8    | 2.12  | 4.34  | <0,00001 |
| PTGES     | 156.6  | 8.8   | 62.6    | 14.6   | 33.6    | 1.0    | 48.1    | 18.2    | -1.66 | 0.32  | <0,00001 |
| PTGFRN    | 151.3  | 6.8   | 66.5    | 3.3    | 49.8    | 3.8    | 58.1    | 9.5     | -1.38 | 0.38  | <0,00001 |
| PTGR1     | 3629.4 | 289.1 | 6082.2  | 411.3  | 12604.6 | 333.5  | 9343.4  | 3503.5  | 1.31  | 2.48  | <0,00001 |
| PTPN6     | 125.3  | 3.6   | 54.8    | 0.3    | 58.0    | 3.1    | 56.4    | 2.7     | -1.15 | 0.45  | <0,00001 |
| PTPRD     | 131.5  | 14.0  | 35.5    | 2.1    | 43.6    | 2.0    | 39.6    | 4.7     | -1.73 | 0.30  | <0,00001 |

|         |         |        |         |        |         |       |         |        |       |      |          |
|---------|---------|--------|---------|--------|---------|-------|---------|--------|-------|------|----------|
| PTPRN   | 80.4    | 6.2    | 319.2   | 27.4   | 92.0    | 3.6   | 205.6   | 122.8  | 1.22  | 2.33 | 0.00850  |
| PTPRU   | 612.7   | 23.2   | 326.3   | 11.2   | 214.7   | 16.1  | 270.5   | 61.1   | -1.16 | 0.45 | <0,00001 |
| PTTG1   | 2901.6  | 43.5   | 939.5   | 52.7   | 1718.1  | 42.4  | 1328.8  | 418.5  | -1.10 | 0.47 | 0.00001  |
| RAB15   | 16614.1 | 1114.4 | 7767.5  | 281.0  | 5054.2  | 318.1 | 6410.9  | 1476.7 | -1.35 | 0.39 | <0,00001 |
| RAB20   | 213.5   | 10.3   | 85.7    | 8.8    | 78.2    | 7.4   | 81.9    | 8.6    | -1.38 | 0.38 | <0,00001 |
| RAB33A  | 1606.5  | 80.6   | 276.9   | 14.1   | 423.4   | 38.1  | 350.1   | 82.7   | -2.17 | 0.22 | <0,00001 |
| RAB38   | 120.5   | 5.0    | 47.3    | 2.4    | 55.7    | 3.3   | 51.5    | 5.2    | -1.23 | 0.43 | <0,00001 |
| RAD51C  | 3580.1  | 132.8  | 1332.5  | 23.2   | 1539.7  | 40.8  | 1436.1  | 114.9  | -1.32 | 0.40 | <0,00001 |
| RAD54B  | 286.8   | 9.2    | 785.6   | 38.4   | 654.4   | 39.7  | 720.0   | 78.9   | 1.32  | 2.50 | <0,00001 |
| RALYL   | 87.0    | 5.6    | 37.7    | 1.7    | 38.3    | 1.7   | 38.0    | 1.6    | -1.19 | 0.44 | <0,00001 |
| RARRES2 | 7116.2  | 346.1  | 3391.7  | 519.2  | 2848.8  | 84.3  | 3120.3  | 450.4  | -1.18 | 0.44 | <0,00001 |
| RASA1   | 450.4   | 17.4   | 2420.8  | 249.6  | 809.8   | 40.2  | 1615.3  | 876.9  | 1.70  | 3.25 | 0.00002  |
| RASGRP3 | 458.0   | 7.0    | 108.5   | 4.3    | 49.0    | 3.2   | 78.7    | 32.0   | -2.44 | 0.18 | <0,00001 |
| RASL10A | 63.1    | 3.9    | 123.8   | 6.3    | 156.7   | 6.4   | 140.2   | 18.5   | 1.15  | 2.21 | <0,00001 |
| RASL11B | 3860.7  | 154.1  | 61.1    | 8.3    | 739.9   | 7.8   | 400.5   | 362.9  | -2.55 | 0.17 | 0.00006  |
| RAX     | 10776.1 | 836.5  | 68.9    | 5.8    | 216.2   | 16.2  | 142.6   | 79.5   | -5.77 | 0.02 | <0,00001 |
| RBBP8   | 1802.3  | 97.2   | 656.5   | 21.8   | 499.4   | 17.9  | 577.9   | 86.0   | -1.63 | 0.32 | <0,00001 |
| RBKS    | 284.5   | 15.7   | 892.6   | 97.3   | 821.6   | 22.5  | 857.1   | 75.6   | 1.59  | 3.01 | <0,00001 |
| RBM11   | 80.0    | 5.8    | 37.7    | 3.3    | 33.9    | 0.8   | 35.8    | 3.0    | -1.15 | 0.45 | <0,00001 |
| RBP1    | 5851.7  | 290.8  | 19144.9 | 2750.2 | 14978.9 | 738.9 | 17061.9 | 2904.2 | 1.53  | 2.89 | <0,00001 |
| RBP7    | 785.1   | 43.7   | 254.6   | 38.3   | 65.2    | 0.3   | 159.9   | 104.3  | -2.05 | 0.24 | 0.00001  |
| RBPMS2  | 160.0   | 11.7   | 94.2    | 11.5   | 48.5    | 2.8   | 71.3    | 25.7   | -1.13 | 0.46 | 0.00004  |
| RCAN1   | 1306.4  | 14.6   | 12599.7 | 282.2  | 5229.9  | 277.8 | 8914.8  | 3947.9 | 2.62  | 6.16 | <0,00001 |
| RCAN2   | 3769.1  | 90.4   | 1208.9  | 334.4  | 156.2   | 14.8  | 682.5   | 603.9  | -2.01 | 0.25 | 0.00077  |
| RCAN3   | 81.1    | 13.1   | 214.8   | 11.8   | 136.9   | 29.7  | 175.8   | 46.6   | 1.09  | 2.13 | 0.00001  |
| RDH13   | 1273.2  | 80.6   | 559.4   | 27.3   | 540.0   | 30.9  | 549.7   | 28.9   | -1.21 | 0.43 | <0,00001 |
| RELL1   | 1996.9  | 205.7  | 6919.1  | 351.1  | 5287.2  | 194.8 | 6103.2  | 911.1  | 1.60  | 3.03 | <0,00001 |
| RENBP   | 297.9   | 20.0   | 71.6    | 4.5    | 81.6    | 5.2   | 76.6    | 7.0    | -1.96 | 0.26 | <0,00001 |
| RFPL1S  | 48.3    | 1.6    | 88.6    | 5.1    | 238.1   | 13.2  | 163.4   | 80.5   | 1.65  | 3.13 | 0.00002  |
| RFTN1   | 18736.0 | 1114.8 | 5730.1  | 124.9  | 6966.0  | 304.6 | 6348.1  | 694.9  | -1.56 | 0.34 | <0,00001 |
| RGAG4   | 480.3   | 5.9    | 142.6   | 9.9    | 113.7   | 9.4   | 128.1   | 17.9   | -1.90 | 0.27 | <0,00001 |
| RGL4    | 32.0    | 1.1    | 258.6   | 138.0  | 32.6    | 1.7   | 145.6   | 150.8  | 1.71  | 3.28 | 0.00708  |
| RGS10   | 2751.2  | 186.1  | 9071.7  | 44.7   | 18810.0 | 320.6 | 13940.9 | 5209.7 | 2.25  | 4.76 | <0,00001 |
| RGS20   | 1201.8  | 18.7   | 362.3   | 33.1   | 796.5   | 44.7  | 579.4   | 234.9  | -1.01 | 0.50 | 0.00126  |
| RHCE    | 39.7    | 2.0    | 44.7    | 2.1    | 208.4   | 12.7  | 126.5   | 87.9   | 1.45  | 2.74 | 0.00600  |
| RHPN2   | 402.2   | 15.1   | 194.1   | 15.9   | 97.3    | 4.7   | 145.7   | 52.9   | -1.42 | 0.37 | <0,00001 |
| RIMKLA  | 827.8   | 28.5   | 145.1   | 24.6   | 358.8   | 18.0  | 251.9   | 115.9  | -1.62 | 0.32 | <0,00001 |
| RLBP1   | 262.3   | 40.2   | 54.7    | 2.0    | 47.8    | 4.4   | 51.3    | 4.9    | -2.35 | 0.20 | <0,00001 |
| RLN2    | 100.5   | 8.3    | 55.6    | 4.9    | 32.9    | 2.3   | 44.3    | 12.7   | -1.16 | 0.45 | <0,00001 |
| RNF122  | 1212.8  | 54.6   | 1746.8  | 39.1   | 6631.4  | 325.0 | 4189.1  | 2619.7 | 1.60  | 3.03 | 0.00049  |
| RNF150  | 268.6   | 26.4   | 645.4   | 33.1   | 469.6   | 45.4  | 557.5   | 100.9  | 1.04  | 2.06 | <0,00001 |
| RNF24   | 165.8   | 7.2    | 497.5   | 11.3   | 542.9   | 13.6  | 520.2   | 26.9   | 1.65  | 3.14 | <0,00001 |
| ROM1    | 1382.9  | 124.3  | 2778.9  | 115.7  | 3382.2  | 99.8  | 3080.6  | 337.6  | 1.15  | 2.22 | <0,00001 |

|          |         |        |         |        |         |        |         |        |        |       |          |
|----------|---------|--------|---------|--------|---------|--------|---------|--------|--------|-------|----------|
| RPP25    | 319.6   | 17.3   | 114.9   | 4.8    | 82.4    | 8.4    | 98.7    | 18.5   | -1.69  | 0.31  | <0,00001 |
| RPS4Y1   | 38570.1 | 1973.4 | 35.1    | 4.3    | 33.2    | 3.8    | 34.1    | 3.9    | -10.10 | 0.00  | <0,00001 |
| RPS4Y2   | 47580.2 | 870.1  | 38.0    | 1.6    | 36.4    | 1.7    | 37.2    | 1.7    | -10.30 | 0.00  | <0,00001 |
| RPS6KA1  | 1204.5  | 33.9   | 519.8   | 53.8   | 538.6   | 30.4   | 529.2   | 41.7   | -1.18  | 0.44  | <0,00001 |
| RPS6KA2  | 6053.9  | 760.5  | 1779.6  | 42.0   | 3602.6  | 382.1  | 2691.1  | 1006.4 | -1.13  | 0.46  | 0.00009  |
| RRAGD    | 561.4   | 25.2   | 46.0    | 2.2    | 126.5   | 6.0    | 86.3    | 43.3   | -2.54  | 0.17  | <0,00001 |
| RRN3P1   | 185.4   | 13.7   | 77.2    | 1.6    | 76.2    | 8.0    | 76.7    | 5.4    | -1.27  | 0.41  | <0,00001 |
| RUNDC3B  | 72.5    | 6.5    | 33.2    | 2.9    | 30.6    | 3.0    | 31.9    | 3.0    | -1.19  | 0.44  | <0,00001 |
| RUSC2    | 2302.1  | 66.1   | 8591.0  | 458.7  | 4472.3  | 207.5  | 6531.6  | 2226.1 | 1.46   | 2.74  | <0,00001 |
| SAA1     | 35.2    | 1.1    | 122.0   | 31.4   | 48.7    | 3.1    | 85.4    | 44.3   | 1.21   | 2.31  | 0.00237  |
| SAMD14   | 153.8   | 3.4    | 225.3   | 33.8   | 1126.6  | 22.5   | 676.0   | 482.5  | 1.83   | 3.56  | 0.00044  |
| SAMD5    | 88.9    | 6.7    | 46.7    | 1.7    | 39.1    | 2.0    | 42.9    | 4.4    | -1.05  | 0.48  | <0,00001 |
| SAMD9L   | 31.4    | 3.4    | 44.5    | 4.5    | 236.2   | 16.3   | 140.4   | 103.0  | 1.83   | 3.55  | 0.00084  |
| SCG2     | 307.2   | 12.1   | 144.7   | 11.7   | 9810.0  | 582.3  | 4977.3  | 5180.4 | 2.01   | 4.03  | 0.00887  |
| SCG5     | 5148.6  | 249.4  | 876.2   | 155.5  | 622.0   | 34.0   | 749.1   | 171.2  | -2.74  | 0.15  | <0,00001 |
| SDSL     | 899.2   | 285.9  | 1850.9  | 243.0  | 1909.3  | 127.9  | 1880.1  | 182.4  | 1.05   | 2.06  | <0,00001 |
| SELM     | 5935.5  | 367.9  | 10460.0 | 423.9  | 28269.4 | 1825.2 | 19364.7 | 9598.2 | 1.59   | 3.02  | 0.00001  |
| SELPLG   | 127.6   | 4.9    | 359.7   | 25.3   | 309.8   | 26.0   | 334.7   | 35.7   | 1.39   | 2.62  | <0,00001 |
| SEMA3C   | 1073.8  | 60.1   | 4053.0  | 312.7  | 3103.6  | 103.8  | 3578.3  | 551.4  | 1.72   | 3.30  | <0,00001 |
| SEMA5B   | 684.3   | 39.6   | 187.0   | 28.0   | 215.4   | 20.3   | 201.2   | 27.2   | -1.76  | 0.30  | <0,00001 |
| SEMA7A   | 31.9    | 3.9    | 78.3    | 7.9    | 70.6    | 3.2    | 74.5    | 6.9    | 1.22   | 2.32  | <0,00001 |
| SEPT11   | 488.9   | 24.7   | 1988.9  | 154.3  | 2191.1  | 178.3  | 2090.0  | 188.5  | 2.09   | 4.26  | <0,00001 |
| SEPT4    | 559.1   | 16.4   | 105.7   | 3.3    | 66.8    | 3.4    | 86.2    | 21.0   | -2.66  | 0.16  | <0,00001 |
| SEPT8    | 714.2   | 38.5   | 202.4   | 12.8   | 228.6   | 7.5    | 215.5   | 17.0   | -1.73  | 0.30  | <0,00001 |
| SERHL2   | 148.4   | 10.4   | 244.6   | 10.0   | 469.2   | 21.2   | 356.9   | 121.0  | 1.22   | 2.34  | <0,00001 |
| SERPINB7 | 44.5    | 1.0    | 1522.8  | 211.2  | 119.0   | 3.5    | 820.9   | 763.0  | 3.05   | 8.27  | <0,00001 |
| SERPINE1 | 2698.8  | 201.9  | 16692.8 | 1124.9 | 7861.5  | 697.9  | 12277.1 | 4799.4 | 2.09   | 4.27  | <0,00001 |
| SERPINE2 | 611.7   | 31.9   | 15520.1 | 3879.0 | 11049.0 | 1322.2 | 13284.6 | 3593.0 | 4.35   | 20.46 | <0,00001 |
| SERPINE3 | 315.6   | 100.0  | 37.0    | 3.1    | 32.8    | 1.1    | 34.9    | 3.1    | -3.12  | 0.11  | <0,00001 |
| SERPINF1 | 29647.2 | 1851.2 | 1426.0  | 21.3   | 12078.5 | 407.1  | 6752.3  | 5700.3 | -1.74  | 0.30  | 0.00459  |
| SERPINF2 | 119.8   | 6.5    | 43.1    | 2.4    | 47.4    | 1.6    | 45.2    | 3.0    | -1.41  | 0.38  | <0,00001 |
| SERPINI1 | 50.1    | 1.4    | 144.1   | 6.8    | 216.9   | 16.1   | 180.5   | 40.6   | 1.83   | 3.54  | <0,00001 |
| SFRP5    | 183.6   | 29.5   | 36.8    | 0.6    | 37.1    | 1.5    | 36.9    | 1.1    | -2.30  | 0.20  | <0,00001 |
| SFTPD    | 70.4    | 4.8    | 99.4    | 8.2    | 333.8   | 5.4    | 216.6   | 125.4  | 1.47   | 2.78  | 0.00088  |
| SGCE     | 2193.6  | 89.5   | 3058.4  | 342.0  | 6744.9  | 331.0  | 4901.7  | 1995.0 | 1.11   | 2.15  | 0.00041  |
| SGK1     | 4896.1  | 115.3  | 15844.8 | 1790.9 | 16453.9 | 1141.4 | 16149.3 | 1427.9 | 1.72   | 3.29  | <0,00001 |
| SGMS1    | 605.1   | 22.6   | 1363.4  | 46.5   | 1741.7  | 54.2   | 1552.6  | 207.5  | 1.35   | 2.55  | <0,00001 |
| SH2D4A   | 99.0    | 6.7    | 262.6   | 29.1   | 170.8   | 10.1   | 216.7   | 53.0   | 1.11   | 2.16  | <0,00001 |
| SH3BGRL3 | 4567.4  | 206.0  | 9249.6  | 709.4  | 13446.6 | 182.9  | 11348.1 | 2294.1 | 1.30   | 2.46  | <0,00001 |
| SH3RF3   | 209.5   | 15.7   | 31.8    | 1.4    | 37.0    | 3.4    | 34.4    | 3.7    | -2.60  | 0.17  | <0,00001 |
| SHROOM1  | 272.9   | 10.8   | 848.7   | 18.7   | 969.6   | 66.9   | 909.1   | 79.0   | 1.73   | 3.33  | <0,00001 |
| SIPA1L2  | 1785.5  | 190.4  | 133.1   | 8.7    | 176.6   | 4.5    | 154.9   | 24.1   | -3.51  | 0.09  | <0,00001 |
| SIX1     | 43.9    | 2.1    | 118.1   | 6.7    | 632.5   | 55.7   | 375.3   | 277.4  | 2.62   | 6.17  | <0,00001 |

|           |         |        |         |       |         |       |         |        |       |       |          |
|-----------|---------|--------|---------|-------|---------|-------|---------|--------|-------|-------|----------|
| SLC10A3   | 4096.1  | 248.7  | 7580.5  | 289.1 | 9342.8  | 131.8 | 8461.7  | 964.6  | 1.04  | 2.06  | <0,00001 |
| SLC10A4   | 128.3   | 11.2   | 54.1    | 1.7   | 49.4    | 4.3   | 51.8    | 3.9    | -1.30 | 0.40  | <0,00001 |
| SLC16A8   | 732.2   | 109.8  | 153.7   | 11.4  | 117.0   | 7.7   | 135.4   | 21.6   | -2.41 | 0.19  | <0,00001 |
| SLC17A5   | 374.4   | 36.6   | 970.7   | 57.6  | 892.5   | 91.0  | 931.6   | 82.0   | 1.31  | 2.48  | <0,00001 |
| SLC1A5    | 1057.9  | 95.5   | 389.8   | 23.8  | 455.5   | 16.5  | 422.6   | 39.9   | -1.32 | 0.40  | <0,00001 |
| SLC22A4   | 107.2   | 8.1    | 320.2   | 23.0  | 378.4   | 37.8  | 349.3   | 42.5   | 1.70  | 3.24  | <0,00001 |
| SLC25A6   | 19912.4 | 1121.5 | 10981.4 | 518.3 | 6554.1  | 229.6 | 8767.7  | 2395.4 | -1.16 | 0.45  | <0,00001 |
| SLC26A11  | 8487.1  | 520.3  | 3919.9  | 127.3 | 4210.6  | 231.8 | 4065.3  | 232.6  | -1.06 | 0.48  | <0,00001 |
| SLC2A14   | 247.7   | 13.5   | 1098.8  | 72.1  | 886.9   | 60.3  | 992.9   | 128.9  | 1.99  | 3.98  | <0,00001 |
| SLC30A10  | 420.0   | 44.5   | 105.5   | 5.0   | 214.3   | 18.8  | 159.9   | 59.5   | -1.35 | 0.39  | <0,00001 |
| SLC31A2   | 888.2   | 53.8   | 3364.3  | 290.7 | 1345.1  | 71.4  | 2354.7  | 1096.9 | 1.33  | 2.51  | 0.00018  |
| SLC35F3   | 55.0    | 3.8    | 1090.9  | 18.2  | 132.6   | 5.4   | 611.7   | 512.4  | 2.74  | 6.69  | <0,00001 |
| SLC35G1   | 1074.9  | 38.0   | 186.4   | 10.3  | 155.2   | 8.4   | 170.8   | 18.8   | -2.65 | 0.16  | <0,00001 |
| SLC37A1   | 123.3   | 7.1    | 49.0    | 1.2   | 31.7    | 1.9   | 40.4    | 9.3    | -1.60 | 0.33  | <0,00001 |
| SLC39A9   | 138.3   | 16.7   | 212.5   | 11.2  | 390.9   | 17.7  | 301.7   | 96.3   | 1.09  | 2.13  | 0.00003  |
| SLC3A1    | 244.3   | 22.2   | 52.7    | 2.0   | 61.0    | 3.5   | 56.9    | 5.2    | -2.09 | 0.23  | <0,00001 |
| SLC43A3   | 163.7   | 7.3    | 32.7    | 1.0   | 34.2    | 1.7   | 33.4    | 1.5    | -2.30 | 0.20  | <0,00001 |
| SLC45A2   | 565.2   | 41.8   | 83.0    | 5.6   | 114.9   | 3.4   | 99.0    | 17.5   | -2.50 | 0.18  | <0,00001 |
| SLC5A3    | 180.6   | 7.0    | 72.8    | 5.8   | 105.0   | 8.0   | 88.9    | 18.4   | -1.02 | 0.49  | <0,00001 |
| SLC5A8    | 89.8    | 5.8    | 34.4    | 0.7   | 47.5    | 3.8   | 41.0    | 7.5    | -1.14 | 0.45  | <0,00001 |
| SLC7A8    | 2370.5  | 137.5  | 77.8    | 19.6  | 83.6    | 4.7   | 80.7    | 13.6   | -4.85 | 0.03  | <0,00001 |
| SLC9A7    | 122.6   | 11.3   | 275.9   | 10.0  | 374.2   | 40.8  | 325.1   | 59.3   | 1.39  | 2.63  | <0,00001 |
| SLC9B2    | 390.7   | 19.4   | 200.8   | 11.5  | 143.5   | 4.1   | 172.2   | 31.7   | -1.17 | 0.44  | <0,00001 |
| SLITRK6   | 95.8    | 8.1    | 6614.7  | 688.4 | 3947.0  | 453.8 | 5280.8  | 1524.7 | 5.63  | 49.46 | <0,00001 |
| SMAD6     | 2212.9  | 137.5  | 580.1   | 74.4  | 669.5   | 47.0  | 624.8   | 74.9   | -1.82 | 0.28  | <0,00001 |
| SMIM10L2B | 6407.8  | 176.2  | 858.5   | 83.1  | 1542.5  | 152.3 | 1200.5  | 382.8  | -2.35 | 0.20  | <0,00001 |
| SMIM3     | 2826.0  | 200.3  | 5688.4  | 581.6 | 16156.8 | 838.7 | 10922.6 | 5635.3 | 1.81  | 3.50  | <0,00001 |
| SMPD1     | 1526.7  | 111.8  | 3665.9  | 285.9 | 3631.5  | 287.5 | 3648.7  | 266.1  | 1.25  | 2.38  | <0,00001 |
| SMPDL3B   | 886.8   | 59.1   | 346.3   | 26.2  | 92.1    | 4.4   | 219.2   | 137.0  | -1.81 | 0.28  | 0.00007  |
| SMPX      | 161.2   | 12.2   | 32.9    | 1.8   | 34.1    | 3.0   | 33.5    | 2.4    | -2.27 | 0.21  | <0,00001 |
| SMTN      | 1173.2  | 86.2   | 3049.7  | 206.6 | 2347.6  | 407.9 | 2698.7  | 480.1  | 1.19  | 2.28  | <0,00001 |
| SNAI1     | 275.5   | 19.6   | 691.1   | 60.6  | 3560.1  | 201.3 | 2125.6  | 1539.7 | 2.52  | 5.73  | <0,00001 |
| SNAI3-AS1 | 645.1   | 18.3   | 1087.7  | 19.9  | 1742.1  | 26.1  | 1414.9  | 350.5  | 1.11  | 2.16  | <0,00001 |
| SNAP91    | 108.8   | 0.6    | 33.1    | 1.9   | 39.3    | 2.9   | 36.2    | 4.0    | -1.59 | 0.33  | <0,00001 |
| SNHG15    | 3971.6  | 134.3  | 1612.6  | 94.5  | 1907.9  | 113.4 | 1760.2  | 185.1  | -1.17 | 0.44  | <0,00001 |
| SNX7      | 2748.2  | 90.4   | 6555.1  | 262.6 | 5835.7  | 163.3 | 6195.4  | 434.6  | 1.17  | 2.25  | <0,00001 |
| SOBP      | 196.3   | 19.8   | 457.4   | 11.8  | 455.6   | 9.8   | 456.5   | 10.1   | 1.22  | 2.33  | <0,00001 |
| SORL1     | 1030.6  | 123.3  | 389.7   | 81.3  | 428.4   | 32.1  | 409.1   | 60.9   | -1.32 | 0.40  | <0,00001 |
| SOSTDC1   | 245.2   | 9.0    | 34.7    | 0.9   | 73.1    | 3.7   | 53.9    | 20.7   | -2.12 | 0.23  | <0,00001 |
| SOX9      | 440.7   | 61.3   | 1814.5  | 69.6  | 1042.1  | 70.8  | 1428.3  | 418.0  | 1.65  | 3.15  | <0,00001 |
| SOX9-AS1  | 42.8    | 3.9    | 157.2   | 19.1  | 221.7   | 16.0  | 189.5   | 38.1   | 2.12  | 4.35  | <0,00001 |
| SPATA13   | 57.0    | 9.3    | 103.0   | 7.1   | 168.2   | 37.2  | 135.6   | 42.7   | 1.22  | 2.34  | <0,00001 |
| SPHK1     | 3307.7  | 222.3  | 1868.5  | 82.9  | 1372.0  | 69.9  | 1620.2  | 274.7  | -1.02 | 0.49  | <0,00001 |

|           |         |        |         |        |         |        |         |         |       |       |          |
|-----------|---------|--------|---------|--------|---------|--------|---------|---------|-------|-------|----------|
| SPINT1    | 1155.7  | 134.8  | 69.6    | 12.2   | 53.3    | 3.6    | 61.4    | 12.0    | -4.20 | 0.05  | <0,00001 |
| SPINT2    | 24975.9 | 1014.0 | 13229.5 | 712.2  | 4522.9  | 83.3   | 8876.2  | 4677.5  | -1.38 | 0.38  | 0.00050  |
| SPNS3     | 323.4   | 15.8   | 105.7   | 5.4    | 74.1    | 4.4    | 89.9    | 17.5    | -1.83 | 0.28  | <0,00001 |
| SPOCK1    | 1548.1  | 49.5   | 4492.5  | 367.8  | 10922.9 | 414.4  | 7707.7  | 3456.3  | 2.19  | 4.56  | <0,00001 |
| SPON2     | 10768.1 | 929.2  | 51.0    | 3.3    | 1433.3  | 71.2   | 742.2   | 740.4   | -2.72 | 0.15  | 0.00009  |
| SPRY1     | 61.0    | 3.6    | 144.3   | 13.9   | 599.7   | 9.8    | 372.0   | 243.7   | 2.30  | 4.91  | <0,00001 |
| SPRY2     | 752.2   | 49.2   | 3147.7  | 101.4  | 3773.4  | 84.6   | 3460.6  | 345.4   | 2.19  | 4.57  | <0,00001 |
| SQRDL     | 4212.7  | 189.2  | 9395.3  | 1172.5 | 8469.5  | 472.0  | 8932.4  | 964.1   | 1.08  | 2.11  | <0,00001 |
| SRD5A3    | 1017.8  | 89.7   | 2225.6  | 66.6   | 2199.5  | 162.8  | 2212.6  | 116.0   | 1.12  | 2.17  | <0,00001 |
| SRPX2     | 95.3    | 6.1    | 1981.5  | 272.4  | 2853.5  | 116.7  | 2417.5  | 504.9   | 4.60  | 24.17 | <0,00001 |
| SRRM4     | 78.4    | 25.5   | 36.9    | 1.3    | 36.7    | 2.4    | 36.8    | 1.8     | -1.06 | 0.48  | <0,00001 |
| SSC4D     | 3237.5  | 176.5  | 281.8   | 5.3    | 308.8   | 79.6   | 295.3   | 54.2    | -3.42 | 0.09  | <0,00001 |
| SSC5D     | 106.6   | 12.2   | 432.6   | 108.6  | 542.2   | 136.3  | 487.4   | 128.2   | 2.15  | 4.44  | <0,00001 |
| SSPN      | 911.9   | 64.7   | 4257.2  | 570.1  | 1912.9  | 37.3   | 3085.1  | 1307.7  | 1.68  | 3.19  | <0,00001 |
| SST       | 2215.3  | 177.0  | 35.7    | 1.1    | 36.0    | 1.8    | 35.9    | 1.4     | -5.92 | 0.02  | <0,00001 |
| SSUH2     | 166.4   | 7.6    | 39.5    | 1.8    | 47.1    | 1.8    | 43.3    | 4.4     | -1.94 | 0.26  | <0,00001 |
| ST6GALNAC | 2634.4  | 131.2  | 321.6   | 29.6   | 569.3   | 30.8   | 445.4   | 135.3   | -2.50 | 0.18  | <0,00001 |
| ST6GALNAC | 353.3   | 7.9    | 66.2    | 4.0    | 33.2    | 1.0    | 49.7    | 17.8    | -2.75 | 0.15  | <0,00001 |
| ST8SIA1   | 122.5   | 7.6    | 209.7   | 42.4   | 293.5   | 19.3   | 251.6   | 54.2    | 1.03  | 2.04  | <0,00001 |
| STAP2     | 696.5   | 26.9   | 161.6   | 10.1   | 171.6   | 14.5   | 166.6   | 12.8    | -2.06 | 0.24  | <0,00001 |
| STEAP2    | 43.6    | 1.1    | 134.2   | 7.5    | 54.4    | 2.1    | 94.3    | 43.0    | 1.06  | 2.09  | 0.00465  |
| STK26     | 9240.3  | 1081.4 | 2916.3  | 196.4  | 876.7   | 59.3   | 1896.5  | 1098.5  | -2.08 | 0.24  | <0,00001 |
| STRA6     | 82.1    | 7.7    | 296.2   | 85.1   | 536.3   | 41.3   | 416.3   | 142.5   | 2.25  | 4.76  | <0,00001 |
| STX11     | 308.7   | 22.0   | 188.0   | 23.2   | 58.8    | 4.4    | 123.4   | 70.8    | -1.21 | 0.43  | 0.00528  |
| SULF1     | 6103.8  | 410.1  | 83428.3 | 9571.8 | 28100.2 | 2127.6 | 55764.3 | 30262.8 | 2.94  | 7.68  | <0,00001 |
| SULF2     | 12718.0 | 718.5  | 17172.0 | 535.8  | 44821.0 | 1788.9 | 30996.5 | 14829.5 | 1.21  | 2.31  | 0.00089  |
| SVIL      | 86.0    | 3.5    | 249.6   | 32.9   | 692.2   | 83.4   | 470.9   | 243.8   | 2.27  | 4.83  | <0,00001 |
| SVILP1    | 40.4    | 1.9    | 82.9    | 10.0   | 165.6   | 11.3   | 124.2   | 45.3    | 1.56  | 2.96  | <0,00001 |
| SYNC      | 1814.5  | 50.2   | 5050.1  | 337.4  | 2880.7  | 193.8  | 3965.4  | 1187.2  | 1.10  | 2.14  | <0,00001 |
| SYT1      | 483.9   | 119.5  | 155.0   | 19.6   | 213.6   | 57.5   | 184.3   | 50.6    | -1.36 | 0.39  | <0,00001 |
| SYT14     | 368.9   | 10.9   | 60.8    | 3.3    | 92.0    | 6.3    | 76.4    | 17.3    | -2.25 | 0.21  | <0,00001 |
| SYT17     | 1677.7  | 102.5  | 147.0   | 10.6   | 853.7   | 52.4   | 500.4   | 379.4   | -1.49 | 0.36  | 0.00773  |
| TBC1D10A  | 2131.8  | 34.5   | 4202.5  | 272.2  | 4407.8  | 298.5  | 4305.2  | 286.3   | 1.01  | 2.02  | <0,00001 |
| TBC1D19   | 481.8   | 30.3   | 843.3   | 27.1   | 1449.5  | 175.5  | 1146.4  | 344.2   | 1.22  | 2.33  | <0,00001 |
| TBC1D4    | 40.1    | 3.2    | 237.2   | 8.1    | 63.3    | 2.7    | 150.2   | 93.1    | 1.71  | 3.28  | 0.00029  |
| TBL1X     | 779.8   | 22.4   | 343.0   | 10.1   | 289.5   | 7.9    | 316.3   | 29.8    | -1.30 | 0.41  | <0,00001 |
| TC2N      | 238.1   | 14.3   | 67.8    | 5.8    | 35.4    | 2.0    | 51.6    | 17.8    | -2.15 | 0.23  | <0,00001 |
| TCEAL2    | 1016.2  | 70.8   | 304.8   | 27.8   | 253.7   | 25.9   | 279.3   | 36.9    | -1.85 | 0.28  | <0,00001 |
| TCIRG1    | 9356.1  | 867.1  | 1787.7  | 206.3  | 3613.8  | 188.3  | 2700.8  | 993.1   | -1.73 | 0.30  | <0,00001 |
| TCP11L1   | 303.7   | 9.0    | 725.9   | 46.8   | 1042.3  | 88.4   | 884.1   | 181.4   | 1.52  | 2.87  | <0,00001 |
| TDO2      | 37.7    | 0.5    | 41.6    | 1.5    | 359.3   | 24.4   | 200.5   | 170.6   | 1.90  | 3.73  | 0.00220  |
| TDRD9     | 81.1    | 2.4    | 38.0    | 2.4    | 4002.1  | 232.4  | 2020.1  | 2124.4  | 2.05  | 4.15  | 0.00795  |
| TEKT4     | 33.9    | 3.2    | 118.6   | 4.4    | 196.4   | 20.1   | 157.5   | 43.7    | 2.17  | 4.50  | <0,00001 |

|           |          |        |          |         |          |         |          |         |       |      |          |
|-----------|----------|--------|----------|---------|----------|---------|----------|---------|-------|------|----------|
| TEKT5     | 145.0    | 8.4    | 57.7     | 4.0     | 63.0     | 3.9     | 60.3     | 4.6     | -1.26 | 0.42 | <0,00001 |
| TESC      | 55.8     | 3.5    | 221.7    | 16.8    | 240.8    | 20.3    | 231.3    | 20.0    | 2.05  | 4.13 | <0,00001 |
| TFEB      | 687.7    | 17.8   | 1405.0   | 82.3    | 2840.7   | 77.3    | 2122.9   | 771.0   | 1.57  | 2.96 | <0,00001 |
| TFRC      | 9910.3   | 439.1  | 3321.9   | 136.5   | 5141.3   | 241.2   | 4231.6   | 989.3   | -1.21 | 0.43 | <0,00001 |
| TG        | 47.2     | 1.5    | 115.2    | 5.1     | 168.3    | 8.3     | 141.8    | 29.1    | 1.57  | 2.97 | <0,00001 |
| TGFA      | 36.5     | 2.6    | 129.8    | 20.7    | 137.4    | 9.4     | 133.6    | 15.4    | 1.87  | 3.66 | <0,00001 |
| TGFB1     | 114498.5 | 6315.0 | 167939.3 | 21323.7 | 319800.3 | 12188.2 | 243869.8 | 82750.3 | 1.05  | 2.08 | 0.00007  |
| TGIF1     | 1693.7   | 62.5   | 772.7    | 77.9    | 360.1    | 8.4     | 566.4    | 226.5   | -1.51 | 0.35 | <0,00001 |
| THBD      | 3129.7   | 416.3  | 97.3     | 21.7    | 37.5     | 2.2     | 67.4     | 35.0    | -5.20 | 0.03 | <0,00001 |
| THNSL2    | 162.0    | 7.5    | 425.6    | 12.2    | 1466.8   | 65.2    | 946.2    | 558.2   | 2.30  | 4.94 | <0,00001 |
| THOC3     | 20502.2  | 949.0  | 5413.9   | 477.1   | 5056.6   | 131.6   | 5235.3   | 376.1   | -1.97 | 0.26 | <0,00001 |
| THSD1     | 2117.8   | 76.1   | 4276.2   | 543.6   | 5429.5   | 138.8   | 4852.9   | 717.6   | 1.19  | 2.28 | <0,00001 |
| THY1      | 3777.1   | 243.1  | 15406.3  | 1774.5  | 10549.6  | 791.8   | 12977.9  | 2890.9  | 1.75  | 3.37 | <0,00001 |
| TIGD2     | 2668.0   | 143.7  | 874.6    | 45.9    | 748.0    | 59.5    | 811.3    | 83.7    | -1.71 | 0.31 | <0,00001 |
| TIMP2     | 26541.0  | 651.3  | 9780.9   | 570.0   | 14873.2  | 257.1   | 12327.1  | 2752.5  | -1.09 | 0.47 | <0,00001 |
| TIPARP    | 4372.3   | 378.0  | 12424.8  | 797.4   | 6238.4   | 155.8   | 9331.6   | 3349.3  | 1.06  | 2.08 | 0.00018  |
| TIPIN     | 754.0    | 25.4   | 2446.0   | 161.5   | 1216.1   | 39.5    | 1831.0   | 666.4   | 1.23  | 2.35 | 0.00001  |
| TK1       | 225.8    | 14.8   | 654.9    | 156.0   | 1000.8   | 31.9    | 827.8    | 212.2   | 1.83  | 3.56 | <0,00001 |
| TKT       | 57518.0  | 1233.0 | 22702.1  | 579.8   | 32908.2  | 1084.4  | 27805.1  | 5514.5  | -1.04 | 0.49 | <0,00001 |
| TLR1      | 33.1     | 1.8    | 127.0    | 11.9    | 71.9     | 1.6     | 99.5     | 30.5    | 1.54  | 2.90 | <0,00001 |
| TMCO4     | 205.8    | 9.4    | 578.7    | 50.6    | 430.3    | 21.6    | 504.5    | 87.1    | 1.28  | 2.43 | <0,00001 |
| TMEFF1    | 301.4    | 17.1   | 118.3    | 3.8     | 119.5    | 6.2     | 118.9    | 4.8     | -1.34 | 0.39 | <0,00001 |
| TMEM117   | 2180.0   | 14.9   | 584.0    | 72.7    | 885.0    | 21.6    | 734.5    | 168.4   | -1.55 | 0.34 | <0,00001 |
| TMEM125   | 811.8    | 19.0   | 93.6     | 9.0     | 58.0     | 4.4     | 75.8     | 20.2    | -3.37 | 0.10 | <0,00001 |
| TMEM130   | 1850.5   | 84.2   | 419.6    | 31.9    | 424.2    | 35.5    | 421.9    | 31.3    | -2.13 | 0.23 | <0,00001 |
| TMEM154   | 40.3     | 4.1    | 176.3    | 34.7    | 58.5     | 3.7     | 117.4    | 67.0    | 1.41  | 2.66 | 0.00118  |
| TMEM161B- | 74.1     | 8.4    | 214.2    | 10.7    | 754.2    | 54.7    | 484.2    | 290.9   | 2.44  | 5.43 | <0,00001 |
| TMEM17    | 178.7    | 10.2   | 357.2    | 22.0    | 425.5    | 11.2    | 391.3    | 40.0    | 1.13  | 2.18 | <0,00001 |
| TMEM171   | 50.0     | 2.5    | 148.7    | 11.2    | 171.0    | 12.7    | 159.8    | 16.3    | 1.67  | 3.19 | <0,00001 |
| TMEM187   | 912.6    | 39.4   | 2136.6   | 85.4    | 1674.5   | 86.3    | 1905.6   | 259.5   | 1.06  | 2.08 | <0,00001 |
| TMEM229A  | 203.0    | 16.4   | 36.6     | 2.3     | 36.7     | 2.0     | 36.7     | 2.0     | -2.46 | 0.18 | <0,00001 |
| TMEM251   | 621.9    | 21.4   | 298.3    | 6.6     | 274.2    | 13.0    | 286.2    | 16.1    | -1.12 | 0.46 | <0,00001 |
| TMEM45B   | 80.3     | 3.3    | 34.9     | 1.5     | 32.2     | 1.9     | 33.6     | 2.2     | -1.25 | 0.42 | <0,00001 |
| TMEM47    | 1092.6   | 50.4   | 2585.4   | 174.0   | 1859.5   | 99.8    | 2222.4   | 409.7   | 1.01  | 2.02 | <0,00001 |
| TMEM51    | 249.1    | 46.9   | 823.3    | 63.5    | 662.2    | 40.3    | 742.7    | 99.2    | 1.56  | 2.96 | <0,00001 |
| TMEM54    | 270.1    | 26.3   | 1322.7   | 59.7    | 562.1    | 35.7    | 942.4    | 409.1   | 1.71  | 3.27 | <0,00001 |
| TMEM74B   | 252.6    | 33.7   | 108.8    | 9.1     | 128.3    | 19.4    | 118.6    | 17.5    | -1.08 | 0.47 | <0,00001 |
| TMEM88    | 3373.3   | 225.1  | 1357.2   | 139.0   | 720.2    | 42.5    | 1038.7   | 353.5   | -1.64 | 0.32 | <0,00001 |
| TNFAIP2   | 293.6    | 53.6   | 2289.1   | 42.5    | 335.3    | 32.0    | 1312.2   | 1044.9  | 1.77  | 3.41 | 0.00238  |
| TNFAIP6   | 45.2     | 4.9    | 77.8     | 6.6     | 2314.5   | 178.3   | 1196.1   | 1201.2  | 2.90  | 7.47 | 0.00003  |
| TNFRSF10C | 2365.0   | 58.7   | 42.6     | 1.0     | 34.0     | 2.3     | 38.3     | 4.9     | -5.93 | 0.02 | <0,00001 |
| TNFRSF14  | 8366.5   | 937.7  | 2396.7   | 112.5   | 2599.9   | 380.2   | 2498.3   | 281.4   | -1.73 | 0.30 | <0,00001 |
| TNFSF12   | 1552.8   | 59.4   | 3722.6   | 334.1   | 2963.4   | 207.7   | 3343.0   | 480.7   | 1.10  | 2.14 | <0,00001 |

|          |         |        |        |       |         |       |        |        |       |      |          |
|----------|---------|--------|--------|-------|---------|-------|--------|--------|-------|------|----------|
| TNFSF13  | 116.2   | 4.0    | 235.3  | 7.9   | 286.3   | 28.9  | 260.8  | 33.6   | 1.16  | 2.23 | <0,00001 |
| TNFSF4   | 47.9    | 1.9    | 90.5   | 3.0   | 121.2   | 5.4   | 105.9  | 16.9   | 1.13  | 2.19 | <0,00001 |
| TNIK     | 766.7   | 46.6   | 298.8  | 8.9   | 317.8   | 18.5  | 308.3  | 16.8   | -1.31 | 0.40 | <0,00001 |
| TNNC1    | 2038.6  | 100.1  | 69.2   | 6.6   | 70.2    | 2.6   | 69.7   | 4.7    | -4.87 | 0.03 | <0,00001 |
| TNNT1    | 331.2   | 20.4   | 5004.5 | 274.9 | 1102.5  | 61.3  | 3053.5 | 2093.9 | 2.79  | 6.90 | <0,00001 |
| TOP3B    | 711.4   | 65.3   | 356.5  | 21.5  | 322.7   | 30.9  | 339.6  | 30.6   | -1.06 | 0.48 | <0,00001 |
| TP53INP1 | 17520.8 | 1109.3 | 7507.8 | 304.1 | 9428.9  | 351.7 | 8468.4 | 1071.0 | -1.04 | 0.49 | <0,00001 |
| TPBG     | 528.7   | 29.0   | 2760.1 | 145.2 | 697.5   | 20.9  | 1728.8 | 1106.7 | 1.52  | 2.87 | 0.00137  |
| TPP1     | 1479.6  | 96.5   | 588.2  | 12.4  | 869.0   | 55.3  | 728.6  | 154.6  | -1.01 | 0.50 | <0,00001 |
| TPRG1L   | 1109.0  | 51.2   | 2901.7 | 198.9 | 2005.5  | 57.3  | 2453.6 | 497.8  | 1.13  | 2.19 | <0,00001 |
| TPRN     | 2237.0  | 74.2   | 766.4  | 32.6  | 382.8   | 12.8  | 574.6  | 206.3  | -1.89 | 0.27 | <0,00001 |
| TREM1    | 32.4    | 0.7    | 85.9   | 9.4   | 134.5   | 9.8   | 110.2  | 27.4   | 1.73  | 3.31 | <0,00001 |
| TRIM47   | 2537.5  | 47.8   | 1001.9 | 136.4 | 328.4   | 10.0  | 665.2  | 371.0  | -1.78 | 0.29 | 0.00001  |
| TRIM50   | 284.0   | 27.4   | 89.2   | 8.4   | 106.4   | 5.2   | 97.8   | 11.3   | -1.53 | 0.35 | <0,00001 |
| TRIM55   | 44.1    | 1.2    | 58.2   | 7.1   | 273.9   | 15.1  | 166.0  | 115.8  | 1.66  | 3.16 | 0.00151  |
| TRIM63   | 212.2   | 25.6   | 43.1   | 3.2   | 35.5    | 2.8   | 39.3   | 4.9    | -2.42 | 0.19 | <0,00001 |
| TRIM74   | 358.6   | 44.5   | 101.2  | 3.1   | 178.6   | 7.6   | 139.9  | 41.7   | -1.33 | 0.40 | <0,00001 |
| TRPC4    | 1955.3  | 57.4   | 44.3   | 2.1   | 551.2   | 26.0  | 297.8  | 271.5  | -2.10 | 0.23 | 0.00116  |
| TRPM4    | 225.6   | 5.1    | 426.5  | 15.6  | 763.5   | 22.5  | 595.0  | 181.0  | 1.36  | 2.57 | <0,00001 |
| TRPV2    | 1520.0  | 143.8  | 84.5   | 10.3  | 85.6    | 8.7   | 85.0   | 8.8    | -4.14 | 0.06 | <0,00001 |
| TSEN2    | 1616.4  | 91.6   | 812.7  | 32.1  | 533.7   | 25.5  | 673.2  | 151.6  | -1.24 | 0.42 | <0,00001 |
| TSHZ3    | 428.1   | 6.2    | 1384.4 | 83.6  | 2404.8  | 157.0 | 1894.6 | 557.8  | 2.09  | 4.27 | <0,00001 |
| TSPAN11  | 2191.5  | 194.0  | 50.3   | 1.2   | 166.7   | 3.9   | 108.5  | 62.3   | -3.99 | 0.06 | <0,00001 |
| TSPAN13  | 957.8   | 68.3   | 5652.3 | 930.2 | 2039.9  | 119.5 | 3846.1 | 2026.1 | 1.86  | 3.64 | <0,00001 |
| TTLL4    | 566.2   | 39.3   | 272.9  | 12.0  | 233.6   | 16.5  | 253.3  | 24.9   | -1.16 | 0.45 | <0,00001 |
| TTR      | 111.8   | 57.3   | 33.7   | 1.2   | 42.0    | 2.9   | 37.8   | 4.9    | -1.50 | 0.35 | <0,00001 |
| TTY15    | 316.0   | 23.6   | 30.9   | 1.4   | 30.7    | 0.8   | 30.8   | 1.1    | -3.35 | 0.10 | <0,00001 |
| TTYH3    | 7089.5  | 367.1  | 2815.8 | 222.8 | 3085.1  | 345.8 | 2950.4 | 305.4  | -1.26 | 0.42 | <0,00001 |
| TUBB2B   | 1327.7  | 70.9   | 60.7   | 2.6   | 62.1    | 1.9   | 61.4   | 2.2    | -4.43 | 0.05 | <0,00001 |
| TWIST2   | 38.4    | 4.3    | 539.6  | 58.4  | 282.9   | 5.2   | 411.2  | 142.5  | 3.29  | 9.76 | <0,00001 |
| TXNDC15  | 3710.1  | 190.6  | 5072.6 | 306.6 | 12820.8 | 533.5 | 8946.7 | 4161.1 | 1.19  | 2.29 | 0.00073  |
| TYMS     | 3276.9  | 228.9  | 882.8  | 43.5  | 1617.6  | 419.2 | 1250.2 | 480.0  | -1.34 | 0.39 | <0,00001 |
| TYMSOS   | 364.4   | 20.5   | 135.2  | 6.0   | 158.6   | 15.5  | 146.9  | 16.6   | -1.31 | 0.40 | <0,00001 |
| TYRP1    | 15548.3 | 414.9  | 86.1   | 3.6   | 458.7   | 31.8  | 272.4  | 200.3  | -5.06 | 0.03 | <0,00001 |
| UAP1     | 1644.5  | 111.1  | 6904.5 | 325.9 | 2770.8  | 183.8 | 4837.7 | 2223.1 | 1.47  | 2.77 | 0.00002  |
| UAP1L1   | 1179.4  | 42.9   | 491.5  | 25.5  | 558.6   | 27.5  | 525.1  | 43.5   | -1.17 | 0.45 | <0,00001 |
| UBE2C    | 88.5    | 4.5    | 155.9  | 25.7  | 2295.4  | 167.9 | 1225.7 | 1149.0 | 2.70  | 6.50 | 0.00004  |
| UBTD1    | 2188.9  | 96.3   | 5808.8 | 129.4 | 4794.5  | 260.7 | 5301.6 | 574.7  | 1.27  | 2.41 | <0,00001 |
| UCP2     | 894.7   | 75.0   | 330.8  | 52.5  | 389.0   | 43.2  | 359.9  | 54.3   | -1.30 | 0.40 | <0,00001 |
| UNC5D    | 640.9   | 21.0   | 34.6   | 2.2   | 35.5    | 2.2   | 35.0   | 2.1    | -4.19 | 0.05 | <0,00001 |
| UQC3     | 1417.8  | 122.6  | 5234.7 | 103.7 | 3348.8  | 138.0 | 4291.7 | 1014.4 | 1.57  | 2.97 | <0,00001 |
| USP9Y    | 80.2    | 8.3    | 30.9   | 1.9   | 30.5    | 1.8   | 30.7   | 1.7    | -1.39 | 0.38 | <0,00001 |
| UST      | 65.3    | 1.7    | 314.4  | 6.2   | 129.5   | 10.4  | 221.9  | 99.1   | 1.67  | 3.18 | <0,00001 |



|           |         |       |         |       |        |       |        |        |       |       |          |
|-----------|---------|-------|---------|-------|--------|-------|--------|--------|-------|-------|----------|
| VAMP5     | 1780.8  | 87.8  | 3102.3  | 55.6  | 4267.2 | 150.4 | 3684.8 | 631.5  | 1.04  | 2.05  | <0,00001 |
| VAT1L     | 982.5   | 73.3  | 119.4   | 17.9  | 35.5   | 2.7   | 77.5   | 46.4   | -3.35 | 0.10  | <0,00001 |
| VDR       | 681.2   | 17.1  | 5615.5  | 464.1 | 2153.7 | 99.7  | 3884.6 | 1876.3 | 2.35  | 5.12  | <0,00001 |
| VEGFC     | 662.0   | 10.8  | 3360.9  | 91.3  | 3744.4 | 92.4  | 3552.6 | 221.9  | 2.42  | 5.35  | <0,00001 |
| VEZT      | 1135.9  | 72.2  | 2332.0  | 45.0  | 2428.1 | 89.0  | 2380.0 | 83.1   | 1.07  | 2.09  | <0,00001 |
| VLDLR-AS1 | 210.2   | 9.7   | 84.5    | 3.0   | 69.5   | 2.1   | 77.0   | 8.3    | -1.45 | 0.37  | <0,00001 |
| VPS36     | 542.8   | 39.6  | 1090.6  | 63.3  | 1182.9 | 58.4  | 1136.7 | 74.9   | 1.06  | 2.09  | <0,00001 |
| VSTM2L    | 158.6   | 6.5   | 795.0   | 81.0  | 740.6  | 36.0  | 767.8  | 64.9   | 2.27  | 4.82  | <0,00001 |
| WAC-AS1   | 1317.0  | 58.2  | 2911.0  | 167.9 | 4189.8 | 252.1 | 3550.4 | 711.7  | 1.41  | 2.66  | <0,00001 |
| WBSCR27   | 196.1   | 3.8   | 130.1   | 9.1   | 53.0   | 1.3   | 91.5   | 41.6   | -1.04 | 0.49  | 0.00323  |
| WEE1      | 1321.8  | 34.1  | 405.5   | 14.2  | 212.3  | 4.7   | 308.9  | 103.7  | -2.03 | 0.24  | <0,00001 |
| WFDC1     | 1519.0  | 133.4 | 51.5    | 6.1   | 208.8  | 24.5  | 130.2  | 85.7   | -3.18 | 0.11  | <0,00001 |
| WFDC3     | 313.2   | 11.4  | 436.1   | 58.9  | 1815.8 | 39.6  | 1125.9 | 738.9  | 1.63  | 3.09  | 0.00078  |
| WNT5B     | 488.5   | 42.9  | 10800.0 | 859.5 | 3284.7 | 290.6 | 7042.3 | 4060.8 | 3.50  | 11.29 | <0,00001 |
| WSCD1     | 304.3   | 16.3  | 125.7   | 10.1  | 53.4   | 2.1   | 89.5   | 39.2   | -1.68 | 0.31  | <0,00001 |
| XIST      | 30.5    | 1.7   | 6598.5  | 975.2 | 33.0   | 1.0   | 3315.8 | 3567.0 | 2.15  | 4.44  | 0.00551  |
| ZBED2     | 36.9    | 2.6   | 180.6   | 40.1  | 64.8   | 4.7   | 122.7  | 67.3   | 1.60  | 3.03  | 0.00011  |
| ZBED3     | 6094.0  | 152.0 | 2258.5  | 164.7 | 2718.2 | 158.6 | 2488.3 | 287.7  | -1.29 | 0.41  | <0,00001 |
| ZCCHC18   | 300.2   | 15.2  | 131.0   | 2.3   | 137.1  | 19.8  | 134.0  | 13.5   | -1.16 | 0.45  | <0,00001 |
| ZCCHC24   | 260.3   | 18.6  | 608.4   | 40.9  | 1055.7 | 25.4  | 832.1  | 241.1  | 1.64  | 3.11  | <0,00001 |
| ZFP42     | 158.3   | 7.8   | 34.3    | 2.0   | 82.9   | 7.6   | 58.6   | 26.5   | -1.36 | 0.39  | 0.00005  |
| ZHX3      | 1836.7  | 85.9  | 5173.2  | 258.6 | 3464.5 | 146.2 | 4318.9 | 933.8  | 1.22  | 2.32  | <0,00001 |
| ZNF106    | 10031.4 | 838.0 | 4679.5  | 228.2 | 2719.4 | 61.1  | 3699.4 | 1059.1 | -1.40 | 0.38  | <0,00001 |
| ZNF165    | 1505.1  | 81.5  | 361.7   | 32.8  | 243.2  | 16.3  | 302.5  | 67.7   | -2.28 | 0.21  | <0,00001 |
| ZNF300P1  | 514.2   | 60.1  | 204.3   | 28.7  | 287.5  | 10.0  | 245.9  | 48.7   | -1.05 | 0.48  | <0,00001 |
| ZNF469    | 19618.6 | 611.6 | 1720.7  | 167.0 | 7212.7 | 570.2 | 4466.7 | 2961.3 | -1.90 | 0.27  | 0.00007  |
| ZNF503    | 1091.5  | 40.9  | 1872.8  | 254.9 | 6767.0 | 214.7 | 4319.9 | 2625.2 | 1.78  | 3.45  | 0.00006  |
| ZNF521    | 1066.7  | 92.9  | 116.6   | 7.3   | 512.0  | 56.0  | 314.3  | 214.5  | -1.56 | 0.34  | 0.00174  |
| ZPLD1     | 32.6    | 1.3   | 131.0   | 14.0  | 92.6   | 5.3   | 111.8  | 22.7   | 1.76  | 3.39  | <0,00001 |
