# Supplementary material
Source: publisher figshare collection journal article supplement (https://karger.figshare.com/articles/dataset/_/5514037)
Supplement: Supplementary file 3 [file 1]

# Supplemental Online Material 1: Table of primers for RT-PCR

“Regulation of angiogenic and inflammatory factors in CNV-derived RPE” Christoph Ehliken et al.

| gene symbol     | gene                                                     | forward primer        | reverse primer        |
|-----------------|----------------------------------------------------------|-----------------------|-----------------------|
| ACTB            | actin, beta                                              | gcactcttcagccttcctt   | gttggcgtagcaggtcttgc  |
| GAPDH           | glyceraldehyde-3-phosphate dehydrogenase                 | agggctgctttaactctggt  | gatgacaagctcccgttct   |
| COX7A1          | cytochrome c oxidase subunit VIIa polypeptide 1 (muscle) | ggcctggggctcctggaca   | gcggaggagctgaaggagcg  |
| RLBP1 (CRALBP)  | retinaldehyde binding protein 1                          | tcaagggctttaccatgcag  | ggctggtgatgaagtggat   |
| CTNNB1          | catenin beta 1                                           | acgtgcaatccctgaactga  | caaggtcccagcggtagaac  |
| IQCA1           | IQ motif containing with AAA domain 1                    | agagctcccggagggcgag   | caggatgcggcccatcaccc  |
| KRT18           | keratin 18, type I                                       | cgggagcacttgagaaga    | atggcaatctgggcttagg   |
| SERPINF1 (PEDF) | serpin peptidase inhibitor, clade F, member 1            | aggcggctcctactgtccc   | atcctcgttcactcaaagc   |
| RDH5            | retinol dehydrogenase 5 (11-cis/9-cis)                   | gcgggtgctgaatgtgaacac | ggaagaagccaggctccacga |
| RPE65           | retinal pigment epithelium-specific protein 65kDa        | gccctcctgcacaagttga   | cagtggccccattgacaga   |
| RGS5            | regulator of G-protein signaling 5                       | ggccctgcagtgccgtgatt  | gcgcacaaagcgaggcagag  |
| SLITRK6         | SLIT and NTRK like family member 6                       | tgaacacctctccagctgtgc | tggaaaggtcgtgatggtgca |
| VIM             | vimentin                                                 | tggatgttccaagcctgac   | tgcacctgtctccgtactc   |
| BEST1           | bestrophin 1                                             | ggctccacctcaacatcag   | tccaggcctgtgtcttcc    |
| VWF             | von Willebrand factor                                    | agtgtgccctgctggtatg   | ccctggacattcttcattgc  |
